# Supplementary material for: Rationally derived inhibitors of hepatitis C virus (HCV) p7 channel activity reveal prospect for bimodal antiviral therapy
Source: eLife journal article supplement (doi:10.7554/elife.52555), 2020-11-10
Supplement: fig1-data1 [file Exp 019.xlsx]

## Sheet: Experimental Procedure
	Exp #017 -
Aim(s)	Test Lead and key p7i for activity against gt3a p7 using S52-JFH1
	Compare to J4-JFH1
	Compare old/new aliquots of JK3-32
																		Drug plate 1; S52-JFH1
																		Inhibitor	Concentration (0.25 % DMSO)
																		RIM	100	56.5	31.9	18	10	5.75	3.25	1.84	µM	1/4 log10 (x1.77)
Day 1	Friday	Electroporate 10 µg RNA into cells (9.5 µl)															new	JK3/32	40000	4000	400	40	4	0.4	0.04	0	nM	1 log10 (x10)
	2015-05-08																new	JK3/32	40000	4000	400	40	4	0.4	0.04	0	nM	1 log10 (x10)
					RNA stock			TC			Resuspend in (ml media)			Cell density/ml		cells/well		JK3/34	40000	4000	400	40	4	0.4	0.04	0	nM	1 log10 (x10)
		#1	S52-JFH1	10.3 µl	aliquot - 08/01/15		10 µg	34.4	267V		16			250000		25000		JK3/34	40000	4000	400	40	4	0.4	0.04	0	nM	1 log10 (x10)
		#2	J4-JFH1	9.6 µl	aliquot - 22/01/15		10 µg	35.2	267V		16			250000		25000		JK3/42	40000	4000	400	40	4	0.4	0.04	0	nM	1 log10 (x10)
																		JK3/42	40000	4000	400	40	4	0.4	0.04	0	nM	1 log10 (x10)
																		1191-108	40000	4000	400	40	4	0.4	0.04	0	nM	1 log10 (x10)
																		1191-108	40000	4000	400	40	4	0.4	0.04	0	nM	1 log10 (x10)
																	old	JK3/32	40000	4000	400	40	4	0.4	0.04	0	nM	1 log10 (x10)
																	old	JK3/32	40000	4000	400	40	4	0.4	0.04	0	nM	1 log10 (x10)
Day 4	Monday	Seed cells for infection (Huh7)					Dilute to cells/ml			cells/well (100 µl seeded)								DCV	100	10	1	0.1	0.01	0.001	0.0001	0	nM	1 log10 (x10)
	2015-05-11	Incubate 6h					80000			8000
		Move supernatant (unclarified, 100ul) onto 2-fold dilution wells
		Perform 2-fold diluton series
																		12-point IC50 curves for each compound, 1/2 log10 dilutions (x3.16)
		Perform 1:4 dilutions (50 in 150)
		Incubate 48h																Drug plate 2; S52-JFH1
																		Inhibitor	Concentration (0.25 % DMSO)
		Remove remaining media -> waste, wash 1 x PBS and fix in PFA													S52-JFH1			JK3/32	40000	12600	4000	1260	400	126	40	12.7	4	1.27	0.4	0	µM	1/4 log10 (x1.77)
		Remove from CatIII, wash and store in 180ul PBS													S52-JFH1			JK3/32	40000	12600	4000	1260	400	126	40	12.7	4	1.27	0.4	0	nM	1/2 log10 (x3.16)
															S52-JFH1			JK3/32	40000	12600	4000	1260	400	126	40	12.7	4	1.27	0.4	0	nM	1/2 log10 (x3.16)
															S52-JFH1			JK3/32	40000	12600	4000	1260	400	126	40	12.7	4	1.27	0.4	0	nM	1/2 log10 (x3.16)
Day 6	Wednesday	Wash cells 2x (< 100 µl PBS)													J4-JFH1		old	JK3/32	40000	12600	4000	1260	400	126	40	12.7	4	1.27	0.4	0	nM	1/2 log10 (x3.16)
	2015-05-13	Fix in 100 µl 4% PFA													J4-JFH1		old	JK3/32	40000	12600	4000	1260	400	126	40	12.7	4	1.27	0.4	0	nM	1/2 log10 (x3.16)
		TAKE OUT OF CATIII													J4-JFH1		old	JK3/32	40000	12600	4000	1260	400	126	40	12.7	4	1.27	0.4	0	nM	1/2 log10 (x3.16)
		Wash 3-4x PBS													J4-JFH1		old	JK3/32	40000	12600	4000	1260	400	126	40	12.7	4	1.27	0.4	0	nM	1/2 log10 (x3.16)
		Primary Ab o/n
		Secondary Ab 4h
		Image and analysis
																		Drug plate 1; J4-JFH1
																		Inhibitor	Concentration (0.25 % DMSO)
																		RIM	100	56.5	31.9	18	10	5.75	3.25	1.84	µM	1/4 log10 (x1.77)
																	new	JK3/32	40000	4000	400	40	4	0.4	0.04	0	nM	1 log10 (x10)
																	new	JK3/32	40000	4000	400	40	4	0.4	0.04	0	nM	1 log10 (x10)
																		JK3/34	40000	4000	400	40	4	0.4	0.04	0	nM	1 log10 (x10)
																		JK3/34	40000	4000	400	40	4	0.4	0.04	0	nM	1 log10 (x10)
																		JK3/42	40000	4000	400	40	4	0.4	0.04	0	nM	1 log10 (x10)
																		JK3/42	40000	4000	400	40	4	0.4	0.04	0	nM	1 log10 (x10)
																		1191-108	40000	4000	400	40	4	0.4	0.04	0	nM	1 log10 (x10)
																		1191-108	40000	4000	400	40	4	0.4	0.04	0	nM	1 log10 (x10)
																	old	JK3/32	40000	4000	400	40	4	0.4	0.04	0	nM	1 log10 (x10)
																	old	JK3/32	40000	4000	400	40	4	0.4	0.04	0	nM	1 log10 (x10)
																		DCV	100	10	1	0.1	0.01	0.001	0.0001	0	nM	1 log10 (x10)

## Sheet: Experimetal observations
	Huh7
	35	33		69.5 x 10^4/mL
	41	30
	Resuspend in 1.3mL to 1 x 10^7/mL
	1191-108 - strongly coloured and very insoluble at higher concentrations.

## Sheet: S52 plate 1
	Barcode: 2015y5m18d10h32
	Time Stamp:	2015-05-18 10:50:00	Elapsed:	0	hours
	Red Object Count (1/Well)
		1	2	3	4	5	6	7	8	9	10	11	12
	A	3050.75	3924.75	3879.75	3037	3023.25	3484	5095	3747.25	3204.25	3136.25	3682.25	2914.5
	B	5552.75	1460.25	3327.25	3238.5	3388.75	2876.75	2996.25	3176.75	3569.25	2672	3269.25	2593.5
	C	1692.25	3078.25	3058	2549.25	2539	2678.75	3531.75	2282.75	2764	2938	2419.5	2054.25
	D	3358	3528.25	1552.25	3095.25	2310.25	2173.75	2897	1958.75	2016.75	2986	2542.25	590.25
	E	2620.75	1910.75	2511.75	2651.75	2965.5	2002.75	2279.75	2549.25	5088.5	1627.25	2313.5	27
	F	3422.75	1262.25	1969	2730	3109	1184	1747	3921	4020.25	1791.25	1296.25	37
	G	1538.75	903.75	1279.5	3170	3276	1306.5	1521.75	2477.25	3013.25	736.75	1381.75	57.5
	H	3.25	463.75	395.5	1361.25	1631	61	163.25	637.75	743.5	562.75	463.5	9.75
	Std Error
		1	2	3	4	5	6	7	8	9	10	11	12
	A	609.284	392.737	140.113	526.579	117.762	80.6825	115.673	346.262	286.663	294.286	500.171	504.146
	B	440.262	484.511	575.15	325.39	706.977	451.318	147.352	301.045	625.216	539.766	703.702	321.995
	C	208.647	638.645	387.989	552.001	144.161	481.346	607.719	673.692	501.137	355.901	648.623	226.547
	D	727.745	358.588	167.668	521.402	363.248	264.574	407.528	247.064	436.142	385.209	487.269	122.855
	E	832.966	379.763	194.939	373.802	245.744	453.026	461.13	278.147	283.053	195.962	434.196	19.0919
	F	589.552	234.422	271.369	255.865	408.69	334.28	306.764	218.715	898.579	81.5959	209.243	6.44205
	G	186.852	304.213	76.1583	293.267	458.013	175.091	159.805	345.132	492.029	172.555	143.838	11.565
	H	3.25	31.1993	106.744	298.934	404.156	18.1429	31.0896	79.3456	115.442	100.57	63.4777	3.25
	% Error
		0.199716	0.100067	0.036114	0.173388	0.0389521	0.023158	0.0227032	0.0924044	0.0894634	0.0938339	0.135833	0.172979
		0.0792872	0.3318	0.17286	0.100476	0.208625	0.156885	0.0491787	0.0947652	0.175167	0.202008	0.215249	0.124155
		0.123296	0.20747	0.126877	0.216535	0.0567788	0.17969	0.172073	0.295123	0.181309	0.121137	0.268081	0.110282
		0.21672	0.101633	0.108016	0.168452	0.157233	0.121713	0.140672	0.126134	0.21626	0.129005	0.191668	0.20814
		0.317835	0.198751	0.0776107	0.140964	0.0828676	0.226202	0.202272	0.109109	0.0556259	0.120425	0.187679	0.707107
		0.172245	0.185718	0.137821	0.0937236	0.131454	0.282331	0.175595	0.0557804	0.223513	0.0455525	0.161422	0.174109
		0.121431	0.336612	0.0595219	0.0925133	0.139809	0.134015	0.105014	0.13932	0.163289	0.234211	0.104098	0.201131
		1	0.0672761	0.269896	0.219602	0.247796	0.297425	0.190442	0.124415	0.155269	0.178712	0.136953	0.333333
		3.25	463.75	395.5	1361.25	1631	61	163.25	637.75	743.5	562.75	463.5	9.75
		1538.75	903.75	1279.5	3170	3276	1306.5	1521.75	2477.25	3013.25	736.75	1381.75	57.5
		3422.75	1262.25	1969	2730	3109	1184	1747	3921	4020.25	1791.25	1296.25	37
		2620.75	1910.75	2511.75	2651.75	2965.5	2002.75	2279.75	2549.25	5088.5	1627.25	2313.5	27
		3358	3528.25	1552.25	3095.25	2310.25	2173.75	2897	1958.75	2016.75	2986	2542.25	590.25
		1692.25	3078.25	3058	2549.25	2539	2678.75	3531.75	2282.75	2764	2938	2419.5	2054.25
		5552.75	1460.25	3327.25	3238.5	3388.75	2876.75	2996.25	3176.75	3569.25	2672	3269.25	2593.5
		3050.75	3924.75	3879.75	3037	3023.25	3484	5095	3747.25	3204.25	3136.25	3682.25	2914.5
		3050.75	3902.25	3902.25	3030.12	3030.12	3484	3484	3475.75	3475.75	3409.25	3409.25	2914.5
		3050.75	3902.25	3902.25	3030.12	3030.12	3484	3484	3475.75	3475.75	3409.25	3409.25	2914.5
		3050.75	3902.25	3902.25	3030.12	3030.12	3484	3484	3475.75	3475.75	3409.25	3409.25	2914.5
		3050.75	3902.25	3902.25	3030.12	3030.12	3484	3484	3475.75	3475.75	3409.25	3409.25	2914.5
		3050.75	3902.25	3902.25	3030.12	3030.12	3484	3484	3475.75	3475.75	3409.25	3409.25	2914.5
		3050.75	3902.25	3902.25	3030.12	3030.12	3484	3484	3475.75	3475.75	3409.25	3409.25	2914.5
		3050.75	3902.25	3902.25	3030.12	3030.12	3484	3484	3475.75	3475.75	3409.25	3409.25	2914.5
		3050.75	3902.25	3902.25	3030.12	3030.12	3484	3484	3475.75	3475.75	3409.25	3409.25	2914.5
			JK3-32 (new)		JK3-34		JK3-42		1191-108		JK3-32 (old)		DCV
		0.106531	11.8842	10.1352	44.9239	53.8262	1.75086	4.68571	18.3486	21.3911	16.5066	13.5954	0.334534
		50.4384	23.1597	32.7888	104.616	108.114	37.5	43.6782	71.2724	86.6935	21.6103	40.5294	1.97289
		112.194	32.3467	50.4581	90.0953	102.603	33.9839	50.1435	112.81	115.666	52.5409	38.0216	1.26951
		85.9051	48.9653	64.3667	87.5129	97.8672	57.4842	65.4348	73.3439	146.4	47.7304	67.8595	0.926402
		110.071	90.4158	39.7783	102.149	76.2427	62.3924	83.1515	56.3547	58.0234	87.5852	74.5692	20.2522
		55.47	78.884	78.365	84.1302	83.7919	76.8872	101.371	65.6765	79.5224	86.1773	70.9687	70.4838
		182.013	37.4207	85.2649	106.877	111.835	82.5703	86.0003	91.3975	102.69	78.375	95.8935	88.9861
		100	100.577	99.4234	100.227	99.7731	100	146.24	107.811	92.1887	91.9924	108.008	100
			IC50 1075 nM		IC50 >4 uM		IC50 >400 nM		IC50 >4uM		IC50 22.5 uM
																	100	56.5	31.9	18	10	5.75	3.25	1.84

## Sheet: S52-J4 plate 2
	Barcode: 2015y5m18d11h9
	Time Stamp:	2015-05-18 11:14:00	Elapsed:	0	hours
	Red Object Count (1/Well)
		1	2	3	4	5	6	7	8	9	10	11	12
	A	211.25	310	416	491.25	958.5	1221.5	1494.5	2054.25	1040.5	1859.5	1037	2887
	B	149.75	286.25	723	712.75	1194.25	1334	1296.75	2484.25	1221.25	1276	1801.75	2238.5
	C	173.5	402	576.25	760.75	1515	1689	1538.75	3081.75	1255.5	2160	1337.25	3166.5
	D	313.5	491	661.5	1286.25	1808.25	2207.5	2456.75	3248.75	2064.5	3071.25	2191	2057.5
	E	71	54	40.5	98.25	163.5	225	177.25	207.75	228	214.5	245.5	392.25
	F	40.25	57.5	112.25	91.5	197.5	153	136	184	143	245.5	208	480.5
	G	43.75	95	122.25	129	248.5	211.25	269.25	214.5	262.5	272.5	252.25	378.25
	H	16.5	37	40.25	108.5	135.75	173.5	238.5	149.75	320.5	269.25	183.75	320.5
	Std Error
		1	2	3	4	5	6	7	8	9	10	11	12
	A	49.2144	52.7273	51.6865	95.1415	205.764	253.794	209.478	215.521	89.9532	94.4091	93.9734	351.95
	B	22.25	83.218	196.347	163.205	261.704	231.347	146.515	531.461	317.349	135.078	272.663	371.367
	C	69.0525	153.723	126.503	138.405	225.572	164.039	580.376	271.358	153.996	206.38	179.626	469.113
	D	139.98	84.3327	98.3145	183.256	343.46	255.857	445.095	412.363	257.024	587.962	222.096	177.171
	E	15.2589	14.7366	12.5067	39.5377	12.5067	49.3491	28.9522	34.0988	68.4312	37.8429	41.0558	73.2011
	F	14.6593	26.3455	29.173	24.4626	42.6741	39.2173	38.1117	54.091	14.1716	31.4656	45.5247	58.964
	G	15.052	28.3431	58.1268	32.876	63.58	8.84473	56.2307	38.023	48.6647	37.3062	28.5697	79.2952
	H	3.5	11.7118	5.51324	32.1934	29.07	38.8426	51.2291	42.4291	63.7371	45.6643	53.6647	106.521
	% Error
		0.232968	0.170088	0.124247	0.193672	0.214673	0.207773	0.140166	0.104915	0.0864519	0.0507712	0.0906204	0.121909
		0.148581	0.290718	0.271573	0.228979	0.219137	0.173424	0.112986	0.213932	0.259856	0.105861	0.151332	0.1659
		0.397997	0.382396	0.219527	0.181933	0.148892	0.0971217	0.377173	0.0880532	0.122657	0.0955462	0.134325	0.148149
		0.446506	0.171757	0.148624	0.142473	0.18994	0.115903	0.181172	0.12693	0.124497	0.191441	0.101367	0.0861096
		0.214914	0.2729	0.308807	0.402419	0.0764934	0.219329	0.163341	0.164134	0.300137	0.176424	0.167234	0.186618
		0.364207	0.458182	0.259893	0.26735	0.216072	0.256322	0.280233	0.293973	0.0991019	0.128169	0.218869	0.122714
		0.344045	0.298349	0.475475	0.254853	0.255855	0.0418685	0.208842	0.177263	0.185389	0.136903	0.11326	0.209637
		0.212121	0.316536	0.136975	0.296714	0.214143	0.223877	0.214797	0.283333	0.198868	0.169598	0.292053	0.332359
			211.25	149.75		173.5	313.5		71	40.25		43.75	16.5
			310	286.25		402	491		54	57.5		95	37
			416	723		576.25	661.5		40.5	112.25		122.25	40.25
			491.25	712.75		760.75	1286.25		98.25	91.5		129	108.5
			958.5	1194.25		1515	1808.25		163.5	197.5		248.5	135.75
			1221.5	1334		1689	2207.5		225	153		211.25	173.5
			1494.5	1296.75		1538.75	2456.75		177.25	136		269.25	238.5
			2054.25	2484.25		3081.75	3248.75		207.75	184		214.5	149.75
			1040.5	1221.25		1255.5	2064.5		228	143		262.5	320.5
			1859.5	1276		2160	3071.25		214.5	245.5		272.5	269.25
			1037	1801.75		1337.25	2191		245.5	208		252.25	183.75
			2887	2238.5		3166.5	2057.5		392.25	480.5		378.25	320.5
			IC50 641.9 nM			IC50 834.4 nM			IC50 828.4 nM			IC50 1126 nM
			1419.38	1419.38		1764.12	1764.12		226.75	226.75		218	218
			1419.38	1419.38		1764.12	1764.12		226.75	226.75		218	218
			1419.38	1419.38		1764.12	1764.12		226.75	226.75		218	218
			1419.38	1419.38		1764.12	1764.12		226.75	226.75		218	218
			1419.38	1419.38		1764.12	1764.12		226.75	226.75		218	218
			1419.38	1419.38		1764.12	1764.12		226.75	226.75		218	218
			1419.38	1419.38		1764.12	1764.12		226.75	226.75		218	218
			1419.38	1419.38		1764.12	1764.12		226.75	226.75		218	218
			1419.38	1419.38		1764.12	1764.12		226.75	226.75		218	218
			1419.38	1419.38		1764.12	1764.12		226.75	226.75		218	218
			1419.38	1419.38		1764.12	1764.12		226.75	226.75		218	218
			14.8833	10.5504		9.8349	17.7708		31.312	17.7508		20.0688	7.56881
			21.8406	20.1673		22.7875	27.8325		23.8148	25.3583		43.578	16.9725
			29.3087	50.9379		32.6649	37.4973		17.8611	49.5039		56.078	18.4633
			34.6103	50.2158		43.1234	72.9115		43.3297	40.3528		59.1743	49.7706
			67.5297	84.1391		85.8783	102.501		72.1058	87.1003		113.991	62.2706
			86.059	93.985		95.7415	125.133		99.2282	67.4752		96.9037	79.5872
			105.293	91.3606		87.2245	139.262		78.1698	59.9779		123.509	109.404
			144.729	175.024		174.69	184.156		91.6207	81.1466		98.3945	68.6927
			73.3069	86.0414		71.1684	117.027		100.551	63.065		120.413	147.018
			131.008	89.8987		122.44	174.095		94.5976	108.269		125	123.509
			73.0603	126.94		75.8025	124.198		108.269	91.731		115.711	84.289
			gt3a			gt3a			gt1b - old			gt1b - old

## Sheet: J4 plate 3
	Barcode: 2015y5m18d11h33
	Time Stamp:	2015-05-18 11:54:00	Elapsed:	0	hours
	Red Object Count (1/Well)
		1	2	3	4	5	6	7	8	9	10	11	12
	A	265.5	330.75	555.75	252	419.25	392.25	173.75	480.75	289.5	378.5	300	382
	B	139.5	293	245.25	218	327.5	327.25	153.25	248.75	211.25	207.75	252	351
	C	221.5	214.75	351	276.25	258.75	129.25	194	190.75	77.75	149.75	201	184
	D	136	303.5	382	207.5	153	119	122.25	115.5	153.25	163.5	156.75	61
	E	125.75	201	337.5	204	115.25	115.5	207.5	136	176.75	177	177	33.75
	F	142.75	146	173.5	153.25	101.75	146.25	132.5	320.25	218	132.5	146	20
	G	190.75	64.25	57.5	180.5	279.5	190.75	101.75	446.5	549	67.75	64.5	26.75
	H	3.25	37.25	47	160	132.25	20	33.5	187.25	163.25	26.75	26.75	6.75
	Std Error
		1	2	3	4	5	6	7	8	9	10	11	12
	A	48.7998	43.5973	126.229	39.5538	150.375	83.8604	13.9665	100.725	41.3793	96.7406	61.4044	95.3529
	B	17.8396	78.2017	32.5919	36.6697	34.3717	42.6524	36.367	53.7454	66.1027	67.2661	48.1266	39.7848
	C	34.2406	82.4797	53.7401	31.6685	38.9002	32.8237	45.5247	67.6971	18.8077	36.7319	46.4166	18.1429
	D	28.9914	78.6644	83.3137	57.7675	48.7699	24.5323	24.4451	38.7782	23.1998	37.3062	6.75	25.7973
	E	20.2747	61.9314	94.7782	50.2145	6.75	38.7782	47.3999	47.543	32.0868	34.0612	17.6871	14.1326
	F	28.6891	43.3724	71.9496	33.6337	23.3001	28.7471	32.3123	116.869	34.0612	14.0268	23.8572	4.04145
	G	41.369	11.7358	31.3223	70.1979	65.6157	64.8092	30.3105	93.565	130.464	11.2278	14.0268	9.42846
	H	3.25	24.5437	11.7402	77.3822	51.25	11.7402	16.1735	49.6779	29.6265	5.51324	18.3411	6.75
	% Error
		0.183803	0.131814	0.227133	0.156959	0.358675	0.213793	0.0803826	0.209517	0.142934	0.25559	0.204681	0.249615
		0.127882	0.2669	0.132892	0.16821	0.104952	0.130336	0.237305	0.216062	0.312912	0.323784	0.190978	0.113347
		0.154585	0.384073	0.153106	0.114637	0.150339	0.253955	0.234664	0.3549	0.2419	0.245288	0.230928	0.098603
		0.213172	0.259191	0.218099	0.278398	0.318757	0.206154	0.19996	0.335742	0.151385	0.228172	0.0430622	0.422906
		0.16123	0.308117	0.280824	0.24615	0.0585683	0.335742	0.228433	0.349581	0.181538	0.192436	0.0999271	0.418743
		0.200974	0.297071	0.414695	0.21947	0.228994	0.196561	0.243866	0.364931	0.156244	0.105862	0.163406	0.202073
		0.216876	0.182659	0.544735	0.388908	0.234761	0.33976	0.297892	0.209552	0.237639	0.165723	0.217469	0.352466
		1	0.658893	0.249792	0.483639	0.387524	0.587012	0.482792	0.265303	0.181479	0.206103	0.685649	1
		3.25	37.25	47	160	132.25	20	33.5	187.25	163.25	26.75	26.75	6.75
		190.75	64.25	57.5	180.5	279.5	190.75	101.75	446.5	549	67.75	64.5	26.75
		142.75	146	173.5	153.25	101.75	146.25	132.5	320.25	218	132.5	146	20
		125.75	201	337.5	204	115.25	115.5	207.5	136	176.75	177	177	33.75
		136	303.5	382	207.5	153	119	122.25	115.5	153.25	163.5	156.75	61
		221.5	214.75	351	276.25	258.75	129.25	194	190.75	77.75	149.75	201	184
		139.5	293	245.25	218	327.5	327.25	153.25	248.75	211.25	207.75	252	351
		265.5	330.75	555.75	252	419.25	392.25	173.75	480.75	289.5	378.5	300	382
		265.5	443.25	443.25	335.625	335.625	283	283	385.125	385.125	339.25	339.25	382
		265.5	443.25	443.25	335.625	335.625	283	283	385.125	385.125	339.25	339.25	382
		265.5	443.25	443.25	335.625	335.625	283	283	385.125	385.125	339.25	339.25	382
		265.5	443.25	443.25	335.625	335.625	283	283	385.125	385.125	339.25	339.25	382
		265.5	443.25	443.25	335.625	335.625	283	283	385.125	385.125	339.25	339.25	382
		265.5	443.25	443.25	335.625	335.625	283	283	385.125	385.125	339.25	339.25	382
		265.5	443.25	443.25	335.625	335.625	283	283	385.125	385.125	339.25	339.25	382
		265.5	443.25	443.25	335.625	335.625	283	283	385.125	385.125	339.25	339.25	382
			JK3-32 (new)		JK3-34		JK3-42		1191-108		JK3-32 (old)		DCV
		1.22411	8.40384	10.6035	47.6723	39.4041	7.06714	11.8375	48.6206	42.3888	7.88504	7.88504	1.76702
		71.8456	14.4952	12.9724	53.7803	83.2775	67.4028	35.9541	115.936	142.551	19.9705	19.0125	7.00262
		53.7665	32.9385	39.1427	45.6611	30.3166	51.6784	46.8198	83.1548	56.605	39.0567	43.0361	5.2356
		47.3635	45.3469	76.1421	60.7821	34.3389	40.8127	73.3216	35.3132	45.8942	52.1739	52.1739	8.83508
		51.2241	68.4715	86.1816	61.825	45.5866	42.0495	43.1979	29.9903	39.7923	48.1945	46.2049	15.9686
		83.4275	48.449	79.1878	82.3091	77.095	45.6714	68.5512	49.5294	20.1883	44.1415	59.2483	48.1675
		52.5424	66.1027	55.3299	64.9534	97.5791	115.636	54.1519	64.5894	54.8523	61.238	74.2815	91.8848
		100	74.6193	125.381	75.0838	124.916	138.604	61.3958	124.83	75.1704	111.57	88.4304	100
			IC50 242 nM		IC50 >40 uM		IC50 >4 uM		? Weird curve again!		IC50 >400 nM
																		100	56.5	31.9	18	10	5.75	3.25	1.84
