# Supplementary material for: Rationally derived inhibitors of hepatitis C virus (HCV) p7 channel activity reveal prospect for bimodal antiviral therapy
Source: eLife journal article supplement (doi:10.7554/elife.52555), 2020-11-10
Supplement: fig1-data1 [file SAR-table-data.xlsx]

## Sheet: IC50 curves
Compound	Structure	vs J4-JFH1	vs J4-JFH1	vs J4-JFH1	vs J4-JFH1			vs S52-JFH1			vs JFH1
R21
R21.8
R21.9
RS5
RS6
RS7
RS8
RS9
RS10
RS11 (R21)
RS13
RS14
RS16
RS17
RS18
RS21
RS22
JK3/32
JK3/34
JK3/38
JK3/40
JK3/42
JK3/43
JK3/46
BIT225
resynthesised R21
1191-79
1191-90
1191-104
1191-106
1191-108

## Sheet: IC50 values
Compound	Structure	vs J4-JFH1	vs J4-JFH1	vs J4-JFH1					vs S52-JFH1				vs JFH1
R21		IC50 = ? CC50 = > 4 µM	IC50 = > 4 µM CC50 = > 4 µM
R21.8		IC50 = > 40 µM CC50 = > 40 µM	IC50 = > 40 µM CC50 = > 40 µM
R21.9		IC50 = > 40 µM CC50 = > 40 µM	IC50 = > 40 µM CC50 = > 40 µM
RS5		IC50 = > 4 µM CC50 = > 4 µM
RS6		IC50 = > 40 µM CC50 = > 40 µM	IC50 = > 40 µM CC50 = > 40 µM
RS7		IC50 = 1.14 µM CC50 = > 4 µM	IC50 = > 400 nM CC50 = > 40 µM						IC50 = 1.36 µM CC50 = > 40 µM
RS8		IC50 = 279 nM CC50 = > 4 µM	IC50 = ? CC50 = > 40 µM	IC50 = 1.27 µM CC50 = > 40 µM					IC50 = > 400 nM CC50 = > 40 µM
RS9		IC50 = ? CC50 = > 4 µM	IC50 = > 40 µM CC50 = > 40 µM
RS10		IC50 = > 40 µM CC50 = > 40 µM	IC50 = > 40 µM CC50 = > 40 µM
RS11 (R21)		IC50 = > 4 µM CC50 = > 4 µM	IC50 = > 4 µM CC50 = > 4 µM						IC50 = > 400 nM CC50 = > 4 µM
RS13		IC50 = > 4 µM CC50 = > 4 µM
RS14		IC50 = > 4 µM CC50 = > 4 µM
RS16		IC50 = ? CC50 = > 4 µM	IC50 = > 40 µM CC50 = > 40 µM
RS17		IC50 = 539.1 nM CC50 = > 4 µM	IC50 = > 400 nM CC50 = > 4 µM
RS18		IC50 = ? CC50 = > 4 µM	IC50 = > 40 µM CC50 = > 40 µM
RS21		IC50 = ? CC50 = > 4 µM	IC50 = > 40 µM CC50 = > 40 µM
RS22		IC50 = > 4 µM CC50 = > 4 µM	IC50 = > 4 µM CC50 = > 4 µM
JK3/32		IC50 = 175.5 nM CC50 = > 4 µM	IC50 = 60.8 nM CC50 = > 4 µM	IC50 = 447 nM CC50 = > 40 µM	IC50 = 610 nM CC50 = > 12.6 µM								IC50 = 2.8 µM CC50 = > 12.6 µM
JK3/34		IC50 = 6.1 µM CC50 = > 40 µM	IC50 = 1 µM CC50 = > 40 µM	IC50 = ? CC50 = > 40 µM
JK3/38		IC50 = > 4 µM CC50 = > 40 µM	IC50 = > 4 µM CC50 = > 4 µM
JK3/40		IC50 = > 4 µM CC50 = > 40 µM
JK3/42		IC50 = 358 nM CC50 = > 4 µM	IC50 = > 400 nM CC50 = > 4 µM						IC50 = > 400 nM CC50 = > 4 µM
JK3/43		IC50 = > 4 µM CC50 = > 40 µM	IC50 = ? CC50 = > 40 µM
JK3/46		IC50 = 2.13 µM CC50 = > 4 µM	IC50 = > 4 µM CC50 = > 4 µM
BIT225		IC50 = > 4 µM CC50 = > 4 µM	IC50 = > 4 µM CC50 = > 4 µM	IC50 = 17.7 µM CC50 = 18.6 µM					IC50 = > 4 µM CC50 = > 4 µM
resynthesised R21		IC50 = > 4 µM CC50 = > 4 µM
1191-79		IC50 = 13.3 µM CC50 = 12.6 µM
1191-90		IC50 = > 40 µM CC50 = > 40 µM
1191-104		IC50 = 11.3 µM CC50 = > 40 µM
1191-106		IC50 = 11.6 µM CC50 = > 40 µM
1191-108
