# Supplementary material for: Rationally derived inhibitors of hepatitis C virus (HCV) p7 channel activity reveal prospect for bimodal antiviral therapy
Source: eLife journal article supplement (doi:10.7554/elife.52555), 2020-11-10
Supplement: fig1-figsupp1-data1 [file data analysis.xlsx]

## Sheet: HS-PD
	Label: JS-48h_titration_061114
	Time Stamp:	2014-11-06 17:00:00	Elapsed:	0	hours
	HS 15.10.14 JS Images Plate 1 Red Count (1/Well)
		1	2	3	4	5	6	7	8	9	10	11	12			2	4	8	16	32	64	128	256	512	1024	2048	4096
	A															1802	474	310.25	142.75	37.25	16.75	0	10	3.25	0	13.25	0
	B	1802	474	310.25	142.75	37.25	16.75	0	10	3.25	0	13.25	0			3474.25	0	0	0	0	6.75	0	0	0	0	3.25	6.75
	C	3474.25	0	0	0	0	6.75	0	0	0	0	3.25	6.75			3658.25	1013.25	474	156.25	160	81.5	23.5	16.75	0	0	3.25	13.25
	D	3658.25	1013.25	474	156.25	160	81.5	23.5	16.75	0	0	3.25	13.25			4381.75	1535.25	729.75	344	194.25	122.25	33.75	44	10	0	3.25	0
	E	4381.75	1535.25	729.75	344	194.25	122.25	33.75	44	10	0	3.25	0
	F	3.25	0	13.5	6.75	0	0	0	13.25	0	0	3.25	0
	Std Error
		1	2	3	4	5	6	7	8	9	10	11	12
	A
	B	228.657	69.264	62.8548	32.7195	21.6694	10.0281	0	6.44205	3.25	0	5.51324	0
	C	1331.68	0	0	0	0	6.75	0	0	0	0	3.25	6.75
	D	1304.83	56.1803	63.0674	26.487	36.6037	28.8343	19.41	12.7892	0	0	3.25	9.42846
	E	732.325	457.647	86.651	50.5585	41.2944	43.5419	11.884	20.2608	10	0	3.25	0
	F	3.25	0	13.5	6.75	0	0	0	5.51324	0	0	3.25	0
		Fold dilution
		2	4	8	16	32	64	128	256	512	1024	2048	4096
JFH1		1802	474	310.25	142.75	37.25	16.75	0	10	3.25	0	13.25	0
JFH1 error		228.657	69.264	62.8548	32.7195	21.6694	10.0281	0	6.44205	3.25	0	5.51324	0
		0.126891	0.146127	0.202594	0.229208	0.581729	0.598692	#DIV/0!	0.644205	1	#DIV/0!	0.416094	#DIV/0!
JFH1 GND		3474.25	0	0	0	0	6.75	0	0	0	0	3.25	6.75
JFH1 GND error		1331.68	0	0	0	0	6.75	0	0	0	0	3.25	6.75
		0.3833	#DIV/0!	#DIV/0!	#DIV/0!	#DIV/0!	1	#DIV/0!	#DIV/0!	#DIV/0!	#DIV/0!	1	1
																Use 4-16 fold dilutions to calculate titre
J4-JFH1 5ug		3658.25	1013.25	474	156.25	160	81.5	23.5	16.75	0	0	3.25	13.25
J4-JFH1 5ug error		1304.83	56.1803	63.0674	26.487	36.6037	28.8343	19.41	12.7892	0	0	3.25	9.42846
		0.356681	0.0554457	0.133054	0.169517	0.228773	0.353795	0.82596	0.763532	#DIV/0!	#DIV/0!	1	0.711582
J4-JFH1 10ug		4381.75	1535.25	729.75	344	194.25	122.25	33.75	44	10	0	3.25	0
J4-JFH1 10ug error		732.325	457.647	86.651	50.5585	41.2944	43.5419	11.884	20.2608	10	0	3.25	0
		0.167131	0.298093	0.118741	0.146973	0.212584	0.356171	0.352118	0.460473	1	#DIV/0!	1	#DIV/0!
			JFH1				J4 JFH1 (5ug)				J4 JFH1 (10ug)
	Dilution factor		4	8	16		4	8	16		4	8	16
	NS5A cells/well		474	310.25	142.75		1013.25	474	156.25		1535.25	729.75	344
	* dilution factor		1896	2482	2284		4053	3792	2500		6141	5838	5504
	* 10 for per ml		18960	24820	22840		40530	37920	25000		61410	58380	55040
	AVG		22206.7				34483.3				58276.7
	Titre		22206.7				34483.3				58276.7

## Sheet: JS J4-JFHvirus PD
	Tweaked PD for J4-JFH - JS J4-JFHvirus PD (061114)
	Decreased min size filter to 150um
	Label: JS-48h_titration_061114
	Time Stamp:	2014-11-06 17:00:00	Elapsed:	0	hours
	JS J4-JFHvirus Red PD 061114 Count (1/Well)
		1	2	3	4	5	6	7	8	9	10	11	12
	A
	B	2730	624.25	409	207.75	47.5	16.75	10	20	23.5	20	47	43.75
	C	7231.75	16.75	0	3.25	0	17	6.5	6.75	0	10	27	23.25
	D	5969	1661.75	835.75	279.25	231.75	115.5	78	16.75	3.25	0	30.5	36.75
	E	8187.25	2508.25	1272.5	630.75	289.5	190.75	78	71.25	16.75	10	16.75	26.75
	Std Error
		1	2	3	4	5	6	7	8	9	10	11	12
	A
	B	328.618	73.8053	100.081	50.9532	29.5564	10.0281	6.44205	11.547	11.565	4.04145	14.1716	8.6446
	C	1624.78	6.48556	0	3.25	0	17	3.75278	6.75	0	6.44205	14.7366	6.48556
	D	2095.05	76.1822	86.1117	53.601	46.575	37.1786	43.8862	12.7892	3.25	0	26.3455	3.25
	E	1251.66	542.052	164.631	63.9627	75.6533	31.0896	39.3044	26.8836	10.0281	6.44205	6.48556	9.42846
		Didn't make much difference to dilutions lower than 1:2?

## Sheet: 48h drug plate J4-JFH PD
	Label: JS_48hinfection_Drugplate_061114
	Time Stamp:	2014-11-06 18:04:00	Elapsed:	0	hours
	JS J4-JFHvirus Red PD 061114 Count (1/Well)
		1	2	3	4	5	6	7	8	9	10	11	12
	A	30	81.5	71.25	115.5	132.5	94.75	125.5	187.25	228.25	139.5	163	173.75
	B	78	88.25	68	88.25	132.75	95	50.5	126	102	266	88	122.25
	C	57.5	47.25	108.75	81.25	245	115.75	156.5	91.5	190.5	173.75	112	102
	D	30	64.25	74.5	112.25	122.25	129.25	91.5	146.25	108.5	115.5	88.25	84.75
	E	61	71	64.25	115.5	98.25	262.25	129	177	136	88	67.75	47
	F	105.25	53.75	101.75	95	81.25	306.5	177	210.75	54	37	163.25	381.75
	G	665	47.25	54.25	125.5	54.25	187.25	170.25	579.5	60.75	95.25	501.5	508
	H	40.25	64.5	30.25	67.75	538.75	187	85	228.25	159.75	136	241.75	60.75
	Std Error
		1	2	3	4	5	6	7	8	9	10	11	12
	A	10.2225	30.9798	17.0508	59.6133	36.7435	43.1651	39.9698	29.5927	65.4935	29.7559	37.4277	13.0088
	B	6.44205	12.9253	24.2109	44.7965	55.8411	26.1119	3.5	38.7986	14.1716	53.9151	22.8145	31.9801
	C	11.565	6.75	33.9273	24.3049	100.429	47.8929	23.2755	17.1002	61.5772	49.9256	6.44205	17.2192
	D	6.44205	24.5437	27.6722	23.1998	24.3049	70.7088	18.0301	56.9684	7.79423	41.0051	30.3105	17.9507
	E	14.1716	33.9902	12.7892	23.2755	41.0455	86.8863	27.5892	47.7581	23.6714	43.3013	28.303	17.2192
	F	39.1373	9.66415	30.1976	17.6871	11.2278	216.839	43.568	55.862	24.2109	11.7118	48.319	323.288
	G	352.622	19.6018	22.9724	14.0268	19.3278	61.5797	35.98	372.237	35.3633	39.7877	298.125	251.839
	H	11.2278	21.8384	8.57686	9.66415	387.108	60.4235	25.7844	53.7454	66.8785	85.7215	160.135	16.4184

## Sheet: 72hpe tox
	Phase cell number
	Label: JS_72hpe_Drugplate_061114
	Time Stamp:	2014-11-06 18:04:00	Elapsed:	0	hours
																			RIM
	JS_J4-JFHvirus PD 061114 Count (1/Well)																					ST ERROR			% ERROR				AVG DMSO CONTROL
		1	2	3	4	5	6	7	8	9	10	11	12						3364.75	4105.5		508.022	398.425		0.150984	0.0970466
	A	419.25	88	177	122.5	245.25	204.25	289.5	235	180.5	347.75	494.25	1388.75						487.5	299.75		75.4823	118.479		0.154836	0.395259
	B	136	33.75	30.25	74.5	54	61	43.75	33.5	98.5	50.5	238.5	1214.5						286.25	115.5		25.3455	42.0109		0.0885433	0.363731
	C	78	47.25	81.5	47.25	26.75	40	81.25	88.25	95	132.5	170.25	569.5						378.5	54		139.188	24.2109		0.367737	0.44835
	D	160	43.75	19.75	43.75	30	30.25	81.25	71	30	81.5	556	2750.5						160	43.75		15.2589	17.9507		0.095368	0.410303
	E	378.5	54	50.5	81.5	60.75	67.75	47.25	74.5	44	13	2617.25	7924.75						78	47.25		26.4102	22.739		0.338593	0.481249
	F	286.25	115.5	98.25	98.5	74.5	279.25	37	91.75	30.25	108.75	7023.75	8259.25						136	33.75		41	11.884		0.301471	0.352118
	G	487.5	299.75	207.75	173.5	142.75	112	88	525	71.25	98.5	8778	6242						419.25	88		131.197	4.04145		0.312933	0.0459256
	H	3364.75	4105.5	2006.25	4139.5	842.5	586.75	811.75	982.75	750.5	910.75	3706	88.25
	Std Error																		LDS21
		1	2	3	4	5	6	7	8	9	10	11	12
	A	131.197	4.04145	59.8832	26.7722	43.113	67.0775	52.2023	39.2173	22.7248	107.922	94.4964	304.579						2006.25	4139.5		512.267	581.451		0.255335	0.140464
	B	41	11.884	3.25	30.7151	22.8728	17.2192	17.9507	8.77971	31.213	15.1465	62.5893	280.839						207.75	173.5		53.9141	53.4174		0.259514	0.307881
	C	26.4102	22.739	37.0506	16.2089	5.51324	0	32.0868	36.0749	31.1261	22.7248	25.1342	137.788						98.25	98.5		41.969	58.964		0.427165	0.598619
	D	15.2589	17.9507	6.75	12.7892	10.2225	13.0088	32.5919	26.5393	10.2225	33.3404	51.0669	468.863						50.5	81.5		17.1002	40.6561		0.338618	0.498848
	E	139.188	24.2109	17.1002	40.6561	21.3087	9.66415	29.7668	26.0176	17	0	343.984	560.946						19.75	43.75		6.75	12.7892		0.341772	0.292324
	F	25.3455	42.0109	41.969	58.964	35.507	137.636	24	23.1998	8.57686	36.7319	441.229	341.436						81.5	47.25		37.0506	16.2089		0.454609	0.343046
	G	75.4823	118.479	53.9141	53.4174	58.6535	48.6998	19.6299	308.366	13.0088	38.8426	372.983	402.668						30.25	74.5		3.25	30.7151		0.107438	0.412283
	H	508.022	398.425	512.267	581.451	159.23	186.751	224.583	435.019	192.058	156.065	367.693	18.048						177	122.5		59.8832	26.7722		0.338323	0.218548
																			LDS21.8
																			842.5	586.75		159.23	186.751		0.188997	0.31828
																			142.75	112		58.6535	48.6998		0.410882	0.434819
																			74.5	279.25		35.507	137.636		0.476605	0.492876
																			60.75	67.75		21.3087	9.66415		0.350761	0.142644
																			30	30.25		10.2225	13.0088		0.340751	0.430043
																			26.75	40		5.51324	0		0.206103	0
																			54	61		22.8728	17.2192		0.423571	0.282282
																			245.25	204.25		43.113	67.0775		0.175792	0.328409
																			LDS21.9
																			811.75	982.75		224.583	435.019		0.276666	0.442655
																			88	525		19.6299	308.366		0.223067	0.587363
																			37	91.75		24	23.1998		0.648649	0.252859
																			47.25	74.5		29.7668	26.0176		0.629985	0.34923
																			81.25	71		32.5919	26.5393		0.401131	0.373793
																			81.25	88.25		32.0868	36.0749		0.394914	0.40878
																			43.75	33.5		17.9507	8.77971		0.410303	0.262081
																			289.5	235		52.2023	39.2173		0.180319	0.166882
																			SOF

## Sheet: Red
	Label: JS_72hpe_Drugplate_061114												µ
	Time Stamp:	2014-11-06 18:04:00	Elapsed:	0	hours
																			RIM
	JS J4-JFHvirus Red PD 061114 Count (1/Well)															uM	log10					ST ERROR			% ERROR				AVG DMSO CONTROL			Normalised to DMSO control
		1	2	3	4	5	6	7	8	9	10	11	12			100	2		334	484		106.471	105.18		0.318777	0.217314			2917.62	2917.62		11.4477	16.5888
	A	2617.25	3218	3184.25	2774.25	3009.5	3460.5	2665	2733.5	2927.75	2119	2211.25	2023.5			56.2	1.74974		1743.5	2416.25		66.0057	130.349		0.0378581	0.0539466			2917.62	2917.62		59.7575	82.8156
	B	3269.25	3436.5	3126	3272.75	3433	3166.75	3719.75	3354.5	3095.25	3497.5	2426.25	2282.75			31.6	1.49969		2474	3057.75		211.523	148.928		0.0854985	0.0487051			2917.62	2917.62		84.795	104.803
	C	2880.25	3184	3378.25	3583.25	3480.75	3736.75	3385.25	3422.75	3556	3323.75	2071.25	2197.5			17.8	1.25042		3125.75	3446.5		372.604	234.798		0.119205	0.0681266			2917.62	2917.62		107.133	118.127
	D	2876.5	3494.25	3620.75	3497.75	3429.75	3730	3501	3535.5	3525	3511.5	2306.75	1484.25			10	1		2876.5	3494.25		162.547	285.201		0.0565087	0.0816201			2917.62	2917.62		98.5905	119.764
	E	3125.75	3446.5	3231.75	3566	3883.5	3696	4276.25	3583	3477.5	3412.5	1371.5	917.5			5.6	0.748188		2880.25	3184		195.644	200.32		0.067926	0.0629146			2917.62	2917.62		98.719	109.13
	F	2474	3057.75	2825.25	2859.75	3665.25	3982.75	3542.25	3651.5	579.75	839.25	330.75	282.75			3.16	0.499687		3269.25	3436.5		195.061	110.645		0.0596655	0.0321971			2917.62	2917.62		112.052	117.784
	G	1743.5	2416.25	2078	2491.25	3402.25	4109	3576.5	3907.5	0	16.75	20.25	37.25			0	0.25		2617.25	3218		103.813	174.514		0.0396651	0.0542306			2917.62	2917.62		89.7048	110.295
	H	334	484	1064.25	671.75	2805.25	2719.5	2040.5	2078.25	0	3.25	0	0
	Std Error																		LDS21
		1	2	3	4	5	6	7	8	9	10	11	12
	A	103.813	174.514	280.676	140.572	89.3574	239.934	210.011	253.069	156.648	113.623	154.035	211.559			31.6	1.49969		1064.25	671.75		251.423	145.008		0.236245	0.215866			2979.25	2979.25		35.7221	22.5476
	B	195.061	110.645	291.576	147.122	154.485	195.172	314.861	274.094	99.7099	353.974	42.6466	139.801			10	1		2078	2491.25		124.548	84.49		0.0599364	0.0339147			2979.25	2979.25		69.7491	83.62
	C	195.644	200.32	151.44	272.713	253.175	229.428	225.312	302.101	223.91	129.701	131.131	138.631			3.16	0.499687		2825.25	2859.75		119.525	385.776		0.042306	0.134898			2979.25	2979.25		94.8309	95.9889
	D	162.547	285.201	262.812	192.702	124.785	269.164	244.047	273.661	119.965	276.131	347.291	173.214			1	0		3231.75	3566		194.267	331.06		0.0601121	0.0928378			2979.25	2979.25		108.475	119.695
	E	372.604	234.798	194.267	331.06	376.103	365.827	460.149	173.456	217.29	158.112	216.618	72.6114			0.316	-0.500313		3620.75	3497.75		262.812	192.702		0.072585	0.0550932			2979.25	2979.25		121.532	117.404
	F	211.523	148.928	119.525	385.776	177.226	339.2	196.961	190.874	143.856	48.8115	81.6307	42.9348			0.1	-1		3378.25	3583.25		151.44	272.713		0.0448281	0.0761078			2979.25	2979.25		113.393	120.274
	G	66.0057	130.349	124.548	84.49	264.519	298.472	326.257	361.385	0	12.7892	12.9253	15.052			0.0316	-1.50031		3126	3272.75		291.576	147.122		0.0932745	0.0449536			2979.25	2979.25		104.926	109.851
	H	106.471	105.18	251.423	145.008	148.925	108.588	200.011	275.839	0	3.25	0	0			0	-2		3184.25	2774.25		280.676	140.572		0.0881452	0.0506702			2979.25	2979.25		106.881	93.1191
																			LDS21.8
																31.6	1.49969		2805.25	2719.5		148.925	108.588		0.053088	0.0399295			3235	3235		86.7156	84.0649
																10	1		3402.25	4109		264.519	298.472		0.0777482	0.0726386			3235	3235		105.17	127.017
																3.16	0.499687		3665.25	3982.75		177.226	339.2		0.048353	0.0851673			3235	3235		113.3	123.114
																1	0		3883.5	3696		376.103	365.827		0.0968464	0.0989791			3235	3235		120.046	114.25
																0.316	-0.500313		3429.75	3730		124.785	269.164		0.036383	0.0721619			3235	3235		106.02	115.301
																0.1	-1		3480.75	3736.75		253.175	229.428		0.0727358	0.0613978			3235	3235		107.597	115.51
																0.0316	-1.50031		3433	3166.75		154.485	195.172		0.0449999	0.0616316			3235	3235		106.121	97.8903
																0	-2		3009.5	3460.5		89.3574	239.934		0.0296918	0.069335			3235	3235		93.0294	106.971
																			LDS21.9
																31.6	1.49969		2040.5	2078.25		200.011	275.839		0.0980204	0.132726			3213.46	3213.46		63.4986	64.6733
																10	1		3576.5	3907.5		326.257	361.385		0.0912225	0.0924849			3213.46	3213.46		111.298	121.598
																3.16	0.499687		3542.25	3651.5		196.961	190.874		0.0556034	0.0522727			3213.46	3213.46		110.232	113.631
																1	0		4276.25	3583		460.149	173.456		0.107606	0.0484107			3213.46	3213.46		133.073	111.5
																0.316	-0.500313		3501	3535.5		244.047	273.661		0.0697078	0.0774038			3213.46	3213.46		108.948	110.022
																0.1	-1		3385.25	3422.75		225.312	302.101		0.0665571	0.0882627			3213.46	3213.46		105.346	106.513
																0.0316	-1.50031		3719.75	3354.5		314.861	274.094		0.0846457	0.0817093			3213.46	3213.46		115.755	104.389
																0	-2		2665	2733.5		210.011	253.069		0.0788033	0.0925805			3213.46	3213.46		82.9325	85.0641
																			SOF
																nM
																100000	5		0	3.25		0	3.25		#DIV/0!	1			3194.47	3194.47		0	0.101738
																10000	4		0	16.75		0	12.7892		#DIV/0!	0.763532			3194.47	3194.47		0	0.524344
																1000	3		579.75	839.25		143.856	48.8115		0.248134	0.0581609			3194.47	3194.47		18.1486	26.272
																100	2		3477.5	3412.5		217.29	158.112		0.0624844	0.0463332			3194.47	3194.47		108.86	106.825
																10	1		3525	3511.5		119.965	276.131		0.0340325	0.0786361			3194.47	3194.47		110.347	109.924
																1	0		3556	3323.75		223.91	129.701		0.0629669	0.0390223			3194.47	3194.47		111.317	104.047
																0.1	-1		3095.25	3497.5		99.7099	353.974		0.0322138	0.101208			3194.47	3194.47		96.894	109.486
																0	-2		2927.75	2119		156.648	113.623		0.0535045	0.053621			3194.47	3194.47		91.6506	66.3334
																			RADICICOL
																uM
																31.6	1.49969		0	0		0	0		#DIV/0!	#DIV/0!			2117.38	2117.38		0	0
																10	1		20.25	37.25		12.9253	15.052		0.638285	0.40408			2117.38	2117.38		0.956373	1.75925
																3.16	0.499687		330.75	282.75		81.6307	42.9348		0.246805	0.151847			2117.38	2117.38		15.6208	13.3538
																1	0		1371.5	917.5		216.618	72.6114		0.157942	0.0791405			2117.38	2117.38		64.7736	43.332
																0.316	-0.500313		2306.75	1484.25		347.291	173.214		0.150554	0.116702			2117.38	2117.38		108.944	70.0986
																0.1	-1		2071.25	2197.5		131.131	138.631		0.0633099	0.0630856			2117.38	2117.38		97.8216	103.784
																0.0316	-1.50031		2426.25	2282.75		42.6466	139.801		0.0175771	0.0612425			2117.38	2117.38		114.588	107.81
																0	-2		2211.25	2023.5		154.035	211.559		0.0696599	0.104551			2117.38	2117.38		104.434	95.5664

## Sheet: Confluency
	Label: JS_72hpe_Drugplate_061114													µ
	Time Stamp:	2014-11-06 18:04:00	Elapsed:	0	hours
	JS_J4-JFHvirus PD 061114 Confluence (Percent)
		1	2	3	4	5	6	7	8	9	10	11	12					RIM
	A	92.4838	98.2796	97.7374	98.4839	96.6073	97.8066	96.9348	96.2303	97.6188	94.0152	93.2498	84.9615		uM	log10
	B	97.5451	99.1791	99.5973	99.2947	99.3672	99.3035	99.5891	99.0901	98.2502	98.7428	96.7753	89.9424		100	2		33.6842	41.681		8.92108	8.09381
	C	98.494	99.4548	99.0753	99.4964	99.5962	99.2863	98.8192	99.2095	99.0614	98.1125	97.018	93.8133		56.2	1.74974		84.2859	94.7309		3.25436	2.38894
	D	96.3393	99.5419	99.6261	99.0594	99.2838	99.576	98.7965	99.0085	99.3102	98.7486	93.7693	79.5473		31.6	1.49969		93.1654	97.0629		2.08638	1.80302
	E	93.2888	99.207	99.2146	98.7601	98.9314	99.1549	99.1039	98.7095	99.0226	99.7182	72.3869	50.0041		17.8	1.25042		93.2888	99.207		2.2167	0.439356
	F	93.1654	97.0629	97.6855	98.665	98.2875	95.2124	99.2244	98.4718	99.6722	98.7702	29.8989	21.1308		10	1		96.3393	99.5419		0.832884	0.296241
	G	84.2859	94.7309	96.2325	96.5782	98.2328	98.2422	98.0784	95.9647	99.1413	97.6898	12.4279	9.7165		5.6	0.748188		98.494	99.4548		0.517689	0.110581
	H	33.6842	41.681	67.9277	52.992	87.6331	91.1864	86.2247	81.9693	91.6392	89.5841	0.273835	0.0128481		3.16	0.499687		97.5451	99.1791		0.635526	0.247524
															0	0.25		92.4838	98.2796		1.59492	0.244811
	Std Error
		1	2	3	4	5	6	7	8	9	10	11	12
	A	1.59492	0.244811	0.615876	0.166427	0.420411	0.398557	0.520915	0.869954	0.233788	1.4613	1.24619	3.00165					LDS21
	B	0.635526	0.247524	0.0517314	0.167501	0.160836	0.131527	0.188325	0.101628	0.283182	0.130695	0.71388	1.74662
	C	0.517689	0.110581	0.34057	0.115445	0.0999684	0.0852749	0.435147	0.320906	0.199213	0.531914	0.49606	0.729029		31.6	1.49969		67.9277	52.992		13.1145	9.49029
	D	0.832884	0.296241	0.0698278	0.250997	0.280583	0.137953	0.467807	0.185869	0.187091	0.416266	0.348853	3.23746		10	1		96.2325	96.5782		1.02265	1.48611
	E	2.2167	0.439356	0.316878	0.455046	0.353369	0.197548	0.514425	0.286685	0.20914	0.044319	5.19717	3.06506		3.16	0.499687		97.6855	98.665		1.59915	0.567728
	F	2.08638	1.80302	1.59915	0.567728	0.919059	2.20034	0.479242	0.623996	0.0627584	0.532215	4.99681	4.47334		1	0		99.2146	98.7601		0.316878	0.455046
	G	3.25436	2.38894	1.02265	1.48611	0.923628	0.709227	0.420723	2.18499	0.200132	0.941364	1.41493	1.70807		0.316	-0.500313		99.6261	99.0594		0.0698278	0.250997
	H	8.92108	8.09381	13.1145	9.49029	1.63287	3.52245	4.15024	7.67585	2.34616	1.91638	0.0396031	0.00496924		0.1	-1		99.0753	99.4964		0.34057	0.115445
															0.0316	-1.50031		99.5973	99.2947		0.0517314	0.167501
															0	-2		97.7374	98.4839		0.615876	0.166427
																		LDS21.8
															31.6	1.49969		87.6331	91.1864		1.63287	3.52245
															10	1		98.2328	98.2422		0.923628	0.709227
															3.16	0.499687		98.2875	95.2124		0.919059	2.20034
															1	0		98.9314	99.1549		0.353369	0.197548
															0.316	-0.500313		99.2838	99.576		0.280583	0.137953
															0.1	-1		99.5962	99.2863		0.0999684	0.0852749
															0.0316	-1.50031		99.3672	99.3035		0.160836	0.131527
															0	-2		96.6073	97.8066		0.420411	0.398557
																		LDS21.9
															31.6	1.49969		86.2247	81.9693		4.15024	7.67585
															10	1		98.0784	95.9647		0.420723	2.18499
															3.16	0.499687		99.2244	98.4718		0.479242	0.623996
															1	0		99.1039	98.7095		0.514425	0.286685
															0.316	-0.500313		98.7965	99.0085		0.467807	0.185869
															0.1	-1		98.8192	99.2095		0.435147	0.320906
															0.0316	-1.50031		99.5891	99.0901		0.188325	0.101628
															0	-2		96.9348	96.2303		0.520915	0.869954
																		SOF
															nM
															100000	5		91.6392	89.5841		2.34616	1.91638
															10000	4		99.1413	97.6898		0.200132	0.941364
															1000	3		99.6722	98.7702		0.0627584	0.532215
															100	2		99.0226	99.7182		0.20914	0.044319
															10	1		99.3102	98.7486		0.187091	0.416266
															1	0		99.0614	98.1125		0.199213	0.531914
															0.1	-1		98.2502	98.7428		0.283182	0.130695
															0	-2		97.6188	94.0152		0.233788	1.4613
																		Radicicol
															uM
															31.6	1.49969		0.273835	0.0128481		0.0396031	0.00496924
															10	1		12.4279	9.7165		1.41493	1.70807
															3.16	0.499687		29.8989	21.1308		4.99681	4.47334
															1	0		72.3869	50.0041		5.19717	3.06506
															0.316	-0.500313		93.7693	79.5473		0.348853	3.23746
															0.1	-1		97.018	93.8133		0.49606	0.729029
															0.0316	-1.50031		96.7753	89.9424		0.71388	1.74662
															0	-2		93.2498	84.9615		1.24619	3.00165
