# Supplementary material for: Rationally derived inhibitors of hepatitis C virus (HCV) p7 channel activity reveal prospect for bimodal antiviral therapy
Source: eLife journal article supplement (doi:10.7554/elife.52555), 2020-11-10
Supplement: fig1-figsupp1-data1 [file Exp 001 Chris Processing Definition Analysis.xlsx]

## Sheet: Plate 1 Extracellular raw data
	Label: JoeS-141014-plate1
	Time Stamp:	2014-10-14 13:30:00	Elapsed:	0	hours
	Red Object Count (1/Well)
		1	2	3	4	5	6	7	8	9	10	11	12
	A	1262.25	480.75	211	166.75	951.5	159.75	398.75	242	132.75	115.75	160	262		6250
	B	2317	542.25	279.5	211.25	218	334	1753.75	590	204.25	214.5	200.75	136		12500
	C	211	1074.75	562.75	306.5	303.25	255.5	2095.25	934.5	586.5	378.5	259	180.25		25000
	D	904	1958.75	1880	1641.25	450	252.5	2668.75	1330.75	1962	474	416	279.5		50000
	E	2880.25	207.5	91.5	197.5	129.25	2173.75	733.5	153	95	71	207.75	1214.5
	F	1979	78	225	149.75	91.75	194	1518.5	255.5	98.75	194	78	125.75
	G	16.75	67.75	166.5	37	201	61	306.75	102	20	231.75	153	190.5								2
	H	2852.75	173.5	1531.75	183.75	204.25	132.5	549	282.5	125.75	870	180.5	248.75								4
																					8
	Std Error																				16
		1	2	3	4	5	6	7	8	9	10	11	12								32
	A	1167.66	84.6939	46.7743	54.1531	713.151	23.1998	75.7247	26.4102	23.1998	26.487	58.2809	89.7227								64
	B	563.589	71.8347	86.9459	59.2908	28.9914	122.358	450.585	58.2223	24.1639	31.1033	34.6564	17.6871
	C	82.3721	75.3905	84.0866	75.9106	27.0104	50.0874	862.537	89.9208	119.975	60.7653	51.4101	13.0088
	D	591.597	246.43	488.39	576.393	143.449	20.5	503.933	53.5372	558.91	57.5138	39.5538	21.2818
	E	706.145	33.6588	60.8338	98.3145	48.0908	416.721	248.28	95.8636	33.86	32.6573	57.6373	760.421
	F	637.402	11.7118	58.1822	11.2278	56.1121	69.3518	632.502	79.4329	57.0751	24.5323	22.4981	19.6273
	G	10.0281	32.0868	91.4308	21.0515	33.9902	30.1413	280.401	46.9201	8.65063	30.9795	37.6364	42.8651
	H	724.743	66.1898	656.39	66.1027	72.5585	49.7753	140.136	61.9038	29.5927	111.325	32.8139	29.8227
		0.925064	0.17617	0.221679	0.324756	0.749502	0.145225	0.189905	0.109133	0.174763	0.22883	0.364256	0.342453
		0.243241	0.132475	0.311076	0.280666	0.132988	0.366342	0.256927	0.0986818	0.118306	0.145004	0.172634	0.130052											Error
		0.390389	0.070147	0.149421	0.247669	0.0890698	0.196037	0.411663	0.0962234	0.204561	0.160542	0.198495	0.0721709
		0.654422	0.12581	0.259782	0.351192	0.318775	0.0811881	0.188828	0.0402308	0.284867	0.121337	0.0950812	0.0761425		25K CELLS	CLARIF	2095.25	934.5	586.5	378.5	259	180.25		862.537	89.9208	119.975	60.7653	51.4101	13.0088		25,000 cells Clarified
		0.245168	0.162211	0.66485	0.497795	0.372076	0.191706	0.338487	0.62656	0.356421	0.459962	0.277436	0.626119			UNCLARIF	211	1074.75	562.75	306.5	303.25	255.5		82.3721	75.3905	84.0866	75.9106	27.0104	50.0874		25,000 cells Unlarified
		0.322083	0.150152	0.258588	0.0749767	0.611575	0.357483	0.416531	0.310892	0.577975	0.126455	0.288438	0.156082		12.5K CELLS	CLARIF	1753.75	590	204.25	214.5	200.75	136		450.585	58.2223	24.1639	31.1033	34.6564	17.6871		12,500 cells Clarified
		0.598692	0.473606	0.549134	0.56896	0.169105	0.49412	0.914102	0.460001	0.432531	0.133676	0.24599	0.225014			UNCLARIF	2317	542.25	279.5	211.25	218	334		563.589	71.8347	86.9459	59.2908	28.9914	122.358		12,500 cells Unclarified
		0.254051	0.381497	0.428523	0.359742	0.355243	0.375663	0.255256	0.219129	0.23533	0.127959	0.181794	0.11989
																25K CELLS
																WT 4X	GND 4X		WT 8X	GND 8X		WT 62X	GND 62X
																																	WT
														clarif		934.5	30.5		586.5	67.75		180.25	33.75		89.9208	17.8396	119.975	35.5771	13.0088	21.1478			GND
														unclairf		1074.75	6.5		562.75	30.25		255.5	6.5		75.3905	3.75278	84.0866	13.9665	50.0874	3.75278
																																	WT
																																	GND
																																	WT
																																	GND

## Sheet: Plate 2 GND raw data
Label: JS-141014-plate 2
Time Stamp:	2014-10-14 14:00:00	Elapsed:	0	hours
Red Object Count (1/Well)
	1	2	3	4	5	6	7	8	9	10	11	12
A	85.25	57.25	26.75	30.25	16.75	78	2924.25	57.5	54	37	27	163.25
B	2061	16.5	57.25	33.75	23.25	33.5	986	528.5	91.75	13	47.25	818.5
C	416	30.5	67.75	26.75	20.25	33.75	1706	1910.5	17	23.75	20.25	30.25
D	1573	26.5	23.25	20	16.75	47.25	1255.5	13.25	47.5	26.5	40.25	40.5
E	1825.5	44	40.5	64.25	47.25	2498	2566.25	33.5	30.25	23.5	20.25	252.25
F	2224.5	23.5	47	33.75	37	20	610.5	1415.75	74.75	30.25	54.25	37
G	47.5	6.5	30.25	88.25	23.25	6.5	1269	1689	44	43.75	71.25	67.75
H	1211	129	197.5	160	1050.5	238.25	2020	1136	33.75	1638	2289.5	115.5
Std Error																						Extra
	1	2	3	4	5	6	7	8	9	10	11	12										Clarif
A	85.25	23.1998	18.3411	19.3665	12.7892	25.7844	685.481	27.3084	14.7366	15.0333	14.7366	69.2717
B	484.194	3.5	10.3067	12.9253	6.48556	11.644	307.353	249.967	30.2335	0	16.2089	644.519
C	402.777	17.8396	35.5771	9.42846	16.2089	21.1478	91.2971	511.241	17	16.0643	12.9253	11.4918
D	722.582	7.79423	6.48556	11.7402	10.0281	27.445	532.215	9.42846	21.1207	7.79423	16.6702	27.7203
E	830.953	20.2608	17.4284	18.8387	20.25	548.308	386.499	8.77971	13.9665	8.4113	16.2089	130.61
F	418.048	15.1465	25.7973	14.1326	6.44205	11.7402	370.462	701.864	29.7668	8.57686	21.6617	21.0515
G	23.2755	3.75278	13.9665	61.8296	6.48556	3.75278	477.064	397.705	18.6413	21.6694	25.6852	27.8429
H	453.988	30.8626	54.2379	39.3044	570.691	78.9191	361.337	471.444	16.9871	626.617	1085.94	48.0789
																						Extra
																						Unclarif

## Sheet: Extracellular Analysis
		25k cells clarified JFH1
		Fold dilution
		2	4	8	16	32	64
		2095.25	934.5	586.5	378.5	259	180.25
SE		862.537	89.9208	119.975	60.7653	51.4101	13.0088
% SE Error		0.411663	0.0962234	0.204561	0.160542	0.198495	0.0721709
		Red cells/well accounting for dilution
		4190.5	3738	4692	6056	8288	11536
		Red cells/ml
		41905	37380	46920	60560	82880	115360
% SE Error		0.411663	0.0962234	0.204561	0.160542	0.198495	0.0721709
															2-fold dilution large error
															16-64 fold dilution overestimate 'titre'
															AVG of 4-fold and 8-fold dilutions gives most accurate titre							42150	NS5A +ve cells/ml
																						6745.8	SD error
																						0.160043	% Errror

## Sheet: Plate 3 Intracellular raw data
Label: JS-141014-plate 3
Time Stamp:	2014-10-14 15:30:00	Elapsed:	0	hours
				Intracellular data
Red Object Count (1/Well)
	1	2	3	4	5	6	7	8	9	10	11	12
A	395.5	95	40.25	47.25	13.25	1699.5	1777.75	27	9.75	6.5	0	160.25
B	429.5	218	94.75	30	36.75	16.75	1590.25	654.75	50.5	20.25	13.5	27
C	818.75	873.25	115.75	98.75	37.25	6.5	1402.5	1013.25	71.25	81.5	33.5	64.25
D	1146.5	289.75	132.5	84.75	20	20	641.25	201	85	50.5	64.25	20.25
E	787.75	9.75	6.75	3.25	3.25	1255.5	2040.5	10	3.25	20.25	30.5	16.75
F	211	614	10	6.75	3.25	9.75	706.25	508	16.75	13.25	23.25	13.5
G	876.5	1098.5	10	3.25	16.75	10	740.5	737	20.25	3.25	16.5	16.75
H	637.5	194	136	788.25	10	64.5	1904	30.25	95	627.75	1781.25	34
Std Error
	1	2	3	4	5	6	7	8	9	10	11	12
A	337.313	27.8837	14.6593	23.848	5.51324	618.979	572.933	14.7366	3.25	3.75278	0	151.384
B	170.128	99.6017	28.9522	10.2225	3.25	10.0281	613.085	515.135	11.565	6.75	13.5	16.6032
C	152.462	304.145	28.2353	19.6273	15.052	3.75278	580.262	603.749	35.8199	12.5067	8.77971	42.7266
D	329.083	48.7055	18.0301	28.5084	8.65063	8.65063	373.679	24.6712	14.148	20.5122	30.75	6.75
E	499.626	3.25	6.75	3.25	3.25	194.463	400.418	6.44205	3.25	12.9253	30.5	12.7892
F	159.04	456.714	6.44205	6.75	3.25	3.25	305.631	499.343	6.48556	9.42846	6.48556	13.5
G	487.861	630.505	6.44205	3.25	6.48556	10	573.135	488.862	12.9253	3.25	8.4113	10.0281
H	344.969	132.677	105.012	463.215	6.44205	26.9583	553.932	15.0907	57.1125	623.424	980.466	19.6299
	0.852879	0.293513	0.364207	0.50472	0.416094	0.364212	0.32228	0.545799	0.333333	0.57735	#DIV/0!	0.944673
	0.396106	0.456889	0.305564	0.340751	0.0884354	0.598692	0.385527	0.786767	0.22901	0.333333	1	0.614934
	0.186213	0.348291	0.243933	0.198757	0.40408	0.57735	0.413734	0.595853	0.502735	0.153456	0.262081	0.665005
	0.287033	0.168095	0.136076	0.336382	0.432531	0.432531	0.582736	0.122742	0.166447	0.406182	0.478599	0.333333
	0.634245	0.333333	1	1	1	0.154889	0.196235	0.644205	1	0.638285	1	0.763532
	0.753743	0.743834	0.644205	1	1	0.333333	0.432752	0.982958	0.387198	0.711582	0.278949	1
	0.556601	0.573969	0.644205	1	0.387198	1	0.773984	0.663314	0.638285	1	0.509776	0.598692
	0.541127	0.683902	0.772146	0.58765	0.644205	0.417958	0.29093	0.498866	0.601184	0.993109	0.550437	0.57735

## Sheet: JS Analysis v2 read
Label: JoeS-141014-plate1
Time Stamp:	2014-10-14 13:30:00	Elapsed:	0	hours
JoeS JFH 96 well Analysis v2 Phase Count (1/Well)
	1	2	3	4	5	6	7	8	9	10	11	12
A	7183.75	2125.75	1556	1951.75	1596.75	1716.25	2204.25	1719.5	1422.75	2559.5	2286.5	2044
B	9327.25	1153.25	1511.25	1480.75	1467	1228.25	1105	1436.25	1160.25	1098.25	1241.75	1893.75
C	10760.8	1317	1129.25	907.25	1225	1057.75	7515	1235	1023.75	1385.25	1569.5	1719.75
D	18385.5	1115.75	1825.5	1235.25	1279.5	879.75	1866.5	1402.25	5569.75	996.25	1470.5	2163.25
E	12668.8	1146.5	1160	1579.75	1231.5	5754.25	1955.25	1678.75	1603.75	1535.5	1753.75	7617.25
F	8248.75	1259	719.75	1122.25	886.75	1344	2105.25	1484	1232	1402.5	1395.25	1651.25
G	8088.5	1112	849.25	821.75	1323.75	1184	6679	1436.5	1132.5	2559	1562.75	2532.25
H	12389	2412.5	6317	1463.75	2125.75	1566.25	2409	2992.75	2009.75	1767.5	2593.5	3067.75
Std Error
	1	2	3	4	5	6	7	8	9	10	11	12
A	3024.14	314.836	236.055	209.521	258.675	310.161	135.489	140.091	217.419	248.67	281.116	156.191
B	2333.86	185.304	191.376	35.98	182.577	133.823	266.703	65.3393	166.757	272.187	197.763	395.329
C	5085.73	153.518	215.003	147.717	120.52	105.56	3460.76	160.766	87.5399	134.356	424.976	324.687
D	5302.91	211.689	205.963	184.583	207.214	131.237	359.351	328.134	2062.65	162.522	154.825	572.224
E	3887.5	113.814	191.351	311.541	173.258	3823.73	241.897	269.088	194.527	326.35	287.144	2397.7
F	2794.03	150.713	42.1137	185.431	227.451	268.729	561.529	298.412	285.544	264.373	156.065	232.598
G	2609.95	193.675	174.175	146.643	194.398	299.421	3527.52	145.892	101.197	140.002	342.6	754.915
H	3799.49	479.503	2948.05	331.176	294.635	118.768	268.553	236.897	194.231	355.74	284.801	405.748
	0.42097	0.148106	0.151707	0.10735	0.162001	0.18072	0.0614674	0.0814718	0.152816	0.0971557	0.122946	0.0764142
	0.250219	0.16068	0.126634	0.0242985	0.124456	0.108955	0.24136	0.045493	0.143725	0.247837	0.159262	0.208755
	0.472619	0.116567	0.190395	0.162819	0.098384	0.0997966	0.460514	0.130175	0.085509	0.0969901	0.270771	0.188799
	0.288429	0.189728	0.112826	0.14943	0.161949	0.149175	0.192526	0.234005	0.37033	0.163133	0.105287	0.264521
	0.306858	0.0992713	0.164958	0.197209	0.140688	0.664505	0.123716	0.160291	0.121295	0.212536	0.163732	0.314773
	0.338722	0.119709	0.0585116	0.165231	0.256499	0.199947	0.266728	0.201086	0.231772	0.188501	0.111854	0.140862
	0.322674	0.174169	0.205093	0.178452	0.146854	0.25289	0.52815	0.101561	0.0893575	0.0547098	0.219229	0.29812
	0.306682	0.198758	0.466686	0.226252	0.138603	0.0758297	0.111479	0.079157	0.0966444	0.201267	0.109813	0.132263
