# Supplementary material for: Rationally derived inhibitors of hepatitis C virus (HCV) p7 channel activity reveal prospect for bimodal antiviral therapy
Source: eLife journal article supplement (doi:10.7554/elife.52555), 2020-11-10
Supplement: fig1-figsupp1-data1 [file Exp 001.xlsx]

## Sheet: Experimental setup
	Exp #001 -
Aim	To test sensitivity of incucyte to different cell numbers seeded after electroporation and to assess requirement to clarify supernatant before infection of naïve cells
Mon
2014-10-06	Electroporate 5 µg RNA into cells (5 µl @ 1 µg/µl)
						Resuspend in (ml media)			Cell density/ml		cells/well (100 µl seeded)
	#1	J4-JFH1	Huh7	Old RNA		8			500000		50000
	#2	JFH1	Huh7
	#3	JFH1 GND	Huh7						Fold dilution		cells/well
								A	0		50000
								B	2		25000
								C	4		12500
								D	8		6250
	Plate layout
Unclarified		A#1u	B#1u	C#1u	D#1u
Clarified		A#1c	B#1c	C#1c	D#1c
Unclarified		A#2u	B#2u	C#2u	D#2u
Clarified		A#2c	B#2c	C#2c	D#2c
Unclarified		A#3u	B#3u	C#3u	D#3u
Clarified		A#3c	B#3c	C#3c	D#3c
		Transfer 96 well plate to CatIII within 4h
		Incubate 72h
Thu
2014-10-09	Seed Huh7s for infection			Dilute to cells/ml			cells/well (100 µl seeded)
				80000			8000
	Incubate 6h
	Do 2-fold dilution series of extracellular infectivity for unclarified.
		Move 100 µl supernatant from virus well A#1u-D#1u to well H1-E1													Plate layout - Plate 1 (Extracellular) and Plate 2 (Intracellular)
		Add PBS (100 µl) to virus well A#1u-D#1u
														JFH1	D#2u 2	4	8	16	32	64	D#2c 2	4	8	16	32	64
	Do 2-fold dilution series of extracellular infectivity for clarified.													JFH1	C#2u 2	4	8	16	32	64	C#2c 2	4	8	16	32	64
		Move 100 µl supernatant from virus well A#1c-D#1c to eppendorfs - spin 2000 g 3 min - move supernatant to fresh eppendorfs												JFH1	B#2u 2	4	8	16	32	64	B#2c 2	4	8	16	32	64
		Add PBS (100 µl) to virus well A#1c-D#1c												JFH1	A#2u 2	4	8	16	32	64	A#2c 2	4	8	16	32	64
		Move 100 µl clarified supernatant (A#1c-D#1c) to well H7-E7												J4-JFH1	D#1u 2	4	8	16	32	64	D#1c 2	4	8	16	32	64
														J4-JFH1	C#1u 2	4	8	16	32	64	C#1c 2	4	8	16	32	64
	Repeat both above steps #2 unclarified and clarified into wells D1-A1 and D7-A7 same plate													J4-JFH1	B#1u 2	4	8	16	32	64	B#1c 2	4	8	16	32	64
	Repeat both above steps #3 unclarified and clarified into wells H1-E1 and D7-A7 different plate													J4-JFH1	A#1u 2	4	8	16	32	64	A#1c 2	4	8	16	32	64
		Serial dilution 100 µl from well 1 to well 2, well 2 to well 3 so on… (to well 6 - 6x 2-fold dilutions)													Unclarified	Unclarified	Unclarified	Unclarified	Unclarified	Unclarified	Clarified	Clarified	Clarified	Clarified	Clarified	Clarified
															1x above plate for extracellular and 1x above plate for intracellular
	Incubate 48h
															Plate layout - Plate 3 - GND Extracellular and Intracellular
5 x freeze-thaws	Freeze plates in PBS -> -80˚C 3-5 min
	Thaw frozen plate; pipette up and down well - 37˚C incubator													JFH1 GND	D#3c 2	4	8	16	32	64	D#3c 2	4	8	16	32	64
	Freeze plates in PBS -> -80˚C 3-5 min													JFH1 GND	C#3c 2	4	8	16	32	64	C#3c 2	4	8	16	32	64
	Thaw frozen plate; pipette up and down well - 37˚C incubator													JFH1 GND	B#3c 2	4	8	16	32	64	B#3c 2	4	8	16	32	64
	Freeze plates in PBS -> -80˚C 3-5 min													JFH1 GND	A#3c 2	4	8	16	32	64	A#3c 2	4	8	16	32	64
	Thaw frozen plate; pipette up and down well - 37˚C incubator													JFH1 GND	D#3u 2	4	8	16	32	64	D#3u 2	4	8	16	32	64
	Freeze plates in PBS -> -80˚C 3-5 min													JFH1 GND	C#3u 2	4	8	16	32	64	C#3u 2	4	8	16	32	64
	Thaw frozen plate; pipette up and down well - 37˚C incubator													JFH1 GND	B#3u 2	4	8	16	32	64	B#3u 2	4	8	16	32	64
	Freeze plates in PBS -> -80˚C 3-5 min													JFH1 GND	A#3u 2	4	8	16	32	64	A#3u 2	4	8	16	32	64
	Thaw frozen plate; pipette up and down well - 37˚C incubator
															Extra	Extra	Extra	Extra	Extra	Extra	Intra	Intra	Intra	Intra	Intra	Intra
	Repeat as above for clarified and unclarified intracellular using 100 µl freeze-thawed PBS

## Sheet: Plate layout
		#1	J4-JFH1		Huh7
		#2	JFH1		Huh7
		#3	JFH1 GND		Huh7
											Unclarified
			Fold dilution								Clarified
			2	4	8	16	32	64	2	4	8	16	32	64
	Cells seeded
#2 JFH1	6250
	12500
	25000
	50000
#1 J4-JFH1	6250
	12500
	25000
	50000
			1x plate for extracellular = Plate 1
			1x plate for intracellular = Plate 3
											Unclarified
			Fold dilution								Clarified
			2	4	8	16	32	64	2	4	8	16	32	64
	Cells seeded
#3 JFH1 GND Extracellular	6250
	12500
	25000
	50000
#3 JFH1 GND Intracellular	6250
	12500
	25000
	50000
			1x plate with extracellular and intracellular for GND = Plate 2

## Sheet: Plate 1 Analysis
Label: JoeS-141014-plate1
Metric: HS 15.10.14 JS Images Plate 1 Red Count (1/Well)
Cell Type:
Passage: 1
Notes:
Analysis Job: 15.10.14 HS PD, JS Plate 1
																								# cells	Fold dilution
Time Stamp:	2014-10-14 13:30:00	Elapsed:	0	hours
																								50000	2
HS 15.10.14 JS Images Plate 1 Red Count (1/Well)														Cell#										25000	4
	1	2	3	4	5	6	7	8	9	10	11	12												12500	8
A	3020.25	358	115.5	94.75	269	74.5	303.25	163.25	84.5	74.5	95.25	146.25		6250										6250	16
B	3607	433	221.25	132.5	156.5	323.75	1040.25	528.5	197.75	180.5	125.5	119		12500											32
C	2279.5	1051	525	272.5	201	166.75	2805	873.5	617.25	334.25	197.25	91.5		25000											64
D	3559.5	1678.75	1153	593.5	221.5	190.75	2218	1265.75	1296.25	416	300	177		50000
E	3511.5	78	10	85	85	716	221.25	50.75	54	30.5	139.5	3573
F	2385.5	47.25	57.5	54	40.75	91.5	2023.25	180.5	47.5	105.25	37	71.25
G	3641.25	37	40.5	13.5	176.75	23.75	3385	54.25	9.75	105.25	84.75	108.5
H	1702.5	44	296.25	64.5	98.25	57.5	204.25	156.25	50.5	368	78.25	122.25
Std Error
	1	2	3	4	5	6	7	8	9	10	11	12
A	1034.17	33.9902	28.788	25.5681	190.207	16.1735	89.0228	20.1551	17.1002	13.1434	49.5604	43.6756
B	608.216	66.4442	73.6743	49.7753	45.2226	224.379	168.69	36.7435	18.048	17.8396	36.2962	11.7118
C	315.122	83.6909	113.763	59.6357	35.0024	20.4425	242.803	111.724	134.93	48.7415	57.9962	15.1465
D	645.338	150.162	178.342	85.4308	35.6102	26.3292	302.199	48.0423	334.495	59.7467	28.7952	12.4164
E	1014.14	25.7844	6.44205	41.1906	39.5453	405.901	85.8578	29.6124	23.6714	14.0268	48.3985	1288.41
F	814.514	13.187	17.1002	21.4515	26.0684	46.9494	945.705	53.4174	35.4436	20.4425	6.44205	14.209
G	575.478	18.6413	19.9854	13.5	71.0837	16.0643	634.468	21.6617	3.25	8.6446	34.0988	26.7722
H	860.866	23.2128	89.3443	33.1021	39.5377	29.2019	58.5696	40.3843	11.565	60.3504	10.25	16.6702
	0.342413	0.0949447	0.249247	0.269848	0.707087	0.217094	0.293562	0.123462	0.202369	0.176422	0.520319	0.298637
	0.168621	0.153451	0.332991	0.375663	0.288962	0.693061	0.162163	0.0695241	0.0912666	0.0988341	0.289213	0.0984187
	0.138242	0.0796298	0.216691	0.218847	0.174141	0.122594	0.0865607	0.127904	0.218599	0.145823	0.294024	0.165536
	0.1813	0.0894486	0.154676	0.143944	0.160768	0.13803	0.136248	0.0379556	0.258048	0.143622	0.0959842	0.0701491
	0.288805	0.330569	0.644205	0.484595	0.465239	0.5669	0.388058	0.583496	0.438359	0.459894	0.346943	0.360596
	0.341444	0.279089	0.297395	0.39725	0.639716	0.513109	0.467419	0.295941	0.746181	0.194228	0.174109	0.199425
	0.158044	0.50382	0.493467	1	0.402171	0.676392	0.187435	0.399294	0.333333	0.082134	0.402346	0.246748
	0.505648	0.527563	0.301584	0.513211	0.402419	0.507859	0.286754	0.25846	0.22901	0.163996	0.13099	0.136362

## Sheet: Plate 2 Analysis
Label: JS-141014-plate 2
Metric: HS 15.10.14 JS Images Plate 1 Red Count (1/Well)
Cell Type:
Passage: 1
Notes:
Analysis Job: JS-141014-plate 2 (HS PD)
Time Stamp:	2014-10-14 14:00:00	Elapsed:	0	hours					GND PLATE
HS 15.10.14 JS Images Plate 1 Red Count (1/Well)
	1	2	3	4	5	6	7	8	9	10	11	12
A	2232	47.25	16.75	6.75	10	27	808.25	30.25	40.25	23.5	3.25	64.5
B	2238.5	20	33.5	16.5	10	20.25	624.25	94.75	54.25	13	26.75	142.75
C	2801.5	20	30.5	10	13.5	23.75	869.75	962	13.25	16.75	13.5	10
D	2351	20	16.5	23.5	20.25	20.25	1136.25	13.5	27	13.25	13.5	37.25
E	3190.75	37	37.25	16.5	20.25	1023.5	760.5	10	9.75	9.75	13.25	50.5
F	556	16.75	30.25	30.25	16.75	20	173.5	167	40.25	20	40.75	16.75
G	3767.75	6.5	9.75	57.75	16.5	0	1822.25	1125.75	23.5	27	40.5	30.5
H	1316.75	67.75	112	67.75	347.5	142.75	494.5	354.5	16.5	856.25	405.75	57.5
Std Error
	1	2	3	4	5	6	7	8	9	10	11	12
A	1227.6	21.3087	10.0281	6.75	6.44205	14.7366	257.095	15.0907	14.6593	8.4113	3.25	30.0735
B	820.859	11.7402	8.77971	8.4113	6.44205	6.75	533.824	31.9801	29.3949	0	9.66415	70.1645
C	531.476	11.547	22.4221	6.44205	7.79423	16.0643	376.798	460.85	9.42846	10.0281	7.79423	6.44205
D	492.635	11.7402	8.4113	19.41	12.9253	16.2089	711.758	13.5	11.0227	5.51324	7.79423	24.5437
E	882.45	12.7672	20.2747	3.5	12.9253	419.61	278.713	6.44205	3.25	3.25	9.42846	15.1465
F	70.4	12.7892	17.7922	11.4918	6.48556	11.7402	99.5335	63.6069	16.6702	4.04145	16.6702	10.0281
G	394.696	3.75278	3.25	44.7574	3.5	0	465.209	677.277	11.565	14.7366	19.9854	17.8396
H	204.182	14.6593	34.0906	9.66415	182.289	58.7117	159.144	96.9557	8.4113	371.572	136.922	37.0011

## Sheet: Plate 3 Analysis
Label: JS-141014-plate 3
Metric: HS 15.10.14 JS Images Plate 1 Red Count (1/Well)
Cell Type:
Passage: 1
Notes:
Analysis Job: JS-141014-plate 3 (HS PD)
Time Stamp:	2014-10-14 15:30:00	Elapsed:	0	hours
HS 15.10.14 JS Images Plate 1 Red Count (1/Well)
	1	2	3	4	5	6	7	8	9	10	11	12
A	2023.75	67.5	43.75	47.25	6.5	412.5	941.5	27	13.5	6.5	0	16.75
B	194	1829	102	26.75	30.25	0	429.75	678.75	47	23.5	13.5	20
C	1354.5	525.25	122.25	88.25	37	6.5	1303.5	1160	54	77.75	33.5	26.75
D	685.5	269	119	95	23.5	6.75	289.75	190.5	105.25	44	54.25	20
E	139.25	3.25	3.25	3.25	0	317	457	3.25	0	13.5	3.25	13.5
F	54	556	10	3.25	0	6.5	95	1071.25	16.75	13.25	10	10
G	453.75	197.25	6.5	3.25	16.5	0	1716.25	579.75	6.5	3.25	16.75	3.25
H	136	43.75	47.25	2109	3.25	23.5	549	13.25	33.75	1934.5	1258.75	3.25
Std Error
	1	2	3	4	5	6	7	8	9	10	11	12
A	647.362	16.8745	17.9507	23.848	3.75278	218.081	246.051	14.7366	7.79423	3.75278	0	12.7892
B	48.4338	137.401	24.0139	13.75	3.25	0	135.54	314.372	4.04145	8.4113	13.5	11.547
C	505.466	175.712	28.9522	16.2089	16.8671	3.75278	437.1	436.516	22.8728	17.0508	8.77971	18.3411
D	262.288	54.789	24.5323	34.4383	8.4113	6.75	94.4664	16.8745	16.3114	21.9165	33.2726	8.65063
E	99.997	3.25	3.25	3.25	0	176.708	141.473	3.25	0	13.5	3.25	13.5
F	37.276	449.074	6.44205	3.25	0	3.75278	27.8837	824.263	6.48556	9.42846	6.44205	10
G	318.452	102.717	3.75278	3.25	8.4113	0	482.878	322.812	3.75278	3.25	6.48556	3.25
H	97.085	27.3812	34.25	860.843	3.25	11.565	227.366	5.51324	21.1478	619.954	704.889	3.25
	25,000 cells
	unclarified
									2
									4
WT	1354.5	525.25	122.25	88.25	37	6.5			8
GND	3767.75	6.5	9.75	57.75	16.5	0			16
									32
									64
SE Error	505.466	175.712	28.9522	16.2089	16.8671	3.75278
SE Error	394.696	3.75278	3.25	44.7574	3.5	0

## Sheet: Key data
						JFH1 (#2) - Extracellular - Plate 1
							2805	873.5	617.25	334.25	197.25	91.5		25,000 cells Clarified
							2279.5	1051	525	272.5	201	166.75		25,000 cells Unclarified
							1040.25	528.5	197.75	180.5	125.5	119		12,500 cells Clarified
							3607	433	221.25	132.5	156.5	323.75		12,500 cells Unclarified
	Fold dilution
							242.803	111.724	134.93	48.7415	57.9962	15.1465		SE Error for above
	2						315.122	83.6909	113.763	59.6357	35.0024	20.4425
	4						168.69	36.7435	18.048	17.8396	36.2962	11.7118
	8						608.216	66.4442	73.6743	49.7753	45.2226	224.379
	16
	32
	64
	25K cells
			WT	GND		WT	GND		WT	GND
			4-FOLD	4-FOLD		8-FOLD	8-FOLD		64-FOLD	64-FOLD
	Clarified		873.5	94.75		617.25	54.25		91.5	142.75
	Unclarified		1051	33.5		525	16.5		166.75	20.25
			111.724	31.9801		134.93	29.3949		15.1465	70.1645
			83.6909	8.77971		113.763	8.4113		20.4425	6.75
	Unclarified
	25,000 cells
	1:4 dilution
			1051	33.5		525.25	6.5
			83.6909	8.77971		175.712	3.75278
			WT	GND		WT	GND

## Sheet: Figures
				25k cells clarified JFH1
													NOTE - I MANUALLY COUNTED CLARIFIED 1:4 DILUTION (JFH1, 25,000 CELLS) NS5A +ve CELLS
				Fold dilution									INCUCYTE READ 873.5 NS5A +ve CELLS / WELL
				2	4	8	16	32	64				MANUALLY COUNTED 583 NS5A +ve CELLS IN WELL WITH FAIRLY STRINGENT CUT-OFF
		NS5A +ve / well		2805	873.5	617.25	334.25	197.25	91.5
		SE		242.803	111.724	134.93	48.7415	57.9962	15.1465
		% SE Error		0.0865607	0.127904	0.218599	0.145823	0.294024	0.165536
				Red cells/well accounting for dilution
				5610	3494	4938	5348	6312	5856
				Red cells/ml
				56100	34940	49380	53480	63120	58560
		% SE Error		0.0865607	0.127904	0.218599	0.145823	0.294024	0.165536
Conclusions:		Incucyte can accurately count NS5A +ve cells over 2-fold dilution series but processing definition has to hbe optimised to key dilutions (e.g. current definition performs poorly for 1:2 dilution, high GND background)
		12,500 - 25,000 cells is a reasonable number to seed 4 h.p.e for good signal-to-noise and minimal confluency - 50,000 is too many.
		1:4 dilution (or perhaps 1:8) best for highest signal-to-noise within a linear range which can accurately calculate virus 'titre' from NS5A +ve cells and hence can accurately quantify infectivity.
		Using 25,000 cells and 1:4 dilution, clarification of the supernatant is not necessary.
		Intracellular infectivity can be quantified over a linear range using the same conditions with signal above background at 1:4 dilution.
