# Supplementary material for: Rationally derived inhibitors of hepatitis C virus (HCV) p7 channel activity reveal prospect for bimodal antiviral therapy
Source: eLife journal article supplement (doi:10.7554/elife.52555), 2020-11-10
Supplement: fig1-figsupp1-data1 [file Exp 003.xlsx]

## Sheet: Experimental Procedure
	Exp #003 -
Aim(s)	Confirm transcripts of J4-JFH1 produce virus and copmpare to JFH1
	Test fixing and staining @ 72 hpe for analysis of anti-viral effects 72 hpe and analysis of cytotoxicity
Day 1	Friday	Electroporate 5 µg RNA into cells (5 µl @ 1 µg/µl)
	2014-10-31
					RNA stock						Resuspend in (ml media)			Cell density/ml		cells/well
		#1	JFH1		From Exp#001+002		5 µg				16			250000		25000
		#2	JFH1 GND		From Exp#001+002		5 µg
		#3	J4-JFH1		2014-10-28		5 µg
		#4	J4-JFH1		2014-10-28		10 µg
		Single well seeded for all												Plate layout
			Transfer 96 well plate to CatIII within 4h
			Incubate 72h												#1	#2	#3	#4
		Seed 1/2 plate of JFH1
		at 4 hpe treat with dose response of drugs
Day 4	Monday	Seed cells for infection (Huh7)					Dilute to cells/ml			cells/well (100 µl seeded)
	2014-11-03	Incubate 6h					80000			8000				Drug plate
														Inhibitor	Concentration (0.25 % DMSO)
		Need 2x 1/2 plates for serial dilutions (5x) and 1:4 dilution of drug plate													100	56.2	31.6	17.8	10	5.6	3.16	0	µM	RIM
															100	56.2	31.6	17.8	10	5.6	3.16	0	µM	RIM
		Move supernatant (unclarified) onto 2-fold dilution wells													31.6	10	3.16	1	0.316	0.1	0.0316	0	µM	LDS21
		Perform 2-fold diluton series													31.6	10	3.16	1	0.316	0.1	0.0316	0	µM	LDS21
															31.6	10	3.16	1	0.316	0.1	0.0316	0	µM	LDS21.8
		Perform 1:4 dilution of drug plate													31.6	10	3.16	1	0.316	0.1	0.0316	0	µM	LDS21.8
		Incubate 48h													31.6	10	3.16	1	0.316	0.1	0.0316	0	µM	LDS21.9
															31.6	10	3.16	1	0.316	0.1	0.0316	0	µM	LDS21.9
		Remove remaining media -> waste, wash 2x PBS and fix in PFA													100000	10000	1000	100	10	1	0.1	0	nM	SOF
		Remove from CatIII, wash in PBS -> LIMM													100000	10000	1000	100	10	1	0.1	0	nM	SOF
		Stain, image and analyse													31600	10000	3160	1000	316	100	31.6	0	nM	Hsp90i
															31600	10000	3160	1000	316	100	31.6	0	nM	Hsp90i
Day 6	Wednesday	Wash cells 2x (< 100 µl PBS)
	2014-11-05	Fix in 100 µl 3-4% PFA
		TAKE OUT OF CATIII
		Wash 3-4x PBS
		Primary Ab o/n
		Secondary Ab 4h

## Sheet: Experimental details
2014-10-31
	Huh7	Pooled 2x T175 -> 20 ml. Split new flask 1:10 leaving 18 ml
		43	47		88.5 x 10^4 / ml
		36	51
		Resuspend in 1.6 ml DEPC-PBS to 1 x 10^7 cells/ ml
		#1	JFH1 -> Huh7		TC 30.0	266 V	5 µg	5 µl
		#2	JFH1 GND -> Huh7		TC 31.4	267 V	5 µg	8 µl
		#3	J4-JFH1 -> Huh7		TC 31.6	268 V	5 µg	5.2 µl
		#4	J4-JFH1 -> Huh7		TC 32.2	266 V	10 µg	10.4 µl
	Dose repsone curves made @ 400x in DMSO
	diluted 1:20 (5 µl in 95 µl media) into intermediate plate
	diluted 1:20 (10 µl in 190 µl media) into final plate
	Rimantadine		Sigma stock (Claire)
	LDS21		Fresh stock from 5mg from Chembridge 31/10/14
	LDS21.8		Fresh stock from 5mg from Chembridge 31/10/14
	LDS21.9		Fresh stock from 5mg from Chembridge 31/10/14
	Sofosbuvir		MedChem Express stock
	Radicicol		re Sophie Schuman
	Manually looked at 72 h.p.e #1-#4 electroporations on microscope
	High number of red +ve cells in #1, #3 and #4 but not #2
	High number of red +ve cells but fairly low intensity of red in all relative to infected cells from Exp#001

## Sheet: construct titrations
	Label: JS-48h_titration_061114
	Time Stamp:	2014-11-06 17:00:00	Elapsed:	0	hours
	HS 15.10.14 JS Images Plate 1 Red Count (1/Well)
		1	2	3	4	5	6	7	8	9	10	11	12			2	4	8	16	32	64	128	256	512	1024	2048	4096
	A															1802	474	310.25	142.75	37.25	16.75	0	10	3.25	0	13.25	0
	B	1802	474	310.25	142.75	37.25	16.75	0	10	3.25	0	13.25	0			3474.25	0	0	0	0	6.75	0	0	0	0	3.25	6.75
	C	3474.25	0	0	0	0	6.75	0	0	0	0	3.25	6.75			3658.25	1013.25	474	156.25	160	81.5	23.5	16.75	0	0	3.25	13.25
	D	3658.25	1013.25	474	156.25	160	81.5	23.5	16.75	0	0	3.25	13.25			4381.75	1535.25	729.75	344	194.25	122.25	33.75	44	10	0	3.25	0
	E	4381.75	1535.25	729.75	344	194.25	122.25	33.75	44	10	0	3.25	0
	F	3.25	0	13.5	6.75	0	0	0	13.25	0	0	3.25	0
	Std Error
		1	2	3	4	5	6	7	8	9	10	11	12
	A
	B	228.657	69.264	62.8548	32.7195	21.6694	10.0281	0	6.44205	3.25	0	5.51324	0
	C	1331.68	0	0	0	0	6.75	0	0	0	0	3.25	6.75
	D	1304.83	56.1803	63.0674	26.487	36.6037	28.8343	19.41	12.7892	0	0	3.25	9.42846
	E	732.325	457.647	86.651	50.5585	41.2944	43.5419	11.884	20.2608	10	0	3.25	0
	F	3.25	0	13.5	6.75	0	0	0	5.51324	0	0	3.25	0
		Fold dilution
		2	4	8	16	32	64	128	256	512	1024	2048	4096
JFH1		1802	474	310.25	142.75	37.25	16.75	0	10	3.25	0	13.25	0
JFH1 error		228.657	69.264	62.8548	32.7195	21.6694	10.0281	0	6.44205	3.25	0	5.51324	0
		0.126891	0.146127	0.202594	0.229208	0.581729	0.598692	#DIV/0!	0.644205	1	#DIV/0!	0.416094	#DIV/0!
JFH1 GND		3474.25	0	0	0	0	6.75	0	0	0	0	3.25	6.75
JFH1 GND error		1331.68	0	0	0	0	6.75	0	0	0	0	3.25	6.75
		0.3833	#DIV/0!	#DIV/0!	#DIV/0!	#DIV/0!	1	#DIV/0!	#DIV/0!	#DIV/0!	#DIV/0!	1	1
																Use 4-16 fold dilutions to calculate titre
J4-JFH1 5ug		3658.25	1013.25	474	156.25	160	81.5	23.5	16.75	0	0	3.25	13.25
J4-JFH1 5ug error		1304.83	56.1803	63.0674	26.487	36.6037	28.8343	19.41	12.7892	0	0	3.25	9.42846
		0.356681	0.0554457	0.133054	0.169517	0.228773	0.353795	0.82596	0.763532	#DIV/0!	#DIV/0!	1	0.711582
J4-JFH1 10ug		4381.75	1535.25	729.75	344	194.25	122.25	33.75	44	10	0	3.25	0
J4-JFH1 10ug error		732.325	457.647	86.651	50.5585	41.2944	43.5419	11.884	20.2608	10	0	3.25	0
		0.167131	0.298093	0.118741	0.146973	0.212584	0.356171	0.352118	0.460473	1	#DIV/0!	1	#DIV/0!
			JFH1				J4 JFH1 (5ug)				J4 JFH1 (10ug)
	Dilution factor		4	8	16		4	8	16		4	8	16
	NS5A cells/well		474	310.25	142.75		1013.25	474	156.25		1535.25	729.75	344
	* dilution factor		1896	2482	2284		4053	3792	2500		6141	5838	5504
	* 10 for per ml		18960	24820	22840		40530	37920	25000		61410	58380	55040
	AVG		22206.7				34483.3				58276.7
	Titre		22206.7				34483.3				58276.7

## Sheet: JFH1 Drug plate 48h infection
	DID NOT WORK - JFH1 TITRE TOO LOW AND HENCE 1:4 DILUTION GAVE TOO LOW SIGNAL TO FIT IC50 - DMSO CONTROL RED CELLS/ WELL = 30-100, AROUND 10X LOWER THAN EXP#002
	Label: JS_48hinfection_Drugplate_061114
	Time Stamp:	2014-11-06 18:04:00	Elapsed:	0	hours
	JS J4-JFHvirus Red PD 061114 Count (1/Well)
		1	2	3	4	5	6	7	8	9	10	11	12
	A	30	81.5	71.25	115.5	132.5	94.75	125.5	187.25	228.25	139.5	163	173.75
	B	78	88.25	68	88.25	132.75	95	50.5	126	102	266	88	122.25
	C	57.5	47.25	108.75	81.25	245	115.75	156.5	91.5	190.5	173.75	112	102
	D	30	64.25	74.5	112.25	122.25	129.25	91.5	146.25	108.5	115.5	88.25	84.75
	E	61	71	64.25	115.5	98.25	262.25	129	177	136	88	67.75	47
	F	105.25	53.75	101.75	95	81.25	306.5	177	210.75	54	37	163.25	381.75
	G	665	47.25	54.25	125.5	54.25	187.25	170.25	579.5	60.75	95.25	501.5	508
	H	40.25	64.5	30.25	67.75	538.75	187	85	228.25	159.75	136	241.75	60.75
	Std Error
		1	2	3	4	5	6	7	8	9	10	11	12
	A	10.2225	30.9798	17.0508	59.6133	36.7435	43.1651	39.9698	29.5927	65.4935	29.7559	37.4277	13.0088
	B	6.44205	12.9253	24.2109	44.7965	55.8411	26.1119	3.5	38.7986	14.1716	53.9151	22.8145	31.9801
	C	11.565	6.75	33.9273	24.3049	100.429	47.8929	23.2755	17.1002	61.5772	49.9256	6.44205	17.2192
	D	6.44205	24.5437	27.6722	23.1998	24.3049	70.7088	18.0301	56.9684	7.79423	41.0051	30.3105	17.9507
	E	14.1716	33.9902	12.7892	23.2755	41.0455	86.8863	27.5892	47.7581	23.6714	43.3013	28.303	17.2192
	F	39.1373	9.66415	30.1976	17.6871	11.2278	216.839	43.568	55.862	24.2109	11.7118	48.319	323.288
	G	352.622	19.6018	22.9724	14.0268	19.3278	61.5797	35.98	372.237	35.3633	39.7877	298.125	251.839
	H	11.2278	21.8384	8.57686	9.66415	387.108	60.4235	25.7844	53.7454	66.8785	85.7215	160.135	16.4184

## Sheet: JFH1 Drug plate 72hpe Red cells
	Label: JS_72hpe_Drugplate_061114												µ
	Time Stamp:	2014-11-06 18:04:00	Elapsed:	0	hours
																			RIM
	JS J4-JFHvirus Red PD 061114 Count (1/Well)															uM	log10					ST ERROR			% ERROR				AVG DMSO CONTROL			Normalised to DMSO control
		1	2	3	4	5	6	7	8	9	10	11	12			100	2		334	484		106.471	105.18		0.318777	0.217314			2917.62	2917.62		11.4477	16.5888
	A	2617.25	3218	3184.25	2774.25	3009.5	3460.5	2665	2733.5	2927.75	2119	2211.25	2023.5			56.2	1.74974		1743.5	2416.25		66.0057	130.349		0.0378581	0.0539466			2917.62	2917.62		59.7575	82.8156
	B	3269.25	3436.5	3126	3272.75	3433	3166.75	3719.75	3354.5	3095.25	3497.5	2426.25	2282.75			31.6	1.49969		2474	3057.75		211.523	148.928		0.0854985	0.0487051			2917.62	2917.62		84.795	104.803
	C	2880.25	3184	3378.25	3583.25	3480.75	3736.75	3385.25	3422.75	3556	3323.75	2071.25	2197.5			17.8	1.25042		3125.75	3446.5		372.604	234.798		0.119205	0.0681266			2917.62	2917.62		107.133	118.127
	D	2876.5	3494.25	3620.75	3497.75	3429.75	3730	3501	3535.5	3525	3511.5	2306.75	1484.25			10	1		2876.5	3494.25		162.547	285.201		0.0565087	0.0816201			2917.62	2917.62		98.5905	119.764
	E	3125.75	3446.5	3231.75	3566	3883.5	3696	4276.25	3583	3477.5	3412.5	1371.5	917.5			5.6	0.748188		2880.25	3184		195.644	200.32		0.067926	0.0629146			2917.62	2917.62		98.719	109.13
	F	2474	3057.75	2825.25	2859.75	3665.25	3982.75	3542.25	3651.5	579.75	839.25	330.75	282.75			3.16	0.499687		3269.25	3436.5		195.061	110.645		0.0596655	0.0321971			2917.62	2917.62		112.052	117.784
	G	1743.5	2416.25	2078	2491.25	3402.25	4109	3576.5	3907.5	0	16.75	20.25	37.25			0	0.25		2617.25	3218		103.813	174.514		0.0396651	0.0542306			2917.62	2917.62		89.7048	110.295
	H	334	484	1064.25	671.75	2805.25	2719.5	2040.5	2078.25	0	3.25	0	0
	Std Error																		LDS21
		1	2	3	4	5	6	7	8	9	10	11	12
	A	103.813	174.514	280.676	140.572	89.3574	239.934	210.011	253.069	156.648	113.623	154.035	211.559			31.6	1.49969		1064.25	671.75		251.423	145.008		0.236245	0.215866			2979.25	2979.25		35.7221	22.5476
	B	195.061	110.645	291.576	147.122	154.485	195.172	314.861	274.094	99.7099	353.974	42.6466	139.801			10	1		2078	2491.25		124.548	84.49		0.0599364	0.0339147			2979.25	2979.25		69.7491	83.62
	C	195.644	200.32	151.44	272.713	253.175	229.428	225.312	302.101	223.91	129.701	131.131	138.631			3.16	0.499687		2825.25	2859.75		119.525	385.776		0.042306	0.134898			2979.25	2979.25		94.8309	95.9889
	D	162.547	285.201	262.812	192.702	124.785	269.164	244.047	273.661	119.965	276.131	347.291	173.214			1	0		3231.75	3566		194.267	331.06		0.0601121	0.0928378			2979.25	2979.25		108.475	119.695
	E	372.604	234.798	194.267	331.06	376.103	365.827	460.149	173.456	217.29	158.112	216.618	72.6114			0.316	-0.500313		3620.75	3497.75		262.812	192.702		0.072585	0.0550932			2979.25	2979.25		121.532	117.404
	F	211.523	148.928	119.525	385.776	177.226	339.2	196.961	190.874	143.856	48.8115	81.6307	42.9348			0.1	-1		3378.25	3583.25		151.44	272.713		0.0448281	0.0761078			2979.25	2979.25		113.393	120.274
	G	66.0057	130.349	124.548	84.49	264.519	298.472	326.257	361.385	0	12.7892	12.9253	15.052			0.0316	-1.50031		3126	3272.75		291.576	147.122		0.0932745	0.0449536			2979.25	2979.25		104.926	109.851
	H	106.471	105.18	251.423	145.008	148.925	108.588	200.011	275.839	0	3.25	0	0			0	-2		3184.25	2774.25		280.676	140.572		0.0881452	0.0506702			2979.25	2979.25		106.881	93.1191
																			LDS21.8
																31.6	1.49969		2805.25	2719.5		148.925	108.588		0.053088	0.0399295			3235	3235		86.7156	84.0649
																10	1		3402.25	4109		264.519	298.472		0.0777482	0.0726386			3235	3235		105.17	127.017
																3.16	0.499687		3665.25	3982.75		177.226	339.2		0.048353	0.0851673			3235	3235		113.3	123.114
																1	0		3883.5	3696		376.103	365.827		0.0968464	0.0989791			3235	3235		120.046	114.25
																0.316	-0.500313		3429.75	3730		124.785	269.164		0.036383	0.0721619			3235	3235		106.02	115.301
																0.1	-1		3480.75	3736.75		253.175	229.428		0.0727358	0.0613978			3235	3235		107.597	115.51
																0.0316	-1.50031		3433	3166.75		154.485	195.172		0.0449999	0.0616316			3235	3235		106.121	97.8903
																0	-2		3009.5	3460.5		89.3574	239.934		0.0296918	0.069335			3235	3235		93.0294	106.971
																			LDS21.9
																31.6	1.49969		2040.5	2078.25		200.011	275.839		0.0980204	0.132726			3213.46	3213.46		63.4986	64.6733
																10	1		3576.5	3907.5		326.257	361.385		0.0912225	0.0924849			3213.46	3213.46		111.298	121.598
																3.16	0.499687		3542.25	3651.5		196.961	190.874		0.0556034	0.0522727			3213.46	3213.46		110.232	113.631
																1	0		4276.25	3583		460.149	173.456		0.107606	0.0484107			3213.46	3213.46		133.073	111.5
																0.316	-0.500313		3501	3535.5		244.047	273.661		0.0697078	0.0774038			3213.46	3213.46		108.948	110.022
																0.1	-1		3385.25	3422.75		225.312	302.101		0.0665571	0.0882627			3213.46	3213.46		105.346	106.513
																0.0316	-1.50031		3719.75	3354.5		314.861	274.094		0.0846457	0.0817093			3213.46	3213.46		115.755	104.389
																0	-2		2665	2733.5		210.011	253.069		0.0788033	0.0925805			3213.46	3213.46		82.9325	85.0641
																			SOF
																nM
																100000	5		0	3.25		0	3.25		#DIV/0!	1			3194.47	3194.47		0	0.101738
																10000	4		0	16.75		0	12.7892		#DIV/0!	0.763532			3194.47	3194.47		0	0.524344
																1000	3		579.75	839.25		143.856	48.8115		0.248134	0.0581609			3194.47	3194.47		18.1486	26.272
																100	2		3477.5	3412.5		217.29	158.112		0.0624844	0.0463332			3194.47	3194.47		108.86	106.825
																10	1		3525	3511.5		119.965	276.131		0.0340325	0.0786361			3194.47	3194.47		110.347	109.924
																1	0		3556	3323.75		223.91	129.701		0.0629669	0.0390223			3194.47	3194.47		111.317	104.047
																0.1	-1		3095.25	3497.5		99.7099	353.974		0.0322138	0.101208			3194.47	3194.47		96.894	109.486
																0	-2		2927.75	2119		156.648	113.623		0.0535045	0.053621			3194.47	3194.47		91.6506	66.3334
																			RADICICOL
																uM
																31.6	1.49969		0	0		0	0		#DIV/0!	#DIV/0!			2117.38	2117.38		0	0
																10	1		20.25	37.25		12.9253	15.052		0.638285	0.40408			2117.38	2117.38		0.956373	1.75925
																3.16	0.499687		330.75	282.75		81.6307	42.9348		0.246805	0.151847			2117.38	2117.38		15.6208	13.3538
																1	0		1371.5	917.5		216.618	72.6114		0.157942	0.0791405			2117.38	2117.38		64.7736	43.332
																0.316	-0.500313		2306.75	1484.25		347.291	173.214		0.150554	0.116702			2117.38	2117.38		108.944	70.0986
																0.1	-1		2071.25	2197.5		131.131	138.631		0.0633099	0.0630856			2117.38	2117.38		97.8216	103.784
																0.0316	-1.50031		2426.25	2282.75		42.6466	139.801		0.0175771	0.0612425			2117.38	2117.38		114.588	107.81
																0	-2		2211.25	2023.5		154.035	211.559		0.0696599	0.104551			2117.38	2117.38		104.434	95.5664

## Sheet: 72hpe % confluency
	Label: JS_72hpe_Drugplate_061114													µ
	Time Stamp:	2014-11-06 18:04:00	Elapsed:	0	hours
	JS_J4-JFHvirus PD 061114 Confluence (Percent)
		1	2	3	4	5	6	7	8	9	10	11	12					RIM
	A	92.4838	98.2796	97.7374	98.4839	96.6073	97.8066	96.9348	96.2303	97.6188	94.0152	93.2498	84.9615		uM	log10
	B	97.5451	99.1791	99.5973	99.2947	99.3672	99.3035	99.5891	99.0901	98.2502	98.7428	96.7753	89.9424		100	2		33.6842	41.681		8.92108	8.09381
	C	98.494	99.4548	99.0753	99.4964	99.5962	99.2863	98.8192	99.2095	99.0614	98.1125	97.018	93.8133		56.2	1.74974		84.2859	94.7309		3.25436	2.38894
	D	96.3393	99.5419	99.6261	99.0594	99.2838	99.576	98.7965	99.0085	99.3102	98.7486	93.7693	79.5473		31.6	1.49969		93.1654	97.0629		2.08638	1.80302
	E	93.2888	99.207	99.2146	98.7601	98.9314	99.1549	99.1039	98.7095	99.0226	99.7182	72.3869	50.0041		17.8	1.25042		93.2888	99.207		2.2167	0.439356
	F	93.1654	97.0629	97.6855	98.665	98.2875	95.2124	99.2244	98.4718	99.6722	98.7702	29.8989	21.1308		10	1		96.3393	99.5419		0.832884	0.296241
	G	84.2859	94.7309	96.2325	96.5782	98.2328	98.2422	98.0784	95.9647	99.1413	97.6898	12.4279	9.7165		5.6	0.748188		98.494	99.4548		0.517689	0.110581
	H	33.6842	41.681	67.9277	52.992	87.6331	91.1864	86.2247	81.9693	91.6392	89.5841	0.273835	0.0128481		3.16	0.499687		97.5451	99.1791		0.635526	0.247524
															0	0.25		92.4838	98.2796		1.59492	0.244811
	Std Error
		1	2	3	4	5	6	7	8	9	10	11	12
	A	1.59492	0.244811	0.615876	0.166427	0.420411	0.398557	0.520915	0.869954	0.233788	1.4613	1.24619	3.00165					LDS21
	B	0.635526	0.247524	0.0517314	0.167501	0.160836	0.131527	0.188325	0.101628	0.283182	0.130695	0.71388	1.74662
	C	0.517689	0.110581	0.34057	0.115445	0.0999684	0.0852749	0.435147	0.320906	0.199213	0.531914	0.49606	0.729029		31.6	1.49969		67.9277	52.992		13.1145	9.49029
	D	0.832884	0.296241	0.0698278	0.250997	0.280583	0.137953	0.467807	0.185869	0.187091	0.416266	0.348853	3.23746		10	1		96.2325	96.5782		1.02265	1.48611
	E	2.2167	0.439356	0.316878	0.455046	0.353369	0.197548	0.514425	0.286685	0.20914	0.044319	5.19717	3.06506		3.16	0.499687		97.6855	98.665		1.59915	0.567728
	F	2.08638	1.80302	1.59915	0.567728	0.919059	2.20034	0.479242	0.623996	0.0627584	0.532215	4.99681	4.47334		1	0		99.2146	98.7601		0.316878	0.455046
	G	3.25436	2.38894	1.02265	1.48611	0.923628	0.709227	0.420723	2.18499	0.200132	0.941364	1.41493	1.70807		0.316	-0.500313		99.6261	99.0594		0.0698278	0.250997
	H	8.92108	8.09381	13.1145	9.49029	1.63287	3.52245	4.15024	7.67585	2.34616	1.91638	0.0396031	0.00496924		0.1	-1		99.0753	99.4964		0.34057	0.115445
															0.0316	-1.50031		99.5973	99.2947		0.0517314	0.167501
															0	-2		97.7374	98.4839		0.615876	0.166427
																		LDS21.8
															31.6	1.49969		87.6331	91.1864		1.63287	3.52245
															10	1		98.2328	98.2422		0.923628	0.709227
															3.16	0.499687		98.2875	95.2124		0.919059	2.20034
															1	0		98.9314	99.1549		0.353369	0.197548
															0.316	-0.500313		99.2838	99.576		0.280583	0.137953
															0.1	-1		99.5962	99.2863		0.0999684	0.0852749
															0.0316	-1.50031		99.3672	99.3035		0.160836	0.131527
															0	-2		96.6073	97.8066		0.420411	0.398557
																		LDS21.9
															31.6	1.49969		86.2247	81.9693		4.15024	7.67585
															10	1		98.0784	95.9647		0.420723	2.18499
															3.16	0.499687		99.2244	98.4718		0.479242	0.623996
															1	0		99.1039	98.7095		0.514425	0.286685
															0.316	-0.500313		98.7965	99.0085		0.467807	0.185869
															0.1	-1		98.8192	99.2095		0.435147	0.320906
															0.0316	-1.50031		99.5891	99.0901		0.188325	0.101628
															0	-2		96.9348	96.2303		0.520915	0.869954
																		SOF
															nM
															100000	5		91.6392	89.5841		2.34616	1.91638
															10000	4		99.1413	97.6898		0.200132	0.941364
															1000	3		99.6722	98.7702		0.0627584	0.532215
															100	2		99.0226	99.7182		0.20914	0.044319
															10	1		99.3102	98.7486		0.187091	0.416266
															1	0		99.0614	98.1125		0.199213	0.531914
															0.1	-1		98.2502	98.7428		0.283182	0.130695
															0	-2		97.6188	94.0152		0.233788	1.4613
																		Radicicol
															uM
															31.6	1.49969		0.273835	0.0128481		0.0396031	0.00496924
															10	1		12.4279	9.7165		1.41493	1.70807
															3.16	0.499687		29.8989	21.1308		4.99681	4.47334
															1	0		72.3869	50.0041		5.19717	3.06506
															0.316	-0.500313		93.7693	79.5473		0.348853	3.23746
															0.1	-1		97.018	93.8133		0.49606	0.729029
															0.0316	-1.50031		96.7753	89.9424		0.71388	1.74662
															0	-2		93.2498	84.9615		1.24619	3.00165
