# Supplementary material for: Rationally derived inhibitors of hepatitis C virus (HCV) p7 channel activity reveal prospect for bimodal antiviral therapy
Source: eLife journal article supplement (doi:10.7554/elife.52555), 2020-11-10
Supplement: fig1-figsupp1-data1 [file Exp 005.xlsx]

## Sheet: Experimental Procedure
	Exp #005 -
Aim(s)	Determine IC50 for LDS21, LDS21.8 and LDS21.9 vs J4-JFH1
	Improve titre and signal to noise from electroporations and supernatant dilutions
	Increase DCV/SOF curves to n=2/3
Day 1	Friday	Electroporate 5 µg (or 10 µg) RNA into cells (5 µl @ 1 µg/µl)
	2014-11-14
					RNA stock						Resuspend in (ml media)			Cell density/ml		cells/well
		#1	JFH1		Fresh re HS		5 µg				16			250000		25000
		#2	J4-JFH1		#1 28/10/2014		10 µg
		Single well seeded for both												Plate layout
			Transfer 96 well plate to CatIII within 4h
			Incubate 72h
																#1		#2
		Seeed 1x plate lanes 2-11 JFH1
		Seed 1x plate J4-JFH1
		Seed 7x lanes J4-JFH1
Day 4	Monday	Seed cells for infection (Huh7)					Dilute to cells/ml			cells/well (100 µl seeded)
	2014-11-17	Incubate 6h					80000			8000				J4-JFH1 Drug plate 1
														Inhibitor	Concentration (0.25 % DMSO)
		Need 3 x plates
															100	56.2	31.6	17.8	10	5.6	3.16	0	µM	RIM
		Move supernatant (unclarified) onto 2-fold dilution wells													100	56.2	31.6	17.8	10	5.6	3.16	0	µM	RIM
		Perform 2-fold diluton series													40000	4000	400	40	4	0.4	0.04	0	nM	LDS21
															40000	4000	400	40	4	0.4	0.04	0	nM	LDS21
		Perform dilutions (50 in 50 and 50 in 150)													40000	4000	400	40	4	0.4	0.04	0	nM	LDS21.8
		Incubate 48h													40000	4000	400	40	4	0.4	0.04	0	nM	LDS21.8
															40000	4000	400	40	4	0.4	0.04	0	nM	LDS21.9
		Remove remaining media -> waste, wash 2x PBS and fix in PFA													40000	4000	400	40	4	0.4	0.04	0	nM	LDS21.9
		Remove from CatIII, wash in PBS -> LIMM													100000	10000	1000	100	10	1	0.1	0	nM	SOF
		Stain, image and analyse													100000	10000	1000	100	10	1	0.1	0	nM	SOF
															100000	10000	1000	100	10	1	0.1	0	pM	DCV
														J4-JFH1 Drug plate 1
Day 6	Wednesday	Wash cells 2x (< 100 µl PBS)				7x plates to go into PFA								Inhibitor	Concentration (0.25 % DMSO)
	2014-11-19	Fix in 100 µl 3-4% PFA				req 70 ml PFA
		TAKE OUT OF CATIII													100	56.2	31.6	17.8	10	5.6	3.16	0	µM	RIM
		Wash 3-4x PBS													100	56.2	31.6	17.8	10	5.6	3.16	0	µM	RIM
		Primary Ab o/n													40000	4000	400	40	4	0.4	0.04	0	nM	LDS21.8
		Secondary Ab 4h													40000	4000	400	40	4	0.4	0.04	0	nM	LDS21.8
															40000	4000	400	40	4	0.4	0.04	0	nM	LDS21.9
															40000	4000	400	40	4	0.4	0.04	0	nM	LDS21.9
															100000	10000	1000	100	10	1	0.1	0	pM	DCV
														JFH1 Drug plate
														Inhibitor	Concentration (0.25 % DMSO)
															100000	10000	1000	100	10	1	0.1	0	nM	SOF
															100000	10000	1000	100	10	1	0.1	0	nM	SOF
															100000	10000	1000	100	10	1	0.1	0	pM	DCV
															100000	10000	1000	100	10	1	0.1	0	pM	DCV
															100000	10000	1000	100	10	1	0.1	0	nM	SOF
															100000	10000	1000	100	10	1	0.1	0	nM	SOF
															100000	10000	1000	100	10	1	0.1	0	pM	DCV
															100000	10000	1000	100	10	1	0.1	0	pM	DCV

## Sheet: Experimental details
2014-11-14
	Huh7	Pooled 2x T175 -> 20 ml.
		28	36		56.5 x 10^4 / ml
		21	28
		Resuspend in 1.1 ml DEPC-PBS to 1 x 10^7 cells/ ml						OLD DEPC MAY HAVE CONTAMINANATS - USED FRESH DEPC-PBS re DRT
		USED SUQRE WAVE ELECTROPORATION PROTOCOL - -> user protocols 5, Diane #1.
		#1	JFH1 (re HS) -> Huh7		TC 31.8	267 V	5 µg	10 µl		15 % Droop	256V	25ms
		#2	J4-JFH1 #1 -> Huh7		TC 30.7	266 V	10 µg	10 µl		15% Droop	256V	25ms
2014-11-17
	Huh7	1x T175
		31	35		65.5 x 10^4 / ml
		29	36
		7.3 ml cells in 52.7 ml media.
		NOTE - More orange-yellow colour in wells that contain virus - a few wells contain less virus and media still appears red.
		NOTE - Dose responsive colour change orange-yellow -> yellow wih SOF and DCV in JFH1 plate - indicates dose responsive loss of virus - colur change may be due to more cells in wells without virus in?
		NOTE - No dose responsive colour changes observed in J4-JFH1 plates - even for DCV and SOF
		NOTE - Slight J4-JFH1 colour change with RIM but none with LDS21, 21.8 or 21.9

## Sheet: 72hpe confluency data
	Havn't read yet - in PBS in fridge

## Sheet: 48h infection data
	JS-Exp005-PD-201114 processing definition. RCU cut-off increased to 3.0
	No additional improvement with increase of RCU to 4.0 (JS-Exp005-PDv2-201114)
	Barcode: 2014y11m20d15h20
	Metric: JS-Exp005-PD-Red Count (1/Well)
	Cell Type: Huh7
	Passage: 1
	Notes: JFH1 50 in 150 drug plate
	48h infection data
	201114
	Analysis Job: JS-Exp005-JFH1-Drugplate-Exp5PD-analysis-201114
	Time Stamp:	2014-11-20 15:32:00	Elapsed:	0	hours
	JS-Exp005-PD-Red Count (1/Well)													SOF	#1			SOF	#2		nM	log10
		1	2	3	4	5	6	7	8	9
	A		4480.75	3044	2542.25	2153.25	3129.5	3044	2689	3269.25				9.75	20			16.5	20		100000	5		DMSO control higher NS5A +ve cells/ well signal
	B		3245.25	2559.25	2398.75	2327.25	2071	2221.5	3231.5	3371.75				3.25	0			37.25	10		10000	4		Not observed in DCV curves
	C		2440	2112.25	1648	1351.25	1784.5	1801.75	1549	2153.25				57.5	37.25			26.75	67.75		1000	3		Not sure why this is???
	D		2617.25	1757.25	712.5	566	1644.5	2105.5	692.25	1525.25				1450	764			791.25	778		100	2
	E		1450	764	3.25	26.75	791.25	778	37	27				2617.25	1757.25			1644.5	2105.5		10	1
	F		57.5	37.25	10	13.5	26.75	67.75	26.75	23.5				2440	2112.25			1784.5	1801.75		1	0
	G		3.25	0	13.5	20.25	37.25	10	0	33.5				3245.25	2559.25			2071	2221.5		0.1	-1
	H		9.75	20	37	30.25	16.5	20	64.25	57.5				4480.75	3044			3129.5	3044		0	-2
	Std Error													IC50 = 62.2 nM				IC50 = 73.4 nM
		1	2	3	4	5	6	7	8	9
	A		135.118	351.328	339.634	680.188	451.517	567.026	419.083	277.812
	B		235.155	415.763	171.112	475.483	181.279	447.314	330.755	151.27
	C		255.115	326.085	332.452	120.379	274.791	313.205	183.878	478.52
	D		127.291	289.608	50.2685	48.1266	345.159	120.484	92.7958	91.9822
	E		144.168	109.583	3.25	9.66415	79.1785	115.243	19.6129	14.7366				DCV	#1			DCV	#2
	F		19.6998	33.059	6.44205	7.79423	9.42846	34.2062	5.51324	3.5											pM	log10
	G		3.25	0	7.79423	16.2089	23.0773	10	0	8.77971
	H		3.25	4.04145	21.0515	15.0907	8.4113	11.547	15.2773	23.8345				37	30.25			64.25	57.5		100000	5
														13.5	20.25			0	33.5		10000	4
	% Error		0.0301551	0.115417	0.133596	0.315889	0.144278	0.186277	0.155851	0.0849773				10	13.5			26.75	23.5		1000	3
			0.0724614	0.162455	0.0713337	0.204311	0.087532	0.201357	0.102353	0.0448639				3.25	26.75			37	27		100	2
			0.104555	0.154378	0.201731	0.0890875	0.153988	0.173834	0.118707	0.222231				712.5	566			692.25	1525.25		10	1
			0.0486352	0.164807	0.0705522	0.0850293	0.209887	0.0572235	0.13405	0.0603063				1648	1351.25			1549	2153.25		1	0
			0.0994264	0.143434	1	0.361277	0.100068	0.148128	0.530079	0.545799				2398.75	2327.25			3231.5	3371.75		0.1	-1
			0.342606	0.887489	0.644205	0.57735	0.352466	0.504888	0.206103	0.148936				2542.25	2153.25			2689	3269.25		0	-2
			1	#DIV/0!	0.57735	0.80044	0.619525	1	#DIV/0!	0.262081
			0.333333	0.202073	0.56896	0.498866	0.509776	0.57735	0.237779	0.414513				IC50 = 2.1 pM				IC50 = 2.5 pM
	Old processing definition (RCU 2.5) higher background
	Barcode: 2014y11m20d15h20
	Metric: JS-JFH1-96well-231014-Red Count (1/Well)
	Cell Type: Huh7
	Passage: 1
	Notes: JFH1 50 in 150 drug plate
	48h infection data
	201114
	Analysis Job: JS-Exp005-JFH-1in4-Drugplate-48h-analysis-201114
	Time Stamp:	2014-11-20 15:32:00	Elapsed:	0	hours
	JS-JFH1-96well-231014-Red Count (1/Well)
		1	2	3	4	5	6	7	8	9			SOF	#1		SOF	#2		nM	log10
	A		6658.25	4316.75	3525	2853	4071.5	4105.5	3218	3934.75
	B		4327.25	3330.75	2999.25	2870	2552.75	2648	3941.75	3924.75			173.5	429.5		433	910.75		100000	5
	C		3037	2730	2030.5	1658.25	2262.25	2197.5	1849.5	2607			1023.25	40.25		310	743.5		10000	4
	D		3327.25	2044	897.25	740	2088.25	2368	822	1822			1279.25	105.25		323.75	173.75		1000	3
	E		1750.25	938	23.5	78	945	914.25	112.25	119			1750.25	938		945	914.25		100	2
	F		1279.25	105.25	842.5	71	323.75	173.75	723.25	190.75			3327.25	2044		2088.25	2368		10	1
	G		1023.25	40.25	818.75	275.75	310	743.5	1692.25	310			3037	2730		2262.25	2197.5		1	0
	H		173.5	429.5	317	296.5	433	910.75	436.5	610.25			4327.25	3330.75		2552.75	2648		0.1	-1
													6658.25	4316.75		4071.5	4105.5		0	-2			Higher DMSO - additional Ab in these wells?
	Std Error
		1	2	3	4	5	6	7	8	9			61.55 nM			44.45 nM
	A		466.067	674.233	526.884	870.341	668.957	873.387	570.428	361.43
	B		472.038	558.936	217.679	615.709	274.474	567.849	325.826	184.182
	C		339.703	354.497	389.6	164.229	325.464	317.154	213.225	579.251			DCV	#1		DCV	#2		pM
	D		170.025	347.368	40.4256	74.4009	453.623	154.816	70.4971	151.367
	E		186.274	123.424	8.4113	33.608	103.342	133.681	46.2302	20.2608			317	296.5		436.5	610.25		100000	5
	F		694.428	53.3266	593.626	24.5323	142.769	35.8199	334.021	47.5191			818.75	275.75		1692.25	310		10000	4
	G		672.868	5.51324	392.392	152.933	132.144	524.475	964.427	96.1639			842.5	71		723.25	190.75		1000	3
	H		83.4281	125.815	134.62	123.466	229.943	510.044	246.358	205.045			23.5	78		112.25	119		100	2
													897.25	740		822	1822		10	1
													2030.5	1658.25		1849.5	2607		1	0
		% Error	0.0699984	0.15619	0.149471	0.305062	0.164302	0.212736	0.177262	0.0918559			2999.25	2870		3941.75	3924.75		0.1	-1
			0.109085	0.167811	0.0725779	0.214533	0.107521	0.214444	0.0826603	0.0469284			3525	2853		3218	3934.75		0	-2
			0.111855	0.129852	0.191874	0.0990377	0.143868	0.144325	0.115288	0.222191
			0.0511007	0.169945	0.045055	0.100542	0.217226	0.0653784	0.0857628	0.0830771
			0.106427	0.131582	0.357928	0.430872	0.109356	0.14622	0.41185	0.170259			1.136 pM			1.353 pM
			0.54284	0.506666	0.7046	0.345525	0.440986	0.206157	0.461834	0.249117
			0.657579	0.136975	0.479257	0.554608	0.426271	0.705413	0.569908	0.310206
			0.480854	0.292934	0.424668	0.41641	0.531046	0.560027	0.564394	0.336002
		J4-JFH1 1:4 drug plates some red cells but signal even lower than Exp#004 and cannot fit any IC50 curves - even DCV
		J4-JFH1 electroporation didn't work well enough to dilute infectious virus for IC50 curves
		Most likely due to freeze-thawing of RNA?

## Sheet: 48h infection titration
	Barcode: 2014y11m20d15h5					JS-Exp005-PD-201114 processing definition. RCU cut-off increased to 3.0
	Metric: JS-Exp005-PD-Red Count (1/Well)					No additional improvement with increase of RCU to 4.0 (JS-Exp005-PDv2-201114)
	Cell Type: Huh7																								2
	Passage: 1																								4
	Notes: 2-fold titration																								8
	JFH1 (B)																								16
	J4-JFH1 (C)																								32
																									64
	48h infection data																								128
	Analysis Job: JS-Exp005-titration-Exp5PD-analysis-201114																								256
																									512
	Time Stamp:	2014-11-20 15:14:00	Elapsed:	0	hours																				1024
																									2048
	JS-Exp005-PD-Red Count (1/Well)																								4096
		1	2	3	4	5	6	7	8	9	10	11	12
	A
	B	4726.5	3702.75	2637.75	1743.75	825.5	406	279.25	194	74.5	37	6.75	0
	C	156.75	81.25	37.25	13.5	6.75	13.25	0	6.5	0	3.25	0	0
	Std Error
		1	2	3	4	5	6	7	8	9	10	11	12
	A
	B	486.498	251.232	166.91	71.7953	31.7241	88.5814	51.8513	57.3948	27.6722	15.0333	6.75	0
	C	29.7668	43.4633	15.052	13.5	6.75	9.42846	0	3.75278	0	3.25	0	0
	% Error	0.10293	0.0678501	0.0632775	0.0411729	0.0384301	0.218181	0.185681	0.29585	0.371439	0.406305	1	#DIV/0!
		0.1899	0.534934	0.40408	1	1	0.711582	#DIV/0!	0.57735	#DIV/0!	1	#DIV/0!	#DIV/0!
	Old processing definition - RCU cut-off 2.5
	Barcode: 2014y11m20d15h5
	Metric: JS-JFH1-96well-231014-Red Count (1/Well)
	Cell Type: Huh7
	Passage: 1
	Notes: 2-fold titration
	JFH1 (B)
	J4-JFH1 (C)
	48h infection data
	Analysis Job: JS-Exp005-titration-analysis-201114
	Time Stamp:	2014-11-20 15:14:00	Elapsed:	0	hours
	JS-JFH1-96well-231014-Red Count (1/Well)
		1	2	3	4	5	6	7	8	9	10	11	12
	A
	B	7863.25	5750.5	4371.75	2842.5	1580	668.5	388.75	347.5	102	74.5	2678.75	170		JFH1
	C	443	98.25	320.5	1272.5	197.5	221.25	221.5	1238.5	0	3852.75	1716.25	2562.75		J4-JFH1
	Std Error
		1	2	3	4	5	6	7	8	9	10	11	12
	A
	B	1081.9	545.691	396.948	127.516	32.1533	144.766	71.4194	63.5407	32.876	21.2818	1283.3	103.378		JFH1
	C	90.6486	51.8063	106.994	598.941	46.3995	71.0403	134.257	309.436	0	893.502	1088.65	1305.19		J4-JFH1
	% Error	0.13759	0.0948945	0.0907983	0.0448606	0.0203502	0.216553	0.183715	0.182851	0.322314	0.285662	0.479067	0.608105		JFH1
		0.204624	0.527291	0.333835	0.470681	0.234934	0.321086	0.606126	0.249847	#DIV/0!	0.231913	0.634322	0.509295		J4-JFH1
																	Plate had high background in some wells e.g. B11 - above 2.5 RCU cut-off
	HepaRG titration
	Barcode: 2014y11m13d17h3
	Metric: JS-JFH1-96well-231014-Red Count (1/Well)
	Cell Type: HepaRG
	Passage: 2								No infection of HepaRG cells depsite high infectious titre in Huh7 cells.
	Notes:
	Analysis Job: JS-HepaRGtitration-analysis
	Time Stamp:	2014-11-20 14:57:00	Elapsed:	0	hours
	JS-JFH1-96well-231014-Red Count (1/Well)
		1	2	3	4	5
	A	1579.75	132.5	50.75	9.75	13.25		JFH1		decreasing cell no. seeded A -> H
	B	1282.5	78	40.25	33.5	6.5		J4-JFH1
	C	992.75	132.5	64	40.5	26.75		JFH1
	D	825.75	187.25	37.25	50.75	60.75		J4-JFH1
	E	201.25	6.5	16.5	26.75	40.75		JFH1
	F	815.25	0	6.5	3.25	20		J4-JFH1
	G	146.5	16.5	13.25	16.5	0		JFH1
	H	501.5	0	16.5	23.5	0		J4-JFH1
	Std Error
		1	2	3	4	5
	A	632.479	50.2685	17.7922	3.25	5.51324		JFH1
	B	405.447	19.6129	14.6593	8.77971	3.75278		J4-JFH1
	C	590.914	36.7435	17	19.9854	5.51324		JFH1
	D	825.75	65.1503	21.6694	13.9665	16.4184		J4-JFH1
	E	155.327	3.75278	8.4113	12.3246	23.6233		JFH1
	F	432.951	0	3.75278	3.25	11.7402		J4-JFH1
	G	109.67	8.4113	9.42846	3.5	0		JFH1
	H	235.677	0	8.4113	19.41	0		J4-JFH1
