# Supplementary material for: Rationally derived inhibitors of hepatitis C virus (HCV) p7 channel activity reveal prospect for bimodal antiviral therapy
Source: eLife journal article supplement (doi:10.7554/elife.52555), 2020-11-10
Supplement: fig1-figsupp1-data1 [file Experiment 2 data anlysis 231014.xlsx]

## Sheet: Titration plate
Barcode: JS-Exp002-titration
Metric: JS-JFH1-96well-231014-Red Count (1/Well)
Cell Type:
Passage: 1
Notes: Exp#002 Titration plate #1-#5 2-fold dilutions
Analysis Job: JS-Exp002-titrationplate-231014
Time Stamp:	2014-10-23 16:50:00	Elapsed:	0	hours
JS-JFH1-96well-231014-Red Count (1/Well)
	1	2	3	4	5	6	7	8	9	10	11	12
A														Electroporation			2-fold dilution series from left to right
B
C	2835.75	118.75	368	119	341	446.75	590.25	880	1125.75	1255.5	1504.5	1641.25		#5	JFH1 GND	Huh7.5
D	3112	845.75	532	378	364.75	245.25	392	801.75	1122.5	1300	1327.5	1344.25		#4	JFH1	Huh7.5
E	1081.25	101.75	180.5	214.5	132.75	225	440	733.5	1003.25	1040.75	1020	1426.25		#3	J4-JFH1	Huh7.5
F	9419.5	7893.75	4494.5	2767.5	1416	893.75	531.75	685.75	634.25	699.5	1115.75	1330.5		#2	JFH1	Huh7
G	9498	163.25	228.25	78	228.25	218.25	276.25	600.25	402.25	593.5	689	699.25		#1	J4-JFH1	Huh7
Std Error
	1	2	3	4	5	6	7	8	9	10	11	12
A
B
C	1161.61	48.1843	56.9927	20.2608	47.6148	105.304	150.797	207.468	72.3963	134.435	114.188	177.271		Standard error from above between 4x images of each well
D	989.235	86.6683	58.2051	14.148	22.5365	55.9574	109.044	218.557	196.471	144.452	265.516	191.407
E	605.177	30.3105	17.1002	11.565	49.4981	22.8145	91.2752	214.281	183.734	123.426	319.276	227.123
F	2989.27	572.069	533.376	181.307	60.6932	60.0921	16.6702	98.6842	103.427	177.686	308.831	390.304
G	1341.96	26.0684	60.221	15.0333	41.4274	37.3974	106.144	132.145	145.741	186.605	237.702	189.455
Fold dilution		2	4	8	16	32	64	128	256	512	1024	2048	4096
NS5A +ve cells/ well		9419.5	7893.75	4494.5	2767.5	1416	893.75	531.75	685.75	634.25	699.5	1115.75	1330.5
SE Error		2989.27	572.069	533.376	181.307	60.6932	60.0921	16.6702	98.6842	103.427	177.686	308.831	390.304
% SE Error		0.317349	0.0724712	0.118673	0.065513	0.0428624	0.0672359	0.0313497	0.143907	0.16307	0.254019	0.276792	0.293351
Red cells/ well
* dilution factor		18839	31575	35956	44280	45312	57200	68064	175552	324736	716288	2285056	5449728
Red cells/ml		188390	315750	359560	442800	453120	572000	680640	1755520	3247360	7162880	22850560	54497280
Titre		188390	315750	359560	442800	453120	572000	680640	1755520	3247360	7162880	22850560	54497280
Log10 Titre		5.27506	5.49934	5.55577	5.64621	5.65621	5.7574	5.83292	6.24441	6.51153	6.85509	7.3589	7.73637

## Sheet: JFH 1in4 drug plate
Barcode: JS-Exp002-JFH-1in4-2
Metric: JS-JFH1-96well-231014-Red Count (1/Well)
Cell Type: Huh7
Passage: 1														1 - untreated
Notes: Exp#002 JFH1 1 in 4 drug plate 231014														2 + 3 - SOF
Analysis Job: JS-Exp002-JFH-1in4-drugplate-231014														4 + 5 DCV
														6 + 7 Rim
Time Stamp:	2014-10-23 16:24:00	Elapsed:	0	hours										8 + 9 LDS21
														G11 - LDS21.8
JS-JFH1-96well-231014-Red Count (1/Well)														E11 - LDS21.9
	1	2	3	4	5	6	7	8	9	10	11	12
A	4289.5	3242.25	3856.25	2941.5	3057.25	3426.25	2620.75	3552.75	3617.25	0	23.25	0		DMSO control
B	4160.25	3395.25	3207.75	3235.25	3190.5	2846	2846	2986	3064.5	3.25	16.75	3.25		lowest conc.
C	4252	3644.5	3433	2620.75	2849.5	2689.25	2467	3279.5	2802	0	13.25	0
D	3842.5	3340.75	3125.75	2166.75	1764.25	1975.75	914.25	2870	3491	3.25	19.75	0
E	4122.25	3166.75	2771	16.75	47.25	1678.75	1351.25	2784.5	3033.75	0	3419.5	0
F	4132.75	2081.75	2180.5	3.25	23.75	958.5	815.25	2190.75	2334	0	30.5	0
G	4136	108.75	122.25	30.5	23.5	805	542	1340.75	1474	0	3371.75	0
H	2914	27	30.5	57.5	71.25	466.75	876.5	221.25	265.75	0	77.75	0		highest conc.
Std Error
	1	2	3	4	5	6	7	8	9	10	11	12		Standard error from above plate between 4x images per well
A	301.082	168.89	210.509	195.825	194.677	218.446	139.711	98.1634	165.592	0	6.48556	0
B	406.906	194.282	351.02	185.901	193.539	90.3336	138.012	221.879	103.737	3.25	10.0281	3.25
C	276.856	274.436	300.834	195.954	254.403	201.079	92.1728	84.1036	149.072	0	5.51324	0
D	199.069	79.2164	194.675	175.791	54.9293	166.549	180.352	104.696	106.29	3.25	6.75	0
E	415.428	233.897	140.172	6.48556	20.5279	61.6392	174.066	71.0464	115.205	0	144.775	0
F	283.768	182.675	126.218	3.25	23.75	105.704	34.0988	125.384	218.084	0	30.5	0
G	337.623	19.3278	31.0896	22.4221	19.41	89.0066	93.38	32.6659	216.94	0	293.737	0
H	475.8	11.0227	26.3455	18.0301	37.9108	87.576	95.1818	45.6022	48.0908	0	25.6852	0
SOF		3242.25	3395.25	3644.5	3340.75	3166.75	2081.75	108.75	27		DCV		2941.5	3235.25	2620.75	2166.75	16.75	3.25	30.5	57.5
		3856.25	3207.75	3433	3125.75	2771	2180.5	122.25	30.5				3057.25	3190.5	2849.5	1764.25	47.25	23.75	23.5	71.25
SOF ST ERR		168.89	194.282	274.436	79.2164	233.897	182.675	19.3278	11.0227		DCV ST ERROR		195.825	185.901	195.954	175.791	6.48556	3.25	22.4221	18.0301
		210.509	351.02	300.834	194.675	140.172	126.218	31.0896	26.3455				194.677	193.539	254.403	54.9293	20.5279	23.75	19.41	37.9108
RIM		3426.25	2846	2689.25	1975.75	1678.75	958.5	805	466.75		LDS21		3552.75	2986	3279.5	2870	2784.5	2190.75	1340.75	221.25
		2620.75	2846	2467	914.25	1351.25	815.25	542	876.5				3617.25	3064.5	2802	3491	3033.75	2334	1474	265.75
RIM ST ERROR		218.446	90.3336	201.079	166.549	61.6392	105.704	89.0066	87.576		LDS21 ST ERROR		98.1634	221.879	84.1036	104.696	71.0464	125.384	32.6659	45.6022
		139.711	138.012	92.1728	180.352	174.066	34.0988	93.38	95.1818				165.592	103.737	149.072	106.29	115.205	218.084	216.94	48.0908
	Sofosbuvir (1:4)
		NS5A/WELL			CONC (nM)	LOG CONC		ST ERROR		% ERROR
		27	30.5		10000	4		11.0227	26.3455	0.408248	0.863786
		108.75	122.25		1000	3		19.3278	31.0896	0.177727	0.254312
		2081.75	2180.5		100	2		182.675	126.218	0.0877508	0.0578848
		3166.75	2771		10	1		233.897	140.172	0.0738602	0.0505853
		3340.75	3125.75		1	0		79.2164	194.675	0.0237121	0.0622812
		3644.5	3433		0.1	-1		274.436	300.834	0.0753013	0.0876301
		3395.25	3207.75		0.01	-2		194.282	351.02	0.0572216	0.109429
		3242.25	3856.25		0	-3		168.89	210.509	0.0520904	0.0545891
	Daclatasvir (1:4)
		NS5A/WELL			CONC (pM)	LOG CONC		ST ERROR		% ERROR
		57.5	71.25		100000	5		18.0301	37.9108	0.313566	0.532081
		30.5	23.5		10000	4		22.4221	19.41	0.73515	0.82596
		3.25	23.75		1000	3		3.25	23.75	1	1
		16.75	47.25		100	2		6.48556	20.5279	0.387198	0.434454
		2166.75	1764.25		10	1		175.791	54.9293	0.0811313	0.0311347
		2620.75	2849.5		1	0		195.954	254.403	0.0747703	0.0892799
		3235.25	3190.5		0.1	-1		185.901	193.539	0.0574611	0.0606611
		2941.5	3057.25		0	-2		195.825	194.677	0.0665733	0.0636772
	Rimantidine (1:4)
		NS5A/WELL			CONC (uM)	LOG CONC		ST ERROR		% ERROR
		466.75	876.5		100	2		87.576	95.1818	0.187629	0.108593
		805	542		56.2	1.74974		89.0066	93.38	0.110567	0.172288
		958.5	815.25		31.6	1.49969		105.704	34.0988	0.110281	0.0418262
		1678.75	1351.25		17.8	1.25042		61.6392	174.066	0.0367173	0.128819
		1975.75	914.25		10	1		166.549	180.352	0.0842968	0.197267
		2689.25	2467		5.6	0.748188		201.079	92.1728	0.0747715	0.0373623
		2846	2846		3.16	0.499687		90.3336	138.012	0.0317406	0.0484931
		3426.25	2620.75		0	0.25		218.446	139.711	0.0637566	0.0533094
	LDS21 (1:4)
		NS5A/WELL			CONC (uM)	LOG CONC		ST ERROR		% ERROR
		221.25	265.75		100	2		45.6022	48.0908	0.206112	0.180963
		1340.75	1474		31.6	1.49969		32.6659	216.94	0.0243639	0.147178
		2190.75	2334		10	1		125.384	218.084	0.0572335	0.0934381
		2784.5	3033.75		3.16	0.499687		71.0464	115.205	0.0255149	0.0379745
		2870	3491		1	0		104.696	106.29	0.0364793	0.0304468
		3279.5	2802		0.316	-0.500313		84.1036	149.072	0.0256453	0.053202
		2986	3064.5		0.1	-1		221.879	103.737	0.0743063	0.0338513
		3552.75	3617.25		0	-1.5		98.1634	165.592	0.0276303	0.0457785
		Untreated
	NS5A +ve/well	4289.5	4160.25	4252	3842.5	4122.25	4132.75	4136	2914		3371.75	3419.5
	SE Error	301.082	406.906	276.856	199.069	415.428	283.768	337.623	475.8		293.737	144.775
		0.0701905	0.097808	0.0651119	0.0518071	0.100777	0.0686631	0.0816303	0.163281
		AVG untreated
			4133.61	3371.75	3419.5		UNSURE IF ANY GENUINE EFFECT
			143.706	293.737	144.775
			untreated
			LDS21.8 (500 nM)
			LDS21.9 (500 nM)

## Sheet: JFH1 1in8 drug plate
Barcode: JS-Exp002-JFH-1in8
Metric: JS-JFH1-96well-231014-Red Count (1/Well)
Cell Type: Huh7
Passage: 1
Notes: Exp#002 JFH1 1in8 drug plate 231014								Same plate layout as 1:4 drug plate
Analysis Job: JS-Exp002-JFH-1in8-231014
Time Stamp:	2014-10-23 17:20:00	Elapsed:	0	hours
JS-JFH1-96well-231014-Red Count (1/Well)
	1	2	3	4	5	6	7	8	9	10	11	12
A	0	1815.25	5549	5293.25	6986	5440	5034	1972	893.75	54.25	3030.5	0
B	0	2006.25	1778	1607.25	1603.75	1658	1672	2115.5	1726.5	0	583.25	0
C	0	1829	1590	1460.25	1859.5	1460.5	1538.75	1870	1685.75	10	436.5	3.25
D	0	1811.75	1811.75	1003	958.75	1191	1443.25	1798.25	1825.25	0	276.25	0
E	0	1651.25	1586.75	893.75	398.75	917.75	1122.5	1791.25	5679	0	2644.75	0
F	0	1252	5027	873	2023.75	1893.5	3539	1720	4747.25	0	945	0
G	0	815.25	1245.5	4368.25	4371.5	1989	5910.75	1078	2907.75	0	2433.25	0
H	0	651.25	682.25	907.5	433	3528.5	3870.25	3958.75	644.5	0	921	0
Std Error
	1	2	3	4	5	6	7	8	9	10	11	12
A	0	181.779	1653.25	1819.61	1093.62	648.977	1377.06	510.05	335.377	33.2726	1808.3	0
B	0	111.789	103.712	105.543	71.4194	41.1157	86.666	132.718	52.8843	0	169.091	0
C	0	167.907	223.255	132.649	147.558	164.799	123.603	121.956	137.492	6.44205	99.4531	3.25
D	0	55.0399	87.6131	79.8634	94.3295	103.803	20.2747	196.728	182.122	0	25.6852	0
E	0	85.8141	87.6455	524.668	29.708	141.317	171.135	89.236	2331.31	0	360.986	0
F	0	111.638	2190.24	339.712	1367.91	502.88	1531.17	177.705	1951.45	0	241.558	0
G	0	232.391	531.184	1717.8	2304.92	419.438	2500.83	47.3427	1361.84	0	276.806	0
H	0	65.0978	52.5569	199.322	91.204	2464.02	1858.21	2553.3	133.443	0	283.243	0
SOF		1815.25	2006.25	1829	1811.75	1651.25	1252	815.25	651.25		DCV		5293.25	1607.25	1460.25	1003	893.75	873	4368.25	907.5
		5549	1778	1590	1811.75	1586.75	5027	1245.5	682.25				6986	1603.75	1859.5	958.75	398.75	2023.75	4371.5	433
SOF ST ERR		181.779	111.789	167.907	55.0399	85.8141	111.638	232.391	65.0978		DCV ST ERROR		1819.61	105.543	132.649	79.8634	524.668	339.712	1717.8	199.322
		1653.25	103.712	223.255	87.6131	87.6455	2190.24	531.184	52.5569				1093.62	71.4194	147.558	94.3295	29.708	1367.91	2304.92	91.204
RIM		5440	1658	1460.5	1191	917.75	1893.5	1989	3528.5		LDS21		1972	2115.5	1870	1798.25	1791.25	1720	1078	3958.75
		5034	1672	1538.75	1443.25	1122.5	3539	5910.75	3870.25				893.75	1726.5	1685.75	1825.25	5679	4747.25	2907.75	644.5
RIM ST ERROR		648.977	41.1157	164.799	103.803	141.317	502.88	419.438	2464.02		LDS21 ST ERROR		510.05	132.718	121.956	196.728	89.236	177.705	47.3427	2553.3
		1377.06	86.666	123.603	20.2747	171.135	1531.17	2500.83	1858.21				335.377	52.8843	137.492	182.122	2331.31	1951.45	1361.84	133.443
	Sofosbuvir (1:4)
		NS5A/WELL			CONC (nM)	LOG CONC		ST ERROR		% ERROR
		651.25	682.25		10000	4		65.0978	52.5569	0.0999583	0.0770347
		815.25	1245.5		1000	3		232.391	531.184	0.285055	0.426483
		1252	5027		100	2		111.638	2190.24	0.0891676	0.435695			ALL 1 IN 8 DRUG PLATES CANNOT FIT IC50
		1651.25	1586.75		10	1		85.8141	87.6455	0.0519692	0.0552358			NOT SUFFICIENT SIGNAL TO NOISE
		1811.75	1811.75		1	0		55.0399	87.6131	0.0303794	0.0483583
		1829	1590		0.1	-1		167.907	223.255	0.0918027	0.140412
		2006.25	1778		0.01	-2		111.789	103.712	0.0557203	0.0583307
		1815.25	5549		0	-3		181.779	1653.25	0.10014	0.297936
	Daclatasvir (1:4)
		NS5A/WELL			CONC (pM)	LOG CONC		ST ERROR		% ERROR
		907.5	433		100000	5		199.322	91.204	0.219639	0.210633
		4368.25	4371.5		10000	4		1717.8	2304.92	0.393246	0.52726
		873	2023.75		1000	3		339.712	1367.91	0.389132	0.675929
		893.75	398.75		100	2		524.668	29.708	0.587041	0.0745027
		1003	958.75		10	1		79.8634	94.3295	0.0796246	0.098388
		1460.25	1859.5		1	0		132.649	147.558	0.0908403	0.0793537
		1607.25	1603.75		0.1	-1		105.543	71.4194	0.065667	0.0445327
		5293.25	6986		0	-2		1819.61	1093.62	0.34376	0.156545
	Rimantidine (1:4)
		NS5A/WELL			CONC (uM)	LOG CONC		ST ERROR		% ERROR
		3528.5	3870.25		100	2		2464.02	1858.21	0.698319	0.480126
		1989	5910.75		56.2	1.74974		419.438	2500.83	0.210879	0.423099
		1893.5	3539		31.6	1.49969		502.88	1531.17	0.265582	0.432656
		917.75	1122.5		17.8	1.25042		141.317	171.135	0.153982	0.152459
		1191	1443.25		10	1		103.803	20.2747	0.0871566	0.0140479
		1460.5	1538.75		5.6	0.748188		164.799	123.603	0.112837	0.080327
		1658	1672		3.16	0.499687		41.1157	86.666	0.0247984	0.0518337
		5440	5034		0	0.25		648.977	1377.06	0.119297	0.273552
	LDS21 (1:4)
		NS5A/WELL			CONC (uM)	LOG CONC		ST ERROR		% ERROR
		3958.75	644.5		100	2		2553.3	133.443	0.644977	0.207049
		1078	2907.75		31.6	1.49969		47.3427	1361.84	0.0439172	0.46835
		1720	4747.25		10	1		177.705	1951.45	0.103317	0.411071
		1791.25	5679		3.16	0.499687		89.236	2331.31	0.0498177	0.410514
		1798.25	1825.25		1	0		196.728	182.122	0.1094	0.0997794
		1870	1685.75		0.316	-0.500313		121.956	137.492	0.0652169	0.0815614
		2115.5	1726.5		0.1	-1		132.718	52.8843	0.062736	0.0306309
		1972	893.75		0	-1.5		510.05	335.377	0.258646	0.375247
