# Supplementary material for: Rationally derived inhibitors of hepatitis C virus (HCV) p7 channel activity reveal prospect for bimodal antiviral therapy
Source: eLife journal article supplement (doi:10.7554/elife.52555), 2020-11-10
Supplement: fig1-figsupp2-data1 [file R Gosain Express 58.xlsx]

## Sheet: Sheet1
	R Gosain		R Gosain
Plate Barcode	1191-108		JK3/32
concentration (uM)	10		10
MKK1	112.619	6.4418	122.37	16.2238
JNK1	117.338	2.14529	119.708	8.23759
p38a MAPK	105.786	0.672762	115.014	9.15129
RSK1	92.3189	8.27664	115.079	14.9868
PDK1	113.349	0.530311	121.39	9.06953
PKBa	123.734	5.3073	111.605	11.2464
SGK1	101.217	17.217	103.481	8.46293
S6K1	116.118	8.30458	123.79	3.09356
PKA	104.993	1.4092	109.274	5.65856
ROCK 2	127.341	17.8072	122.866	0.888551
PRK2	95.9051	2.26991	96.5917	4.44409
PKCa	114.41	0.122025	125.594	3.1451
PKD1	105.093	14.7915	142.834	11.2843
MSK1	110.687	14.5484	115.363	15.1948
CAMKKb	108.74	6.64788	108.488	20.9153
CAMK1	95.3266	1.06189	109.899	1.98676
SmMLCK	100.104	0.0570172	113.522	3.30181
CHK2	112.814	7.53173	119.081	13.6422
GSK3b	103.932	0.0260781	107.528	4.74621
PLK1	105.882	12.1601	102.239	2.79385
Aurora B	115.852	20.046	121.725	12.0611
LKB1	132.436	5.14995	118.13	5.51781
AMPK (hum)	98.855	20.101	102.553	7.08551
MARK3	94.9965	5.02173	100.429	1.68133
CK1δ	103.638	9.7523	112.336	1.2743
CK2	100.006	0.965059	101.472	2.86475
DYRK1A	104.969	0.296197	113.153	0.32104
NEK6	98.8006	9.85874	102.343	16.7905
TBK1	100.621	7.61171	98.6657	3.90134
PIM1	116.475	10.4809	120.531	10.9766
SRPK1	96.0126	9.70373	103.456	5.31566
EF2K	102.138	2.43889	104.967	8.46782
HIPK2	111.668	10.9135	116.331	7.5762
PAK4	95.6258	7.70087	100.438	5.73088
MST2	126.3	3.63161	134.988	6.2231
MLK3	95.3736	4.44	99.6618	3.14049
TAK1	111.64	19.7779	84.4898	7.4269
IRAK4	105.533	5.43538	87.6194	6.2788
RIPK2	122.156	9.37072	136.957	7.21493
TTK	105.573	5.64643	122.082	8.17003
Src	110.589	13.1669	97.3667	9.39111
Lck	100.425	14.6942	109.019	2.2098
BTK	94.1087	11.6104	99.9561	4.96172
JAK2	113.519	0.969338	109.01	12.3463
SYK	83.9726	6.69996	108.049	18.5459
EPH-A2	115.682	13.0019	127.099	9.58436
HER4	101.769	6.8779	101.418	4.91697
IGF-1R	92.0287	2.69292	114.076	8.1422
TrkA	111.901	4.69771	122.871	9.92431
VEG-FR	119.096	11.7617	128.489	12.2558
