# Supplementary material for: Rationally derived inhibitors of hepatitis C virus (HCV) p7 channel activity reveal prospect for bimodal antiviral therapy
Source: eLife journal article supplement (doi:10.7554/elife.52555), 2020-11-10
Supplement: fig1-figsupp4-data1 [file RScpd-liposomes.xlsx]

## Sheet: Sheet1
				%		Avg	SD		Ttest v DMSO
Liposomes	1694	1688		11.2141	11.2751	11.2446	0.0431652
Solvent	1786	1784		11.8231	11.9164	11.8697	0.0659412
p7	15106	14971		100	100	100	0
Rim (40 mM)	8135	8057		53.8528	53.8174	53.8351	0.025027		0.00024404
R5	7927	7803		52.4758	52.1208	52.2983	0.251073		0.00236935
R6	11286	11107		74.712	74.1901	74.4511	0.369063		0.00650246
R7	7028	6917		46.5246	46.2027	46.3636	0.227619		0.00191035
R8	8469	8337		56.0638	55.6877	55.8757	0.26598		0.00271353
R9	6721	6511		44.4923	43.4907	43.9915	0.708172		0.00569165
R10	7347	7229		48.6363	48.2867	48.4615	0.247216		0.00215927
R11	13488	13659		89.289	91.2364	90.2627	1.377		0.063448
R12	13044	11515		86.3498	76.9154	81.6326	6.67115		0.160041
R13	11730	11823		77.6513	78.9727	78.312	0.934382		0.0193881
R14	10688	10594		70.7533	70.7635	70.7584	0.00716512		0.000110303
R16	8544	8314		56.5603	55.534	56.0472	0.725686		0.00743203
R17	8848	8939		58.5728	59.7088	59.1408	0.803286		0.00884946
R18	8186	9129		54.1904	60.9779	57.5841	4.79949		0.0508285
R21	9623	10176		63.7032	67.9714	65.8373	3.01811		0.0397176
R22	10212	11668		67.6023	77.9373	72.7698	7.308		0.119393
