# Supplementary material for: Rationally derived inhibitors of hepatitis C virus (HCV) p7 channel activity reveal prospect for bimodal antiviral therapy
Source: eLife journal article supplement (doi:10.7554/elife.52555), 2020-11-10
Supplement: fig2-data1 [file Jalview-numbers.xlsx]

## Sheet: Sheet1
	EU HCV Database (1456 aligned sequences)
	Position
	1	98.6264	A	A 98.63%	T 0.69%	P 0.14%	V 0.14%	L 0.07%
	2	97.3901	L	L 97.39%	V 1.44%	M 0.69%	C 0.07%	F 0.07%	W 0.07%
	3	96.6346	E	E 96.63%	A 1.30%	S 0.89%	G 0.27%	K 0.21%	T 0.21%	V 0.14%	C 0.07%	R 0.07%
	4	93.75	N	N 93.75%	K 4.19%	R 1.24%	D 0.27%	T 0.14%	G 0.07%	I 0.07%	S 0.07%
	5	99.5192	L	L 99.52%	V 0.21%	C 0.07%	M 0.07%
	6	88.9423	V	V 88.94%	I 10.37%	A 0.34%	F 0.14%	H 0.07%	M 0.07%
	7	63.2555	V	V 63.26%	I 18.82%	L 10.71%	T 4.46%	N 1.58%	A 0.48%	M 0.48%	H 0.07%	P 0.07%	S 0.07%
	8	96.3599	L	L 96.36%	I 3.23%	P 0.14%	E 0.07%	F 0.07%	T 0.07%	V 0.07%
	9	95.467	N	N 95.47%	H 4.19%	K 0.14%	D 0.07%	R 0.07%	Y 0.07%
	10	97.1154	A	A 97.12%	S 2.06%	V 0.62%	P 0.07%	R 0.07%	T 0.07%
	11	94.6429	A	A 94.64%	V 3.30%	T 0.96%	L 0.34%	M 0.34%	I 0.27%	S 0.14%
	12	96.1539	S	S 96.15%	A 3.64%	C 0.07%	P 0.07%	T 0.07%
	13	46.0852	L	L 46.09%	V 39.08%	A 14.01%	M 0.62%	C 0.07%	I 0.07%	T 0.07%
	14	97.3901	A	A 97.39%	V 1.44%	T 0.82%	S 0.27%	R 0.07%
	15	91.3461	G	G 91.35%	S 7.69%	R 0.48%	A 0.21%	D 0.14%	C 0.07%	N 0.07%
	16	54.3956	T	T 54.40%	A 35.71%	N 1.85%	S 1.85%	V 1.79%	C 1.65%	M 0.96%	I 0.76%	E 0.34%	K 0.34%	F 0.14%	L 0.14%	Q 0.07%
	17	89.6291	H	H 89.63%	N 3.91%	Q 3.02%	R 1.37%	A 1.03%	Y 0.41%	C 0.27%	V 0.14%	D 0.07%	T 0.07%	W 0.07%
	18	96.5659	G	G 96.57%	S 3.16%	D 0.07%	N 0.07%	R 0.07%	Y 0.07%
	19	41.4835	L	L 41.48%	I 36.68%	F 8.04%	W 3.85%	T 3.43%	V 3.09%	P 2.34%	M 0.62%	A 0.21%	C 0.07%	H 0.07%	R 0.07%	Y 0.07%
	20	45.6731	L	L 45.67%	V 29.67%	A 12.23%	F 3.57%	G 3.16%	W 2.47%	I 1.44%	M 0.55%	Y 0.27%	C 0.21%	P 0.21%	S 0.21%	E 0.14%	H 0.07%	Q 0.07%	T 0.07%
	21	77.1978	S	S 77.20%	W 8.79%	P 7.35%	Y 3.64%	C 1.58%	A 0.62%	F 0.48%	H 0.14%	R 0.07%	T 0.07%
	22	86.195	F	F 86.20%	A 3.71%	L 3.30%	Y 2.61%	G 2.20%	C 1.51%	S 0.34%	T 0.07%	V 0.07%
	23	89.0797	L	L 89.08%	F 3.85%	I 3.78%	V 2.34%	A 0.27%	P 0.27%	M 0.21%	T 0.21%
	24	86.0577	V	V 86.06%	I 5.91%	L 4.40%	A 1.85%	F 0.82%	M 0.82%	G 0.14%
	25	95.8104	F	F 95.81%	A 2.34%	V 1.10%	L 0.48%	Y 0.14%	S 0.07%
	26	92.3077	F	F 92.31%	I 4.60%	L 2.06%	V 0.82%	S 0.14%	M 0.07%
	27	95.1923	C	C 95.19%	V 1.65%	I 1.51%	T 1.30%	L 0.14%	A 0.07%	R 0.07%	S 0.07%
	28	52.7473	A	A 52.75%	F 38.32%	C 2.75%	L 2.61%	V 1.51%	I 1.44%	S 0.27%	T 0.14%	W 0.14%	R 0.07%
	29	97.2528	A	A 97.25%	V 2.20%	T 0.21%	C 0.07%	G 0.07%	I 0.07%	P 0.07%	S 0.07%
	30	99.2445	W	W 99.24%	R 0.55%	G 0.07%	M 0.07%	V 0.07%
	31	92.1017	Y	Y 92.10%	H 7.14%	C 0.41%	V 0.14%	D 0.07%	F 0.07%	W 0.07%
	32	50.6181	I	I 50.62%	L 42.31%	V 6.66%	F 0.27%	M 0.07%	R 0.07%
	33	92.5824	K	K 92.58%	R 7.21%	A 0.07%	E 0.07%	Q 0.07%
	34	99.7939	G	G 99.79%	S 0.14%	D 0.07%
	35	70.9478	R	R 70.95%	K 28.91%	E 0.07%	G 0.07%
	36	51.0302	L	L 51.03%	W 40.59%	V 3.57%	A 2.82%	F 0.89%	I 0.41%	C 0.21%	Y 0.21%	G 0.07%	P 0.07%	S 0.07%	T 0.07%
	37	89.9725	V	V 89.97%	A 5.91%	P 2.61%	I 0.89%	T 0.34%	M 0.14%	F 0.07%	G 0.07%
	38	97.3214	P	P 97.32%	A 2.61%	S 0.07%
	39	85.0961	G	G 85.10%	A 6.25%	L 5.56%	V 1.72%	M 0.76%	I 0.41%	E 0.07%	R 0.07%	S 0.07%
	40	82.4863	A	A 82.49%	V 12.36%	T 1.72%	C 1.17%	F 0.96%	L 0.55%	M 0.34%	S 0.21%	I 0.14%	G 0.07%
	41	64.2857	A	A 64.29%	V 22.87%	T 12.50%	I 0.14%	L 0.14%	G 0.07%
	42	99.9313	Y	Y 99.93%	D 0.07%
	43	79.533	A	A 79.53%	T 8.38%	S 6.39%	G 2.82%	V 1.44%	M 0.89%	I 0.34%	L 0.14%	C 0.07%
	44	39.1484	L	L 39.15%	F 37.57%	V 8.65%	I 7.21%	A 5.56%	Y 0.89%	C 0.34%	T 0.27%	S 0.21%	W 0.14%
	45	84.8901	Y	Y 84.89%	L 7.90%	T 3.78%	C 2.82%	H 0.21%	A 0.07%	F 0.07%	I 0.07%	M 0.07%	N 0.07%	V 0.07%
	46	95.1236	G	G 95.12%	Q 3.23%	S 1.17%	D 0.14%	N 0.14%	R 0.14%	H 0.07%
	47	44.4368	M	M 44.44%	V 42.99%	L 10.37%	A 0.76%	I 0.76%	T 0.55%	C 0.07%	Q 0.07%
	48	99.7253	W	W 99.73%	R 0.14%	C 0.07%	G 0.07%
	49	94.2308	P	P 94.23%	S 5.70%	A 0.07%
	50	93.8874	L	L 93.89%	F 5.56%	M 0.27%	I 0.14%	C 0.07%	V 0.07%
	51	91.3461	L	L 91.35%	F 3.64%	A 2.68%	C 1.03%	S 0.76%	V 0.34%	P 0.14%	G 0.07%
	52	99.0385	L	L 99.04%	M 0.27%	F 0.21%	P 0.21%	V 0.21%	I 0.07%
	53	98.5577	L	L 98.56%	T 0.89%	V 0.21%	A 0.14%	M 0.07%	P 0.07%	Q 0.07%
	54	89.3544	L	L 89.35%	V 7.97%	I 2.40%	D 0.07%	M 0.07%	R 0.07%	S 0.07%
	55	98.489	L	L 98.49%	M 0.96%	V 0.21%	I 0.14%	F 0.07%	S 0.07%	W 0.07%
	56	90.7967	A	A 90.80%	L 3.02%	T 1.92%	M 1.51%	S 1.44%	V 0.69%	C 0.62%
	57	99.7253	L	L 99.73%	M 0.14%	F 0.07%	R 0.07%
	58	99.7939	P	P 99.79%	L 0.14%	A 0.07%
	59	49.7253	Q	Q 49.73%	P 43.20%	H 2.27%	E 2.06%	R 1.79%	S 0.55%	A 0.14%	D 0.07%	G 0.07%	L 0.07%	Y 0.07%
	60	95.1923	R	R 95.19%	Q 4.60%	G 0.14%	L 0.07%
	61	100	A	A 100.00%
	62	97.2528	Y	Y 97.25%	F 2.27%	H 0.21%	C 0.14%	L 0.14%
	63	99.9313	A	A 99.93%	G 0.07%

## Sheet: Sheet2
		98.6264	A	A 98.63%	T 0.69%	P 0.14%	V 0.14%	L 0.07%
		97.3901	L	L 97.39%	V 1.44%	M 0.69%	C 0.07%	F 0.07%	W 0.07%
		96.6346	E	E 96.63%	A 1.30%	S 0.89%	G 0.27%	K 0.21%	T 0.21%	V 0.14%	C 0.07%	R 0.07%
		93.75	N	N 93.75%	K 4.19%	R 1.24%	D 0.27%	T 0.14%	G 0.07%	I 0.07%	S 0.07%
		99.5192	L	L 99.52%	V 0.21%	C 0.07%	M 0.07%
		88.9423	V	V 88.94%	I 10.37%	A 0.34%	F 0.14%	H 0.07%	M 0.07%
		63.2555	V	V 63.26%	I 18.82%	L 10.71%	T 4.46%	N 1.58%	A 0.48%	M 0.48%	H 0.07%	P 0.07%	S 0.07%
		96.3599	L	L 96.36%	I 3.23%	P 0.14%	E 0.07%	F 0.07%	T 0.07%	V 0.07%
		95.467	N	N 95.47%	H 4.19%	K 0.14%	D 0.07%	R 0.07%	Y 0.07%
		97.1154	A	A 97.12%	S 2.06%	V 0.62%	P 0.07%	R 0.07%	T 0.07%
		94.6429	A	A 94.64%	V 3.30%	T 0.96%	L 0.34%	M 0.34%	I 0.27%	S 0.14%
		96.1539	S	S 96.15%	A 3.64%	C 0.07%	P 0.07%	T 0.07%
		46.0852	L	L 46.09%	V 39.08%	A 14.01%	M 0.62%	C 0.07%	I 0.07%	T 0.07%
		97.3901	A	A 97.39%	V 1.44%	T 0.82%	S 0.27%	R 0.07%
		91.3461	G	G 91.35%	S 7.69%	R 0.48%	A 0.21%	D 0.14%	C 0.07%	N 0.07%
		54.3956	T	T 54.40%	A 35.71%	N 1.85%	S 1.85%	V 1.79%	C 1.65%	M 0.96%	I 0.76%	E 0.34%	K 0.34%	F 0.14%	L 0.14%	Q 0.07%
		89.6291	H	H 89.63%	N 3.91%	Q 3.02%	R 1.37%	A 1.03%	Y 0.41%	C 0.27%	V 0.14%	D 0.07%	T 0.07%	W 0.07%
		96.5659	G	G 96.57%	S 3.16%	D 0.07%	N 0.07%	R 0.07%	Y 0.07%
		41.4835	L	L 41.48%	I 36.68%	F 8.04%	W 3.85%	T 3.43%	V 3.09%	P 2.34%	M 0.62%	A 0.21%	C 0.07%	H 0.07%	R 0.07%	Y 0.07%
		45.6731	L	L 45.67%	V 29.67%	A 12.23%	F 3.57%	G 3.16%	W 2.47%	I 1.44%	M 0.55%	Y 0.27%	C 0.21%	P 0.21%	S 0.21%	E 0.14%	H 0.07%	Q 0.07%	T 0.07%
		77.1978	S	S 77.20%	W 8.79%	P 7.35%	Y 3.64%	C 1.58%	A 0.62%	F 0.48%	H 0.14%	R 0.07%	T 0.07%
		86.195	F	F 86.20%	A 3.71%	L 3.30%	Y 2.61%	G 2.20%	C 1.51%	S 0.34%	T 0.07%	V 0.07%
		89.0797	L	L 89.08%	F 3.85%	I 3.78%	V 2.34%	A 0.27%	P 0.27%	M 0.21%	T 0.21%
		86.0577	V	V 86.06%	I 5.91%	L 4.40%	A 1.85%	F 0.82%	M 0.82%	G 0.14%
		95.8104	F	F 95.81%	A 2.34%	V 1.10%	L 0.48%	Y 0.14%	S 0.07%
		92.3077	F	F 92.31%	I 4.60%	L 2.06%	V 0.82%	S 0.14%	M 0.07%
		95.1923	C	C 95.19%	V 1.65%	I 1.51%	T 1.30%	L 0.14%	A 0.07%	R 0.07%	S 0.07%
		52.7473	A	A 52.75%	F 38.32%	C 2.75%	L 2.61%	V 1.51%	I 1.44%	S 0.27%	T 0.14%	W 0.14%	R 0.07%
		97.2528	A	A 97.25%	V 2.20%	T 0.21%	C 0.07%	G 0.07%	I 0.07%	P 0.07%	S 0.07%
		99.2445	W	W 99.24%	R 0.55%	G 0.07%	M 0.07%	V 0.07%
		92.1017	Y	Y 92.10%	H 7.14%	C 0.41%	V 0.14%	D 0.07%	F 0.07%	W 0.07%
		50.6181	I	I 50.62%	L 42.31%	V 6.66%	F 0.27%	M 0.07%	R 0.07%
		92.5824	K	K 92.58%	R 7.21%	A 0.07%	E 0.07%	Q 0.07%
		99.7939	G	G 99.79%	S 0.14%	D 0.07%
		70.9478	R	R 70.95%	K 28.91%	E 0.07%	G 0.07%
		51.0302	L	L 51.03%	W 40.59%	V 3.57%	A 2.82%	F 0.89%	I 0.41%	C 0.21%	Y 0.21%	G 0.07%	P 0.07%	S 0.07%	T 0.07%
		89.9725	V	V 89.97%	A 5.91%	P 2.61%	I 0.89%	T 0.34%	M 0.14%	F 0.07%	G 0.07%
		97.3214	P	P 97.32%	A 2.61%	S 0.07%
		85.0961	G	G 85.10%	A 6.25%	L 5.56%	V 1.72%	M 0.76%	I 0.41%	E 0.07%	R 0.07%	S 0.07%
		82.4863	A	A 82.49%	V 12.36%	T 1.72%	C 1.17%	F 0.96%	L 0.55%	M 0.34%	S 0.21%	I 0.14%	G 0.07%
		64.2857	A	A 64.29%	V 22.87%	T 12.50%	I 0.14%	L 0.14%	G 0.07%
		99.9313	Y	Y 99.93%	D 0.07%
		79.533	A	A 79.53%	T 8.38%	S 6.39%	G 2.82%	V 1.44%	M 0.89%	I 0.34%	L 0.14%	C 0.07%
		39.1484	L	L 39.15%	F 37.57%	V 8.65%	I 7.21%	A 5.56%	Y 0.89%	C 0.34%	T 0.27%	S 0.21%	W 0.14%
		84.8901	Y	Y 84.89%	L 7.90%	T 3.78%	C 2.82%	H 0.21%	A 0.07%	F 0.07%	I 0.07%	M 0.07%	N 0.07%	V 0.07%
		95.1236	G	G 95.12%	Q 3.23%	S 1.17%	D 0.14%	N 0.14%	R 0.14%	H 0.07%
		44.4368	M	M 44.44%	V 42.99%	L 10.37%	A 0.76%	I 0.76%	T 0.55%	C 0.07%	Q 0.07%
		99.7253	W	W 99.73%	R 0.14%	C 0.07%	G 0.07%
		94.2308	P	P 94.23%	S 5.70%	A 0.07%
		93.8874	L	L 93.89%	F 5.56%	M 0.27%	I 0.14%	C 0.07%	V 0.07%
		91.3461	L	L 91.35%	F 3.64%	A 2.68%	C 1.03%	S 0.76%	V 0.34%	P 0.14%	G 0.07%
		99.0385	L	L 99.04%	M 0.27%	F 0.21%	P 0.21%	V 0.21%	I 0.07%
		98.5577	L	L 98.56%	T 0.89%	V 0.21%	A 0.14%	M 0.07%	P 0.07%	Q 0.07%
		89.3544	L	L 89.35%	V 7.97%	I 2.40%	D 0.07%	M 0.07%	R 0.07%	S 0.07%
		98.489	L	L 98.49%	M 0.96%	V 0.21%	I 0.14%	F 0.07%	S 0.07%	W 0.07%
		90.7967	A	A 90.80%	L 3.02%	T 1.92%	M 1.51%	S 1.44%	V 0.69%	C 0.62%
		99.7253	L	L 99.73%	M 0.14%	F 0.07%	R 0.07%
		99.7939	P	P 99.79%	L 0.14%	A 0.07%
		49.7253	Q	Q 49.73%	P 43.20%	H 2.27%	E 2.06%	R 1.79%	S 0.55%	A 0.14%	D 0.07%	G 0.07%	L 0.07%	Y 0.07%
		95.1923	R	R 95.19%	Q 4.60%	G 0.14%	L 0.07%
		100	A	A 100.00%
		97.2528	Y	Y 97.25%	F 2.27%	H 0.21%	C 0.14%	L 0.14%
		99.9313	A	A 99.93%	G 0.07%
