# Supplementary material for: Rationally derived inhibitors of hepatitis C virus (HCV) p7 channel activity reveal prospect for bimodal antiviral therapy
Source: eLife journal article supplement (doi:10.7554/elife.52555), 2020-11-10
Supplement: fig3-figsupp2-data1 [file Simulation-result-Rimantadine.pdf › SD-figureS7/Simulation-result-Rimantadine.pdf]

## Wild-Type

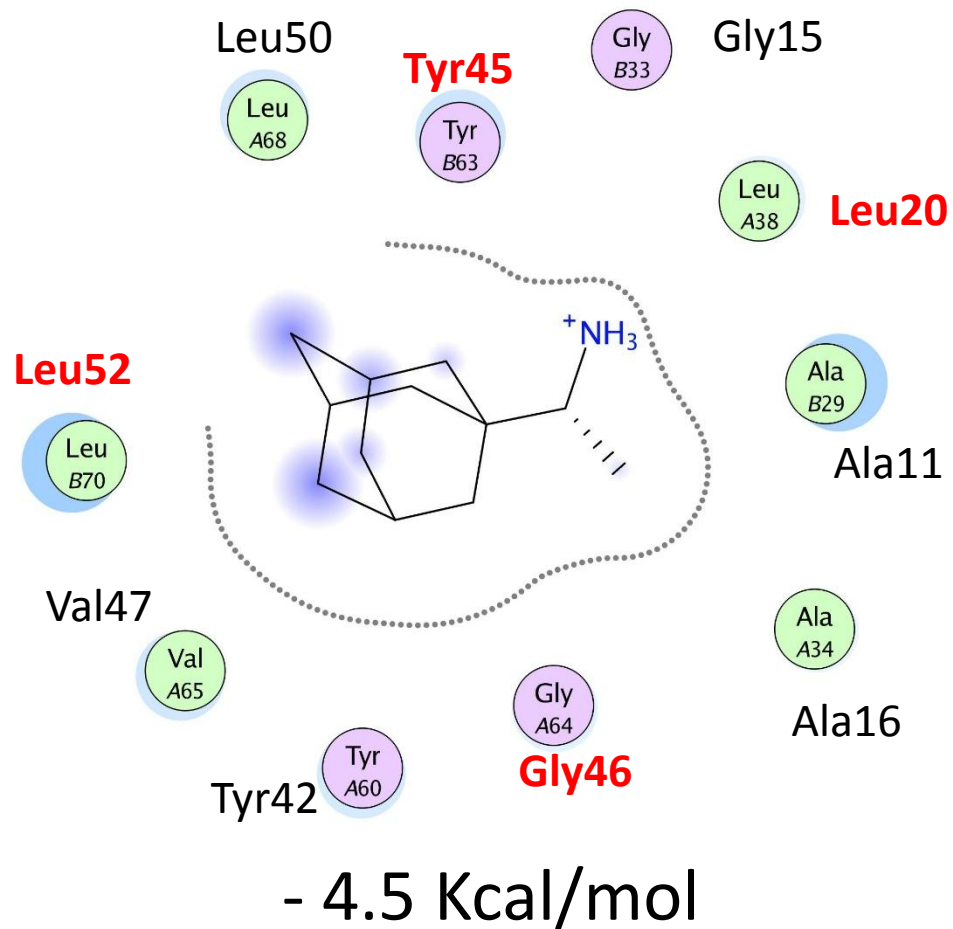

## L20F Mutation

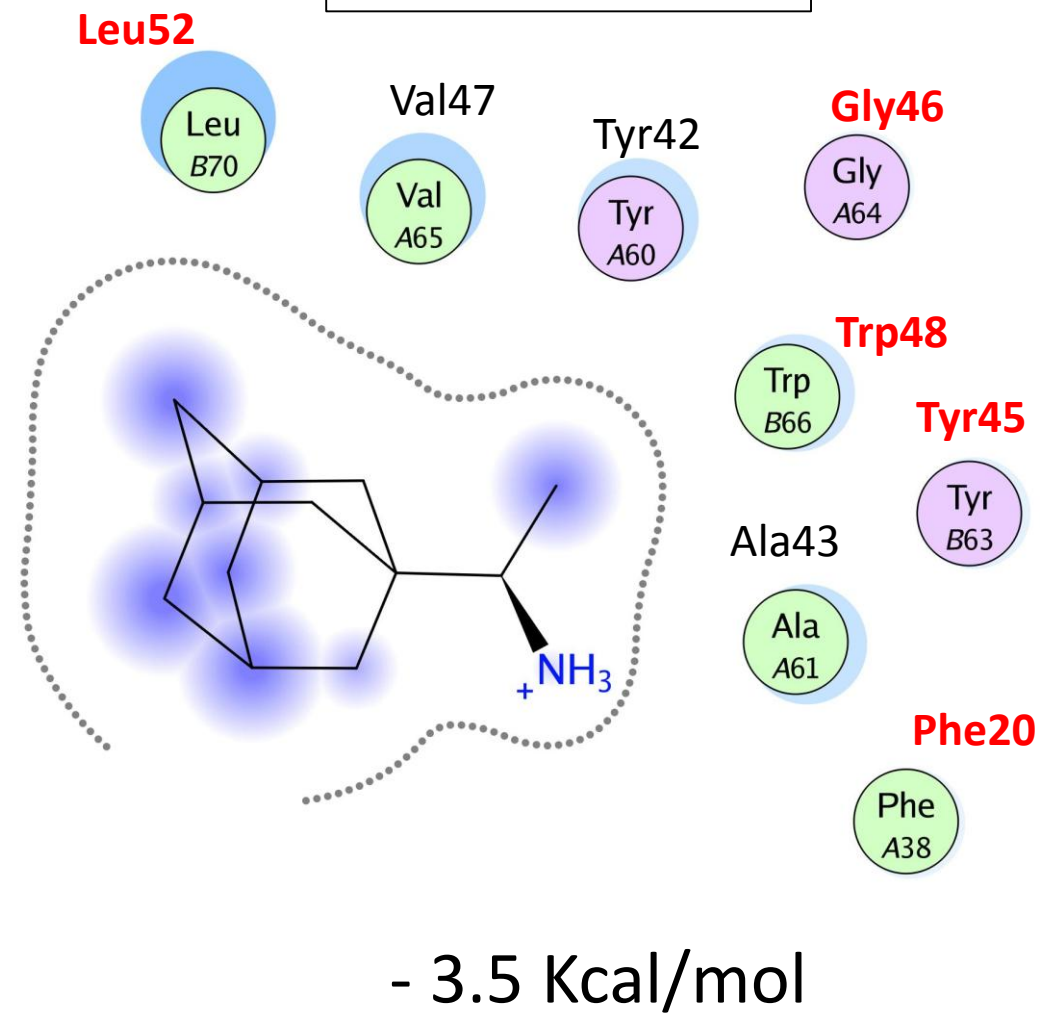

- |                     |                      |                     |                 |
|---------------------|----------------------|---------------------|-----------------|
| ○ polar             | → sidechain acceptor | ○ solvent residue   | ⊞ arene-arene   |
| ○ acidic            | ← sidechain donor    | ○ metal complex     | ⊞H arene-H      |
| ○ basic             | → backbone acceptor  | → solvent contact   | ⊞+ arene-cation |
| ○ greasy            | ← backbone donor     | → metal/ion contact |                 |
| ○ proximity contour | ● ligand exposure    | ○ receptor exposure |                 |

# Simulation Results

All the simulations were carried out for 100ns. A blank simulation was carried out without any ligand docked into it.

# Wild type protein

100ns

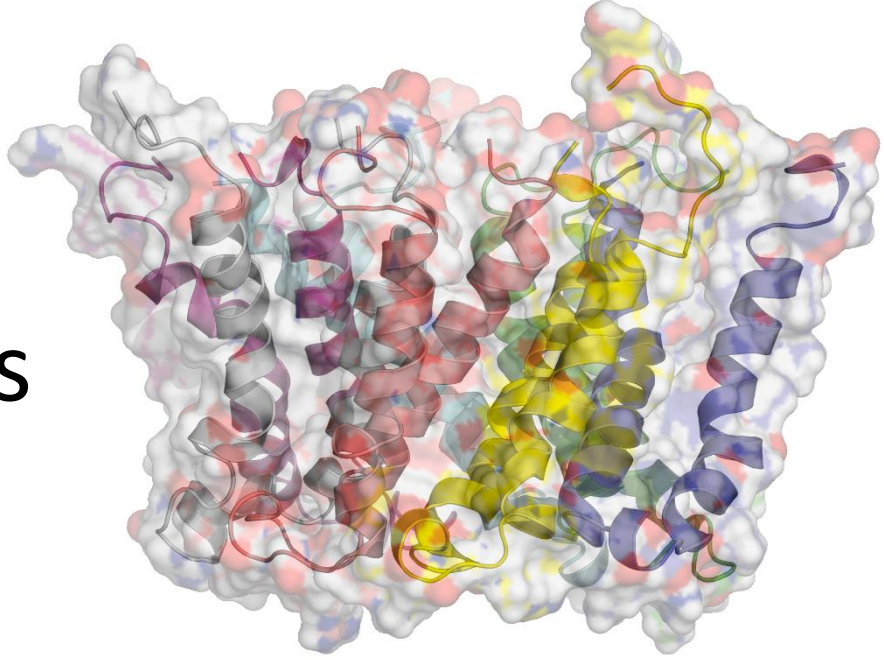

0ns

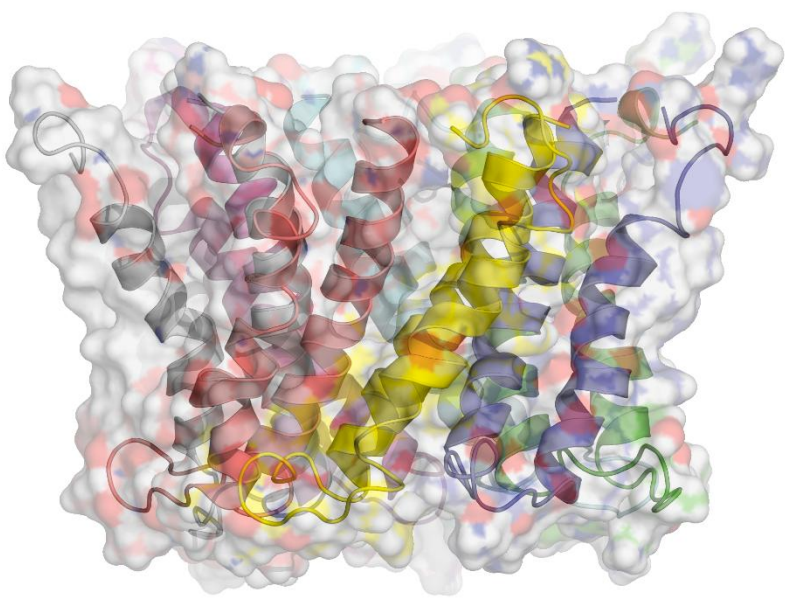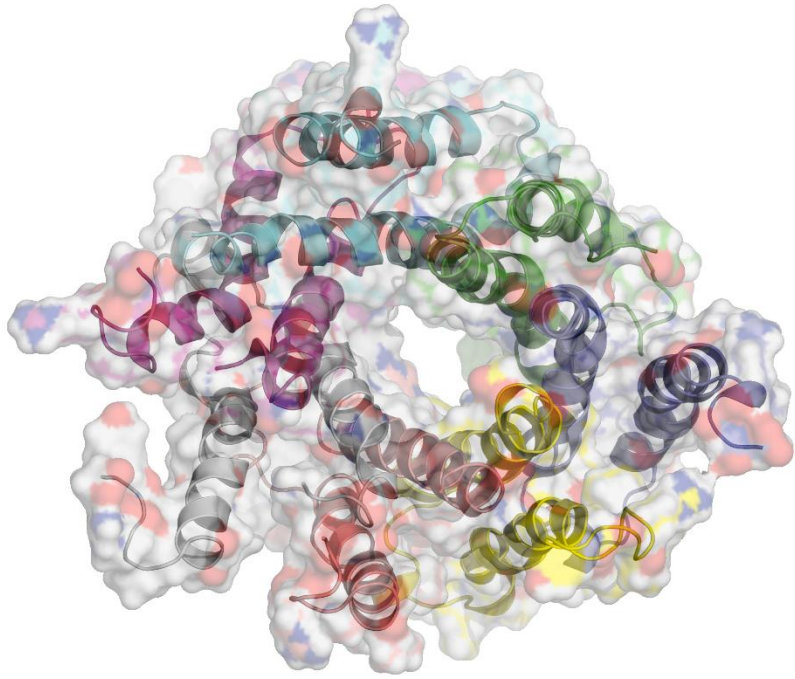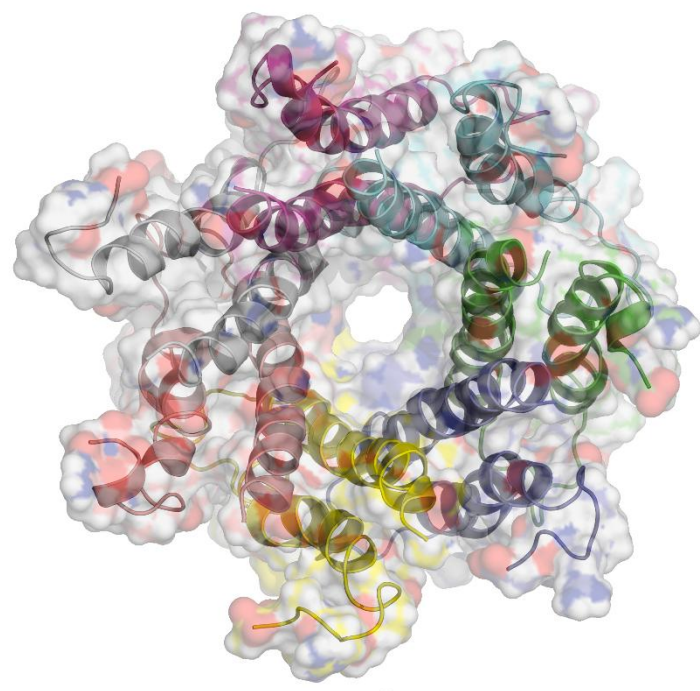

Protein without any ligand



# Wild type protein

100ns

0ns

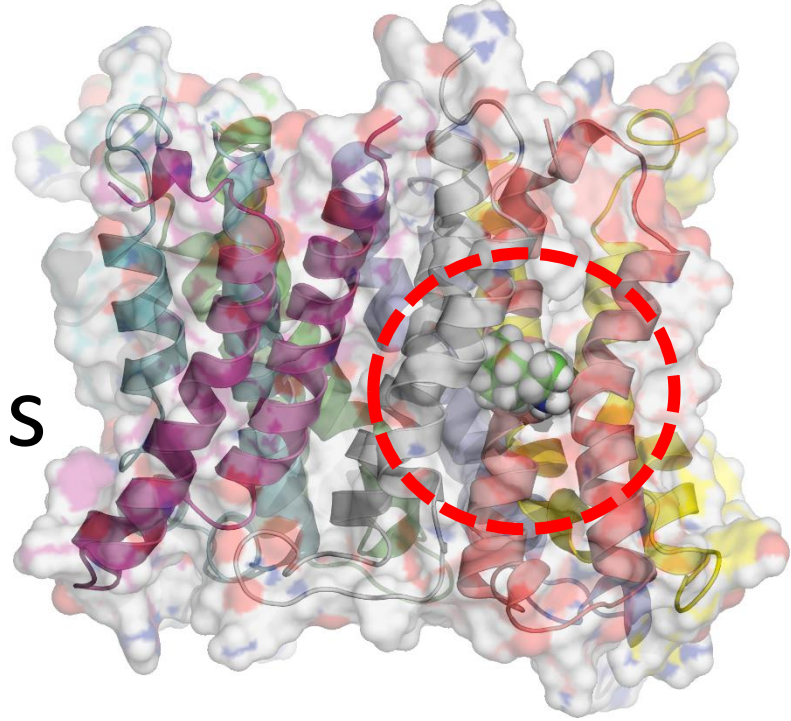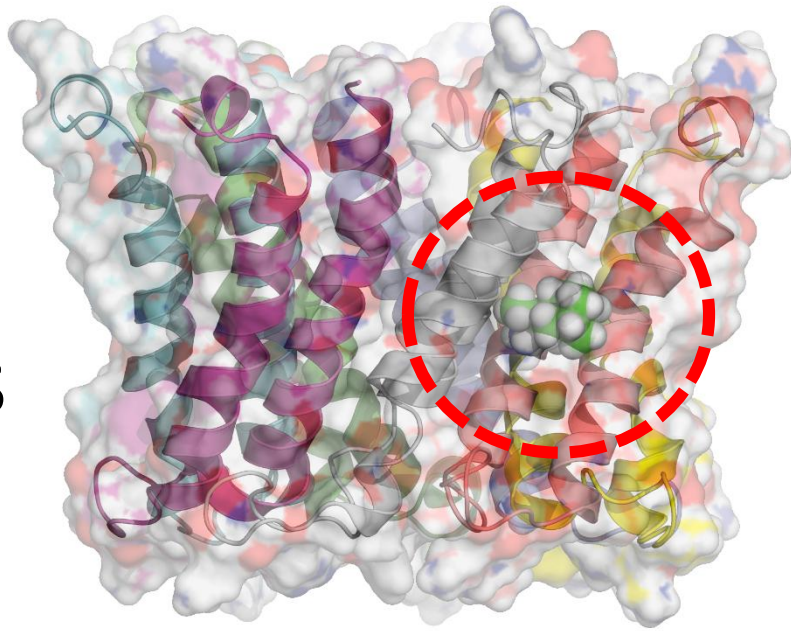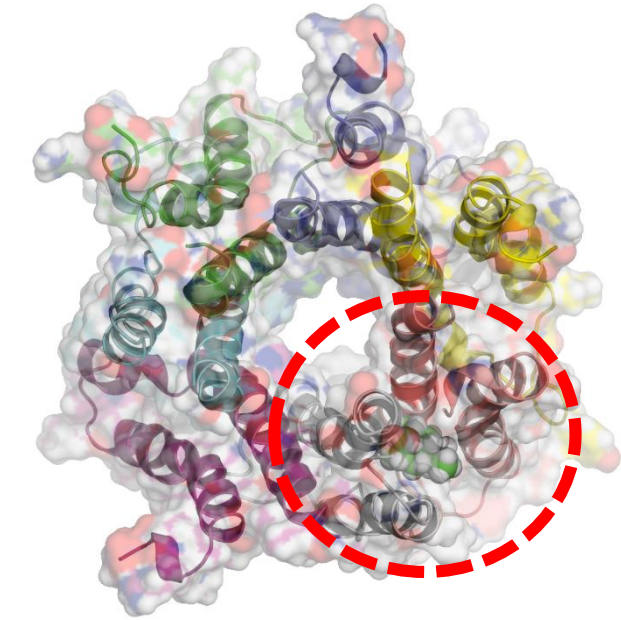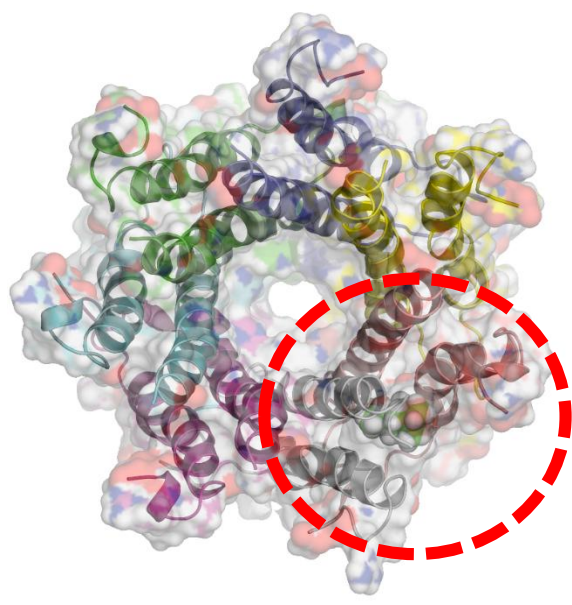

# Protein with Rimantadine



100ns

0ns

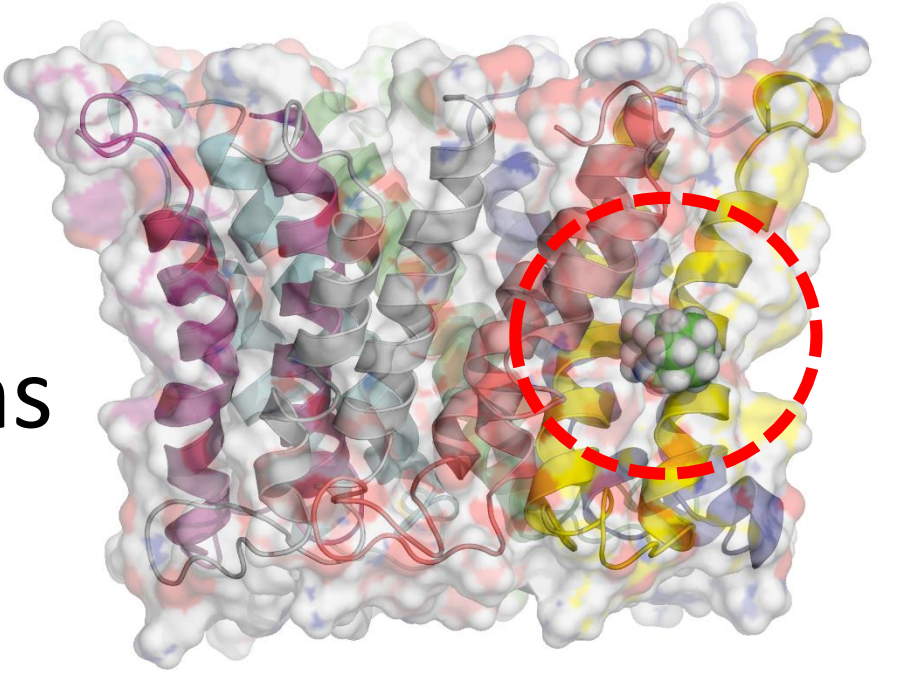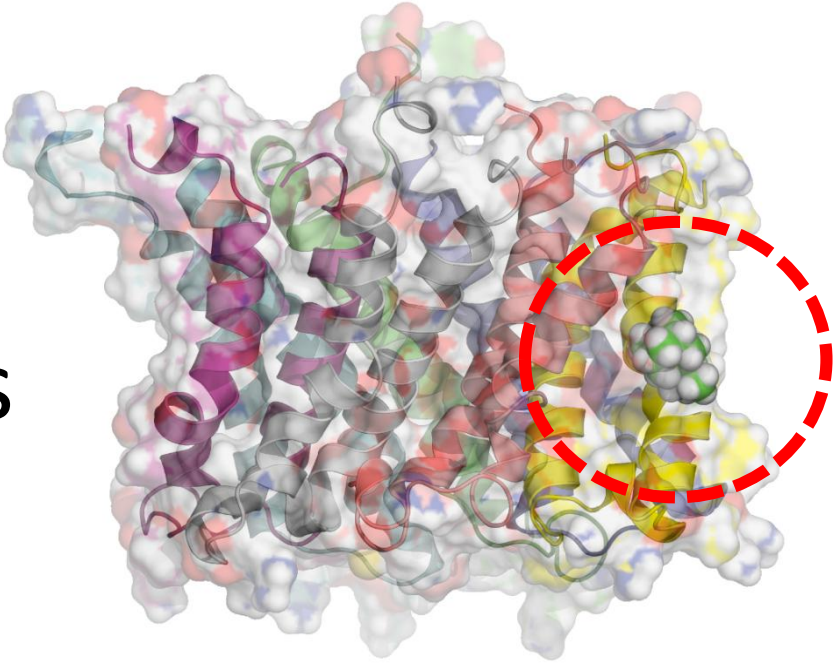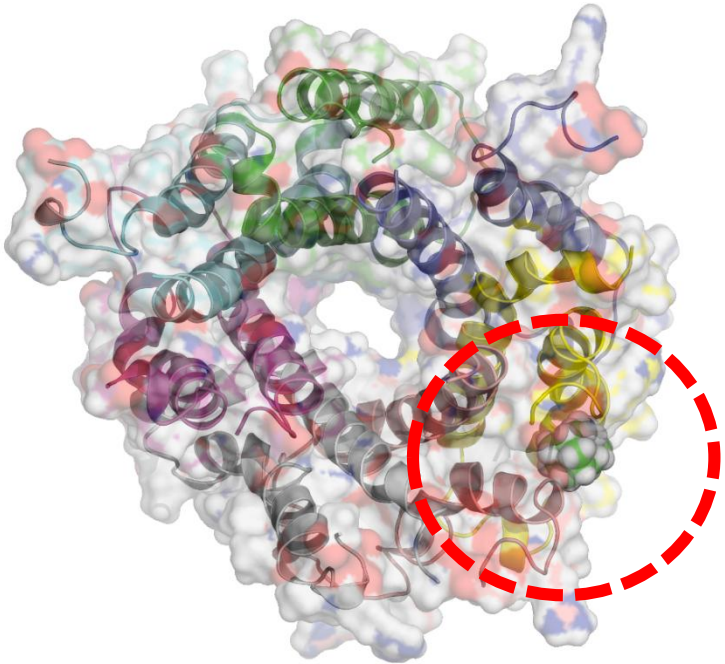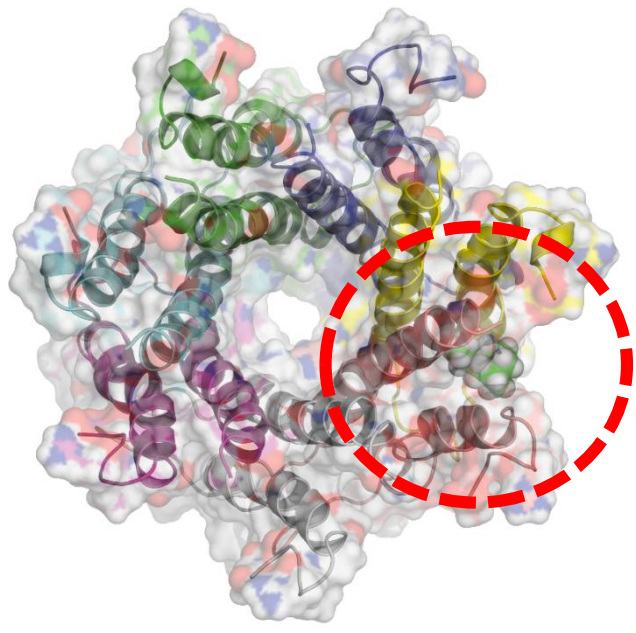

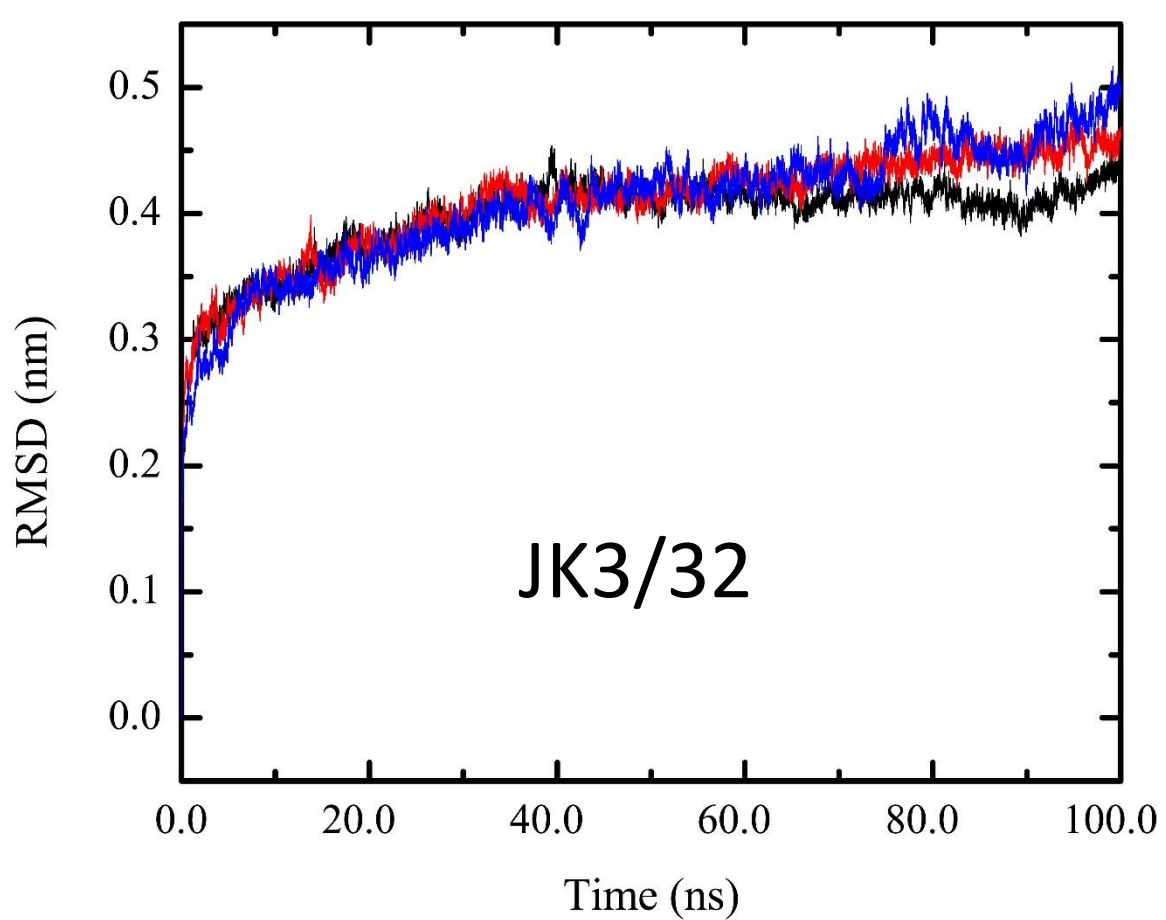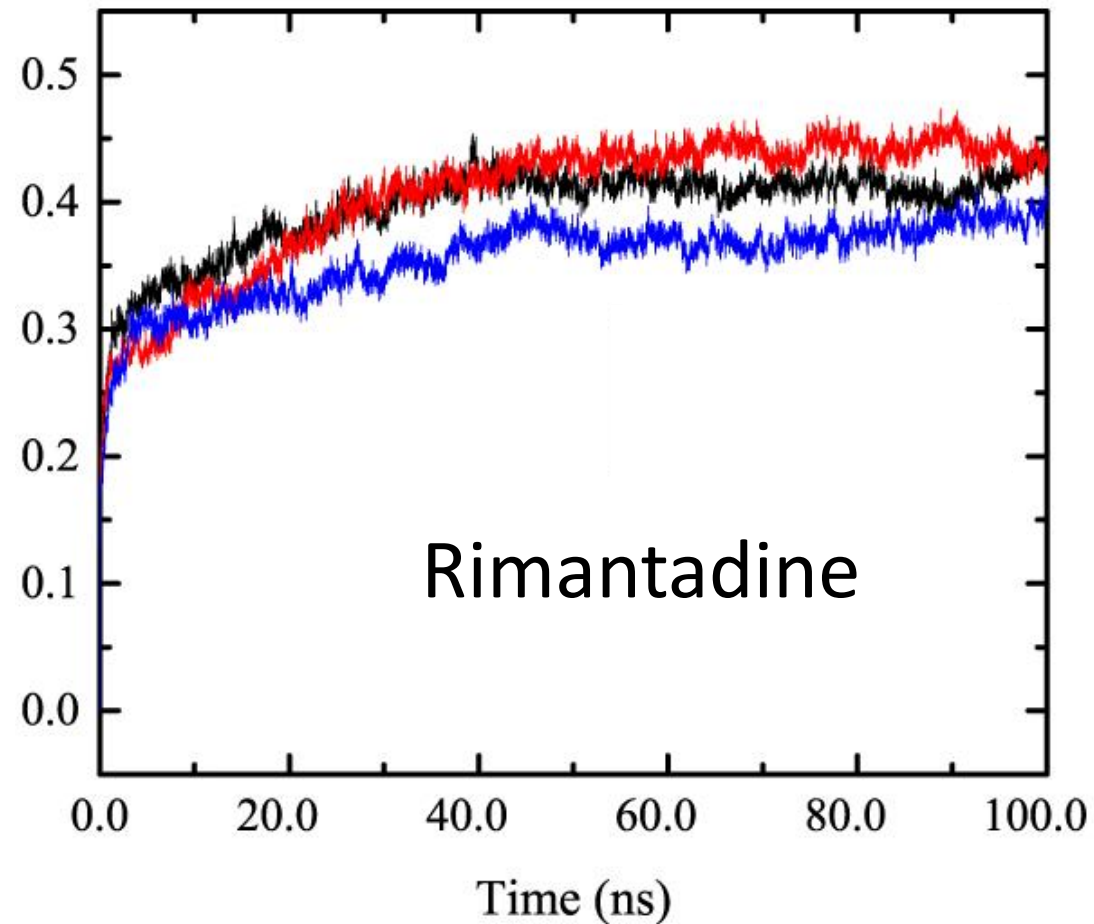

Plot of RMSD values over time for protein without any ligand (**black line**) and with ligand (wild-type: **red line**, L20F mutant: **blue line**)

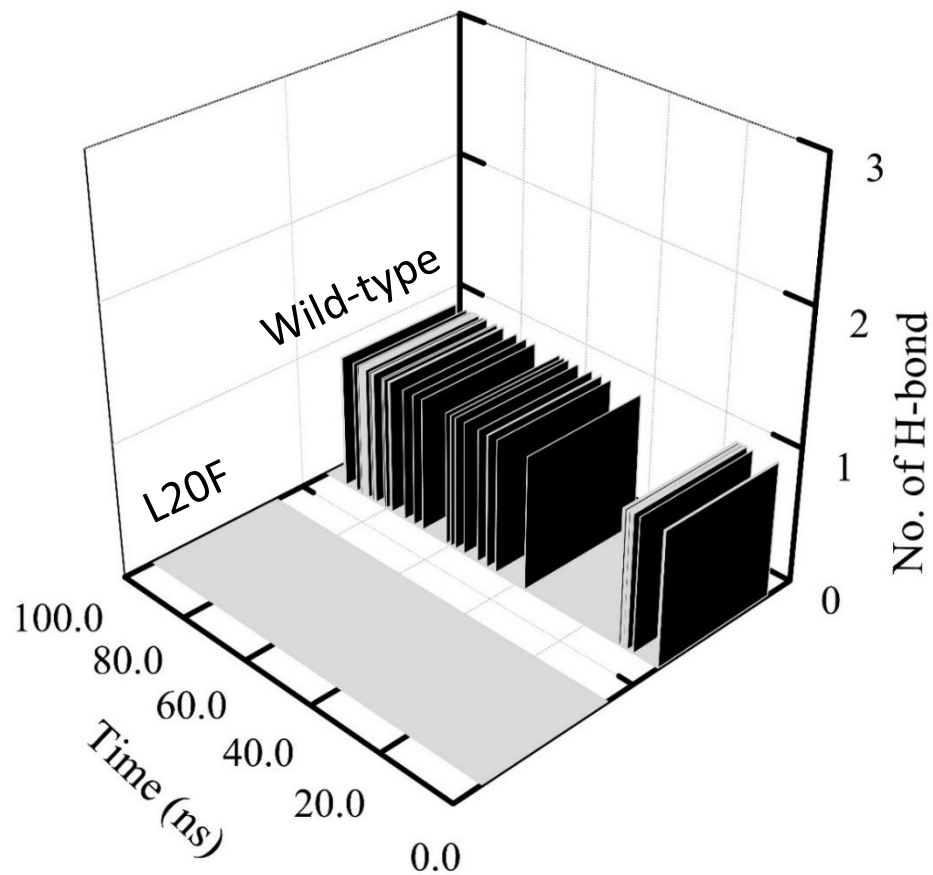

This figure describes the number of H-bonds between the ligand and the side-chains of the protein over the course of simulation

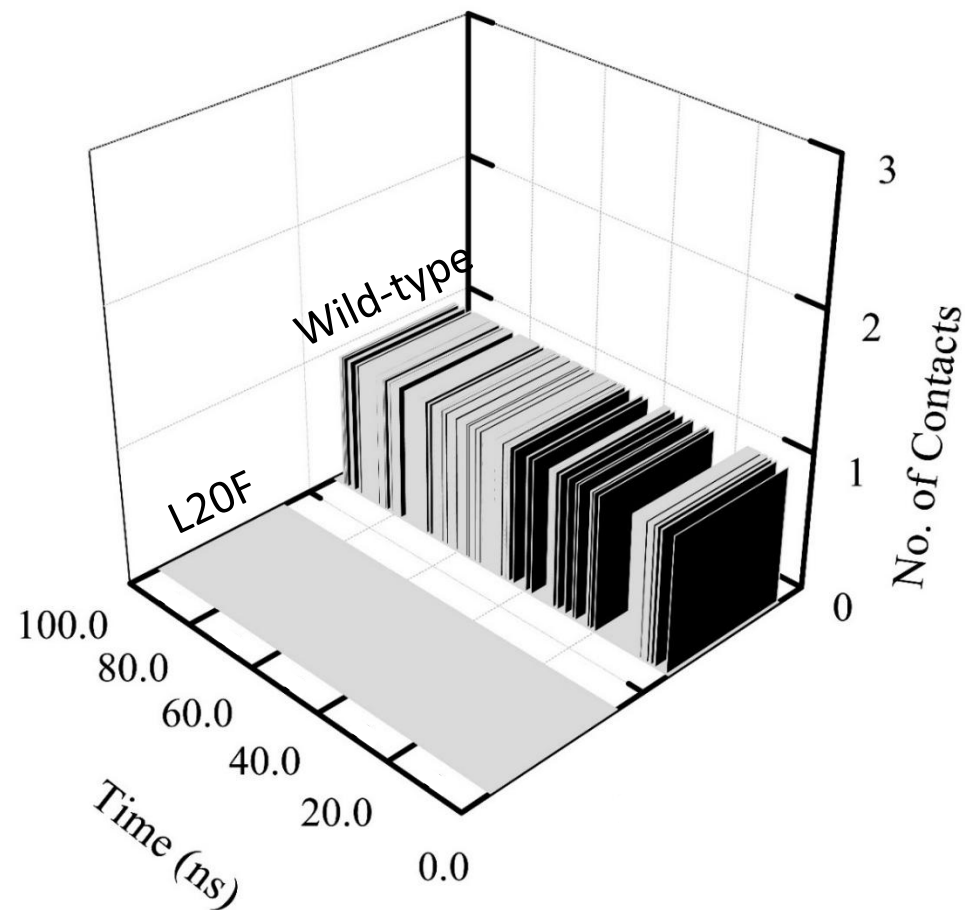

This figure describes the number of contacts (but not bonding) made within a range of 3.5 Å between the ligand and the side-chains of the protein over the course of simulation

From the simulation over 100ns it is evident that only in the **wild type** of the protein, the ligand makes H-bondings and contacts whilst it doesn't in **L20F mutant**. Moreover, in the **wild type**, JK3/32 is in partially continuous H-bonding with the side chains.
