# Supplementary material for: Rationally derived inhibitors of hepatitis C virus (HCV) p7 channel activity reveal prospect for bimodal antiviral therapy
Source: eLife journal article supplement (doi:10.7554/elife.52555), 2020-11-10
Supplement: fig4-data1 [file GT1and3JKentry.xlsx]

## Sheet: Sheet1
								red					error
						0	2	4	8			0	2	4	8
				J4-JFH1	JK3-32	2579.75	1252	740.25	760.75			199.432	309.696	168.031	139.596
				J4-JFH1	RS-21	1504.75	1538.75	1863.25	2248.75			251.269	287.886	134.613	381.672
						0	2	4	8
			%			100	48.5318	28.6946	29.4893			7.73067	12.0049	6.51348	5.41123
						100	102.26	123.825	149.443			16.6984	19.1318	8.94584	25.3645
				S52-JFH1	JK3-32	3921	4037.25	2668.5	2115.5			270.203	434.719	478.262	369.716
				S52-JFH1	RS-21	3777.75	3842.75	3866.5	3081.5			191.093	194.213	305.898	239.125
			%			100	102.965	68.0566	53.9531			6.89117	11.0869	12.1974	9.42912
						100	101.721	102.349	81.5697			5.05838	5.14096	8.09736	6.32983
				JFH1	JK3-32	330.5	105.25	95	88			94.3084	48.6353	51.3436	37.6453
				JFH1	R21	279.25	194	231.5	108.75			96.65	63.7142	58.6664	27.9654
			%			100	31.8457	28.7443	26.6263			28.5351	14.7157	15.5351	11.3904
						100	69.4718	82.9006	38.9436			34.6106	22.8162	21.0086	10.0145
										0	2	4	8			S52-JFH1	JK3-32	3921	4037.25	2668.5	2115.5
																S52-JFH1	RS-21	3777.75	3842.75	3866.5	3081.5
								J4-JFH1	JK3-32	2579.75	1252	740.25	760.75
								J4-JFH1	RS-21	1504.75	1538.75	1863.25	2248.75
																		100	102.965	68.0566	53.9531
																		100	101.721	102.349	81.5697
										0	2	4	8
										100	48.5318	28.6946	29.4893
										100	102.26	123.825	149.443
										3044	1215	723	1051					3931	4614	3849	2334
										2744	2006	791	409					4027	4450	2976	2907
										2402	491	314	682					4518	2744	1651	2088
										2129	1296	1133	901					3208	4341	2198	1133
									avg	2579.75	1252	740.25	760.75					3921	4037.25	2668.5	2115.5
										1692	2320	1570	2566					4027	3658	3617	2539
										942	1078	1993	2948					3208	3413	3167	2866
										1283	1624	2170	1174					3931	4300	4587	3290
										2102	1133	1720	2307					3945	4000	4095	3631
									avg	1504.75	1538.75	1863.25	2248.75					3777.75	3842.75	3866.5	3081.5
								individual % values		117.996	47.0976	28.026	40.7404					100.255	117.674	98.1637	59.5256
										106.367	77.7595	30.6619	15.8542					102.703	113.491	75.899	74.1393
								J4, JK332		93.1098	19.0329	12.1717	26.4367				S52, JK	115.226	69.9821	42.1066	53.2517
										82.5274	50.2374	43.919	34.9259					81.8159	110.712	56.0571	28.8957
								Ttest vs S52		0.5	0.00789345	0.0146556	0.0327086
										112.444	154.178	104.336	170.527					106.598	96.8301	95.7448	67.2093
								J4, R21		62.6018	71.6398	132.447	195.913				S52, R21	84.9183	90.3448	83.833	75.8653
										85.2633	107.925	144.21	78.0196					104.057	113.824	121.421	87.0889
										139.691	75.2949	114.305	153.315					104.427	105.883	108.398	96.1154
								ttest vs S52		0.5	0.48959	0.0627079	0.020432

## Sheet: Sheet2
					Phase					error									Phase						Error
																			0	2	4	8			0	2	4	8
			0	2	4	8			0	2	4	8					J4-JFH1	JK3-32	85.2238	82.2965	72.8905	90.9217			4.28017	10.7915	8.94338	2.99689
																	J4-JFH1	RS-21	84.1061	94.7533	88.6025	75.811			9.98049	0.908744	4.91464	12.0581
	J4-JFH1	JK3-32	85.2238	82.2965	72.8905	90.9217			4.28017	10.7915	8.94338	2.99689					S52-JFH1	JK3-32	87.818	89.5656	88.5222	81.4216			7.0397	5.2643	5.70404	7.3978
	J4-JFH1	RS-21	84.1061	94.7533	88.6025	75.811			9.98049	0.908744	4.91464	12.0581					S52-JFH1	RS-21	90.0128	93.2899	92.9414	84.1305			4.56804	2.12502	3.1305	6.20495
																	JFH1	JK3-32	95.1564	92.6238	79.0217	74.2955			1.94207	2.46635	10.9614	8.73606
			0	2	4	8											JFH1	RS-21	94.1174	95.737	87.7655	79.5464			2.51003	1.74988	7.30094	4.58395
%			100	96.5652	85.5284	106.686			5.02228	12.6625	10.494	3.51649
			100	112.659	105.346	90.1372			11.8665	1.08047	5.84338	14.3368
	S52-JFH1	JK3-32	87.818	89.5656	88.5222	81.4216			7.0397	5.2643	5.70404	7.3978
	S52-JFH1	RS-21	90.0128	93.2899	92.9414	84.1305			4.56804	2.12502	3.1305	6.20495
%			100	101.99	100.802	92.7163			8.01624	5.99455	6.4953	8.42401
			100	103.641	103.254	93.4651			5.07488	2.3608	3.47784	6.89341
	JFH1	JK3-32	95.1564	92.6238	79.0217	74.2955			1.94207	2.46635	10.9614	8.73606
	JFH1	RS-21	94.1174	95.737	87.7655	79.5464			2.51003	1.74988	7.30094	4.58395
%			100	97.3384	83.0441	78.0772			2.04092	2.59189	11.5193	9.18074
			100	101.721	93.2511	84.5182			2.66692	1.85925	7.75726	4.87046
