# Supplementary material for: Rationally derived inhibitors of hepatitis C virus (HCV) p7 channel activity reveal prospect for bimodal antiviral therapy
Source: eLife journal article supplement (doi:10.7554/elife.52555), 2020-11-10
Supplement: fig4-data1 [file J4-JK332-R21summary.xlsx]

## Sheet: Sheet1
	Exp#020, 18/05/15
									J4-JFH1 @ MOI 0.6
	JK3-32	JK3-32	21.RS-21	21.RS-21					18 h infection onto 8 x 10^3 cells
	4 µM	0 µM	4 µM	0 µM					Compounds/ DMSO added to virus-containing supernatant immediately before addition to cells and maintained for duration of 18 h infection
									Following 18h infection, cells washed 3x PBS and incubated in media 48h
	692.5	1709.5	1515	1596.75		Red
	60.7144	54.9161	65.5957	57.559		Phase (% Confluency)
	41.8539	449.401	264.918	279.864		Red Error
	4.66615	12.1697	8.42428	10.5736		Phase Error
