# Supplementary material for: Rationally derived inhibitors of hepatitis C virus (HCV) p7 channel activity reveal prospect for bimodal antiviral therapy
Source: eLife journal article supplement (doi:10.7554/elife.52555), 2020-11-10
Supplement: fig4-data1 [file J4-JKvsR21.xlsx]

## Sheet: 18h plate
	Barcode: 2015y5m18d10h25								Barcode: 2015y5m18d10h25
	Time Stamp:	2015-05-18 10:29:00	Elapsed:	0	hours				Time Stamp:	2015-05-18 10:29:00	Elapsed:	0	hours
	Red Object Count (1/Well)								Phase Object Confluence (Percent)
		1	2	3	4	5				1	2	3	4	5
	A								A
	B								B
	C				692.5	1709.5			C				60.7144	54.9161
	D								D
	E				1515	1596.75			E				65.5957	57.559
																	JK3-32
	Std Error								Std Error											4h	8h	18h
		1	2	3	4	5				1	2	3	4	5			21.RS21
	A								A											768.5	603.75	1653.12
	B								B			6.02333								185.24	74.96	79.7263
	C				41.8539	449.401			C			6.06711	4.66615	12.1697
	D								D
	E				264.918	279.864			E			14.5097	8.42428	10.5736
	% Error
					0.0604389	0.262884							0.0768541	0.221605
					0.174863	0.175271							0.128427	0.1837
	Normalised data
			692.5	1709.5			C				60.7144	54.9161
			1549	1767.5			D				77.3024	70.5438				JK3-32		21.RS-21
			1515	1596.75			E				65.5957	57.559
																4		4
			1709.5	1709.5							54.9161	54.9161				0		0
			1767.5	1767.5							70.5438	70.5438
			1596.75	1596.75							57.559	57.559
			40.5089	100							110.559	100
			87.6379	100							109.581	100
			94.8802	100							113.962	100
															4 µM
															0 µM
															4 µM
															0 µM
				692.5	1709.5	1515	1596.75
				60.7144	54.9161	65.5957	57.559
				41.8539	449.401	264.918	279.864
				4.66615	12.1697	8.42428	10.5736
