# Supplementary material for: Rationally derived inhibitors of hepatitis C virus (HCV) p7 channel activity reveal prospect for bimodal antiviral therapy
Source: eLife journal article supplement (doi:10.7554/elife.52555), 2020-11-10
Supplement: fig4-data1 [file pH1N1031115_JK332.xlsx]

## Sheet: Sheet1
		DMSO	3	79	64	60	67.6667	DMSO	67666.7	10016.7
		80 pM	3	70	78	58	68.6667	80 pM	68666.7	10066.4
		800 pM	3	55	62	71	62.6667	800 pM	62666.7	8020.81
		8 nM	3	50	61	52	54.3333	8 nM	54333.3	5859.47
		80 nM	3	36	32	29	32.3333	80 nM	32333.3	3511.88
		800 nM	3	25	26	18	23	800 nM	23000	4358.9
		8 uM	2	40	36	30	35.3333	8 uM	3533.33	503.322
		80 uM	1	59	48	53	53.3333	80 uM	533.333	55.0757

## Sheet: Sheet2
	JK332						JK332
	DMSO	72	62	57	63.6667	DMSO	100	7.63763	11.9963
	0.4	63	68	67	66	0.4	103.665	2.64575	4.15563
	4	61	58		59.5	4	93.4555	2.12132	3.33192
