# Supplementary material for: Rationally derived inhibitors of hepatitis C virus (HCV) p7 channel activity reveal prospect for bimodal antiviral therapy
Source: eLife journal article supplement (doi:10.7554/elife.52555), 2020-11-10
Supplement: fig4-data1 [file prototypep7i.xls]

## Sheet: Sheet1
	Entry experiment 11-8-09. JFH-1 and JFH-1 L20F diluted to 1x10^4 FFU/ml and 100 ul used to infect 10^4 Huh7 cells in a 96 well plate. Both cells and virus pre-incubated with drugs for 15 min, 37 oC prior to infection. Virus then serially diluted across 3 wells and counted 48 hr post-infection.
																		t test
	JFH-1						L20F										JFH-1		L20F
		1	2	average	Stdev		1	2	average	stdev
	DMSO	4000	3100	3550	636.396		3900	3500	3700	282.843					Ama 40 vs rim 40		0.0275827		0.341886
	DNJ 40	1800	1500	1650	212.132		2100	1800	1950	212.132					Ama 40 vs DNJ 40		0.00855624		0.0199993
	DNJ 80	600	900	750	212.132		1600	1300	1450	212.132
	Ama 40	3600	4100	3850	353.553		3800	4700	4250	636.396					Ama 80 vs rim 80		0.0220763		0.229869
	Ama 80	2900	2500	2700	282.843		2500	3900	3200	989.949					Ama 80 vs DNJ 80		0.00802105		0.0672081
	Rim 40	2200	1300	1750	636.396		3500	4400	3950	636.396
	Rim 80	1700	1400	1550	212.132		4000	3700	3850	212.132
			drug conc
		0	40	80			0	40	80
	NNDNJ	3550	1650	750		NNDNJ	3700	1950	1450
	Ama	3550	3850	2700		Ama	3700	4250	3200
	Rim	3550	1750	1550		Rim	3700	3950	3850
		636.396	212.132	212.132			282.843	212.132	212.132
		636.396	353.553	282.843			282.843	636.396	989.949
		636.396	636.396	212.132			282.843	636.396	212.132
