# Supplementary material for: Rationally derived inhibitors of hepatitis C virus (HCV) p7 channel activity reveal prospect for bimodal antiviral therapy
Source: eLife journal article supplement (doi:10.7554/elife.52555), 2020-11-10
Supplement: fig4-data1 [file TOAsummary.xlsx]

## Sheet: Sheet1
	n=3 (duplicates)
	Average
		Before	During	After
		375	368	504.5		DMSO
		289.75	368.25	344		JK332-400 nM		Not high enough
		320.25	180.25	374.75		JK332-4uM
		494.5	375	467		Rim-20uM		Not high enough
		337.5	344.25	143		DCV-50pM
	Std error
		55.2645	76.5408	28.5029
		57.6243	70.1432	55.7644
		62.337	42.1137	40.7029
		100.705	61.3705	128.278
		37.0011	115.841	40.5113
				Before	During	After
		DMSO		375	368	504.5		55.2645	76.5408	28.5029
		JK3/32 4uM		320.25	180.25	374.75		62.337	42.1137	40.7029
		DCV 50pM		337.5	344.25	143		37.0011	115.841	40.5113
