# Supplementary material for: Rationally derived inhibitors of hepatitis C virus (HCV) p7 channel activity reveal prospect for bimodal antiviral therapy
Source: eLife journal article supplement (doi:10.7554/elife.52555), 2020-11-10
Supplement: fig5-data1 [file AlexaGrad061015.xlsx]

## Sheet: Sheet1
	Barcode: 2015y9m27d15h41
	Metric: 27.08.15 Red Count (1/Well)
	Cell Type:
	Passage: 1
	Notes:
	Analysis Job: Steve's test 270815 Hazel
	Date Time	Elapsed	A1	A2	A3	A4	A5	A6	A7	A8	A9	A10	A11	A12	B1	B2	B3	B4	B5	B6	B7	B8	B9	B10	B11	B12	C1	C2	C3	C4	C5	C6	C7	C8	C9	C10	C11	C12	D1	D2	D3	D4	D5	D6	D7	D8	D9	D10	D11
	2015-10-06 10:30:00	0	98.5	842.25	4150	6136.25	7839.25	8539	7825.75	6173.5	1682.25	590	143	658	33.5	43.75	47	64.25	50.5	33.5	47.25	40.25	23.25	40.25	26.75	33.75	218	771	4740	6600.5	8921.5	9576.5	10579.8	16310.5	5368.5	11225	4525	10962.2	641.25	788	296.25	395.5	764	2357.75	7829	7743.75	3576.5	11092	6668.75
[truncated: 49 more columns]

## Sheet: Sheet2
																																																	fraction
																			IU/mL (x40)															Drugs															1
																																																	2
																																total infectivity	per ml		1.043	1.076	1.109	1.112	1.125	1.144	1.157	1.179	1.186	1.189	1.23	1.286			3
			J4	98.5	842.25	4150	6136.25	7839.25	8539	7825.75	6173.5	1682.25	590	143	658				3940	33690	166000	245450	313570	341560	313030	246940	67290	23600	5720	26320		1787110	8935550	J4	3940	33690	166000	245450	313570	341560	313030	246940	67290	23600	5720	26320			4
			J4 + syto 82	33.5	43.75	47	64.25	50.5	33.5	47.25	40.25	23.25	40.25	26.75	33.75				1340	1750	1880	2570	2020	1340	1890	1610	930	1610	1070	1350		19360	96800	J4 + R21	3670	48170	231250	241210	317670	305790	206670	47890	11590	4610	2840	800			5
			J4 + DID	218	771	4740	6600.5	8921.5	9576.5	10579.8	16310.5	5368.5	11225	4525	10962.2				8720	30840	189600	264020	356860	383060	423190	652420	214740	449000	181000	438490		3591940	17959700	J4 + Alexa	1890	4080	12130	25930	29060	12680	7220	4890	9130	2430	2030	1340			6
			J4 + syto 82 + DID	641.25	788	296.25	395.5	764	2357.75	7829	7743.75	3576.5	11092	6668.75	10487.8				25650	31520	11850	15820	30560	94310	313160	309750	143060	443680	266750	419510		2105620	10528100	J4 + JK3/32	1890	1750	12950	25510	28650	19370	10760	8720	3800	4610	2300	1340			7
			J4 + R21	91.75	1204.25	5781.25	6030.25	7941.75	7644.75	5166.75	1197.25	289.75	115.25	71	20				3670	48170	231250	241210	317670	305790	206670	47890	11590	4610	2840	800		1422160	7110800	J4 + Alexa + R21	3120	2290	22370	47620	50770	33160	18680	12130	6530	4770	1890	2170			8
			J4 + Alexa	47.25	102	303.25	648.25	726.5	317	180.5	122.25	228.25	60.75	50.75	33.5				1890	4080	12130	25930	29060	12680	7220	4890	9130	2430	2030	1340		112810	564050																9
			J4 + JK3/32	47.25	43.75	323.75	637.75	716.25	484.25	269	218	95	115.25	57.5	33.5				1890	1750	12950	25510	28650	19370	10760	8720	3800	4610	2300	1340		121650	608250																10
			J4 + Alexa + R21	78	57.25	559.25	1190.5	1269.25	829	467	303.25	163.25	119.25	47.25	54.25				3120	2290	22370	47620	50770	33160	18680	12130	6530	4770	1890	2170		205500	1027500																11
																																																	12
																																				488 nm
																																			36	59645	59310	57996		0.143832	0.140075	0.137799			total units	572	107818	110088	109427
																																			33	34543	33017	37151		0.0832994	0.0779778	0.0882713
																																			38	8203	11084	7684		0.0197813	0.0261776	0.0182573			fraction 6 as %	9.96503	0.65388	0.84387	0.60497
																																			44	1825	2919	2867		0.00440093	0.00689394	0.00681203			conc of drug in fraction from 10 uM	0.996503	0.065388	0.084387	0.060497
																																			54	1090	979	1150		0.0026285	0.00231215	0.00273242			amount transferred to cells (x0.13)	0.129545	0.00850044	0.0109703	0.0078646
																																			57	705	929	662		0.00170009	0.00219406	0.00157292
																																			61	538	562	521		0.00129737	0.0013273	0.0012379			Final conc (dil 1 in 5) (uM)	0.0259091	0.00170009	0.00219406	0.00157292
																																			54	443	447	483		0.00106828	0.0010557	0.00114761
																																			42	300	288	287		0.000723441	0.000680183	0.000681916			unbound drug conc on cells	N/A	1.7 nM	2.1 nM	1.5 nM
																																			37	173	149	222		0.000417185	0.0003519	0.000527475
																																			38	279	335	328		0.0006728	0.000791185	0.000779332
																																			78	74	69	76		0.000178449	0.000162961	0.000180577
																																								143.832	140.075	137.799
																																								83.2994	77.9778	88.2713
																																								19.7813	26.1776	18.2573
																																								4.40093	6.89394	6.81203
																																								2.6285	2.31215	2.73242
																																								1.70009	2.19406	1.57292
																																								1.29737	1.3273	1.2379
																																								1.06828	1.0557	1.14761
																																								0.723441	0.680183	0.681916
																																								0.417185	0.3519	0.527475
																																								0.6728	0.791185	0.779332
																																								0.178449	0.162961	0.180577						1.043	143.832
																																																1.076	83.2994
																																																1.109	19.7813
																																																1.112	4.40093
																																																1.125	2.6285
																																																1.144	1.70009
																																																1.157	1.29737
																																																1.179	1.06828
																																																1.186	0.723441
																																																1.189	0.417185
																																																1.23	0.6728
																																																1.286	0.178449
[truncated: 1 more columns]
